# Supplementary material for: Solution-processed spin organic light-emitting diodes based on antisolvent-treated 2D chiral perovskites with strong spin-dependent carrier transport
Source: Royal Society of Chemistry journal article supplement (doi:10.1039/d4mh01371a), 2024-12-04
Supplement: d4mh01371a1.pdf [file d4mh01371a1.pdf]

## Supporting Information

### **Solution-Processed Spin Organic Light-Emitting Diodes Based on Antisolvent-Treated 2D Chiral Perovskites with Strong Spin-Dependent Carrier Transport**

Lan-Sheng Yang\*, Chun-Yao Huang, Chin-An Hsu, Sih-Tong Lin, Yun-Shan Hsu, Chia-Hsiang Chuang, Pei-Hsuan Lo, Yu-Chiang Chao\*

Department of Physics

National Taiwan Normal University

Taipei 11677, Taiwan, R.O.C.

E-mail: [s10365love@gmail.com](mailto:s10365love@gmail.com) [ycchao@ntnu.edu.tw](mailto:ycchao@ntnu.edu.tw)

Key words: Chiral perovskites, circular dichroism, circularly polarized photoluminescence, Circularly polarized electroluminescence, Spin organic light-emitting diodes

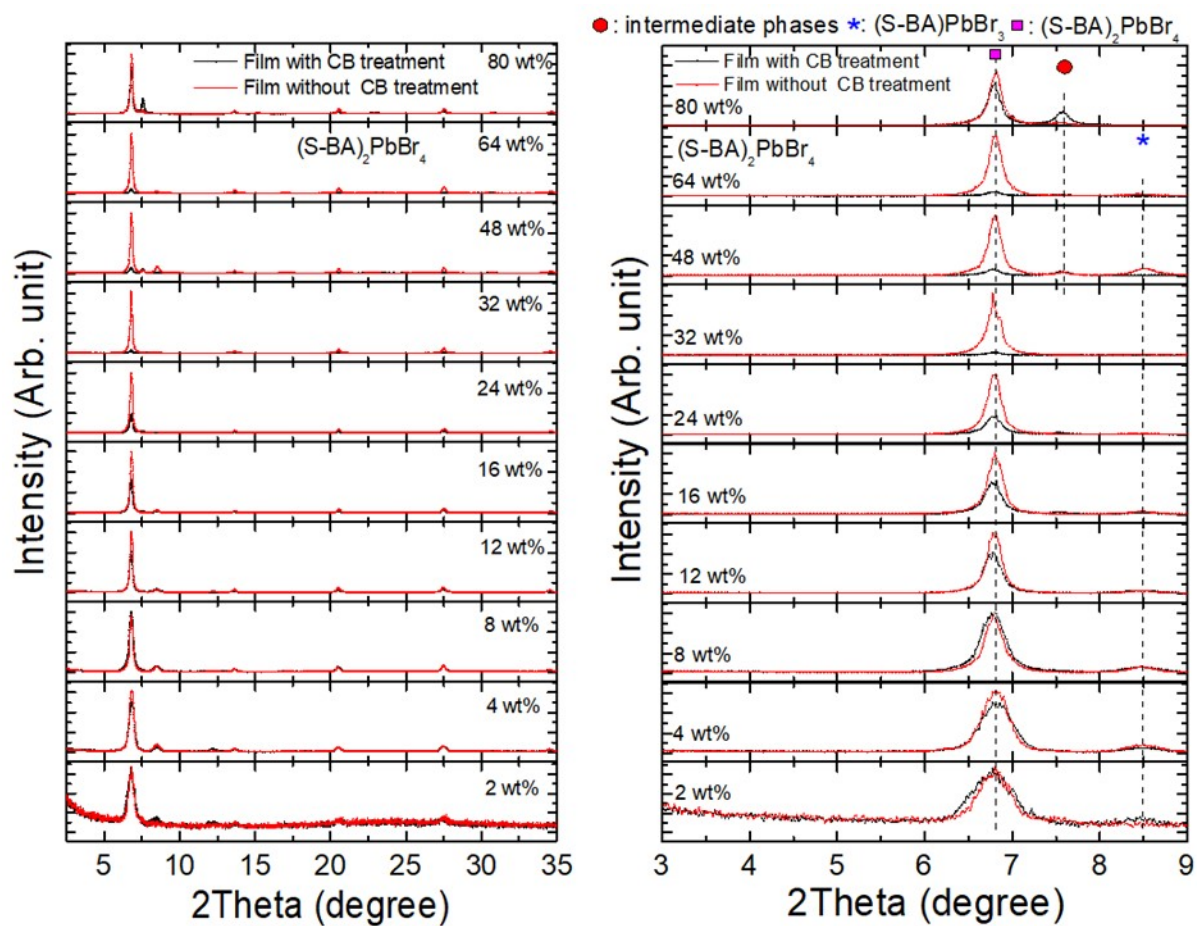

Figure S1: The XRD of the CB-treated and untreated (S-BA)<sub>2</sub>PbBr<sub>4</sub> films with different concentration chiral perovskite precursors.

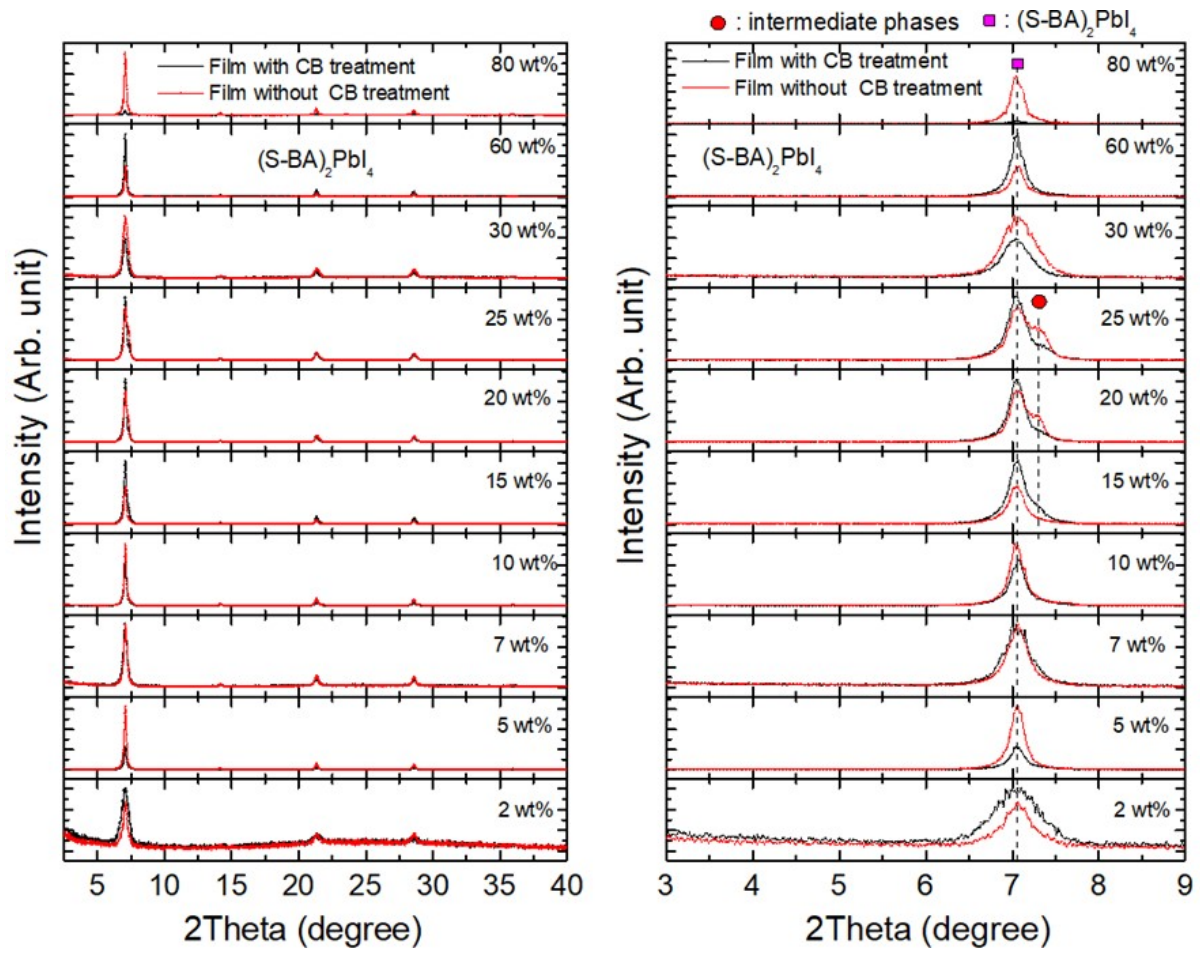

Figure S2: The XRD of the CB-treated and untreated (S-BA)<sub>2</sub>PbI<sub>4</sub> films with different concentration chiral perovskite precursors.

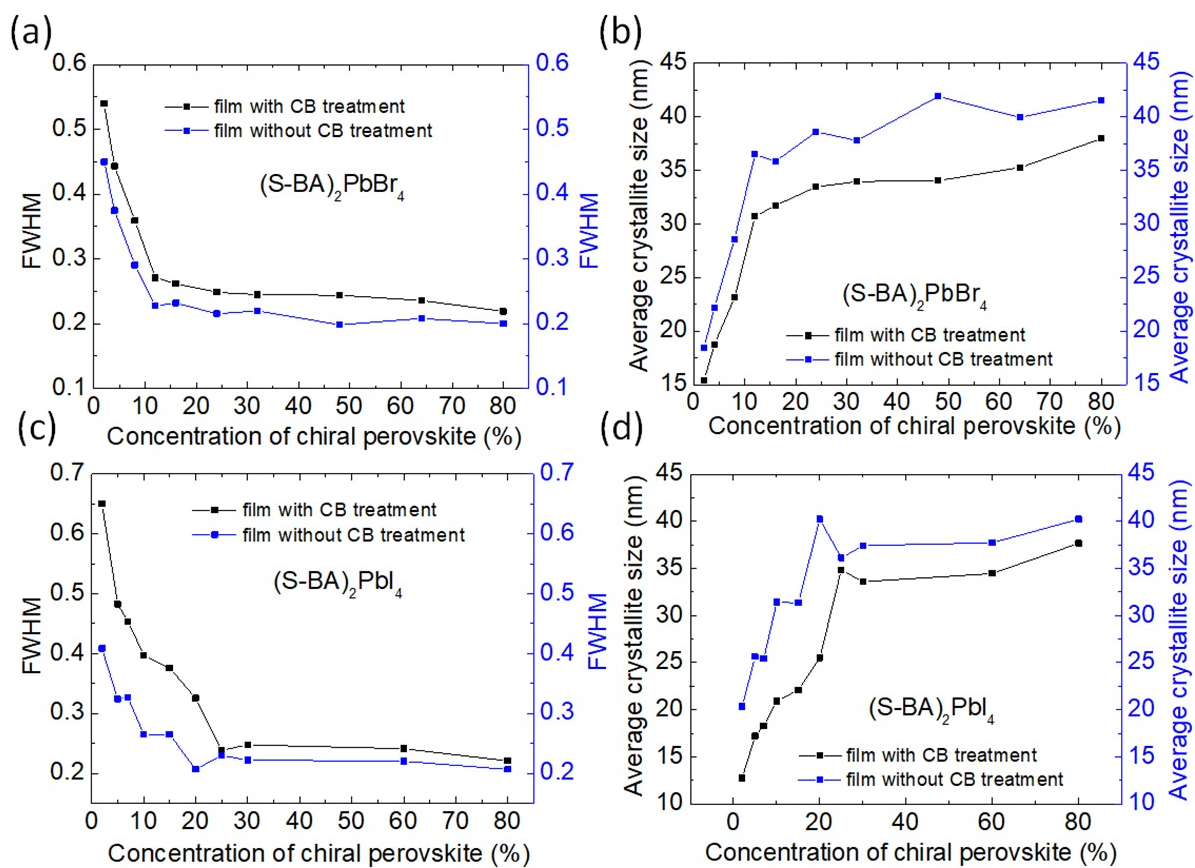

Figure S3: The (a,c) FWHM and (b,d) average crystallite size of the CB-treated and untreated  $(S-BA)_2PbBr_4$  and  $(S-BA)_2PbI_4$  films with different concentrations of chiral perovskite.

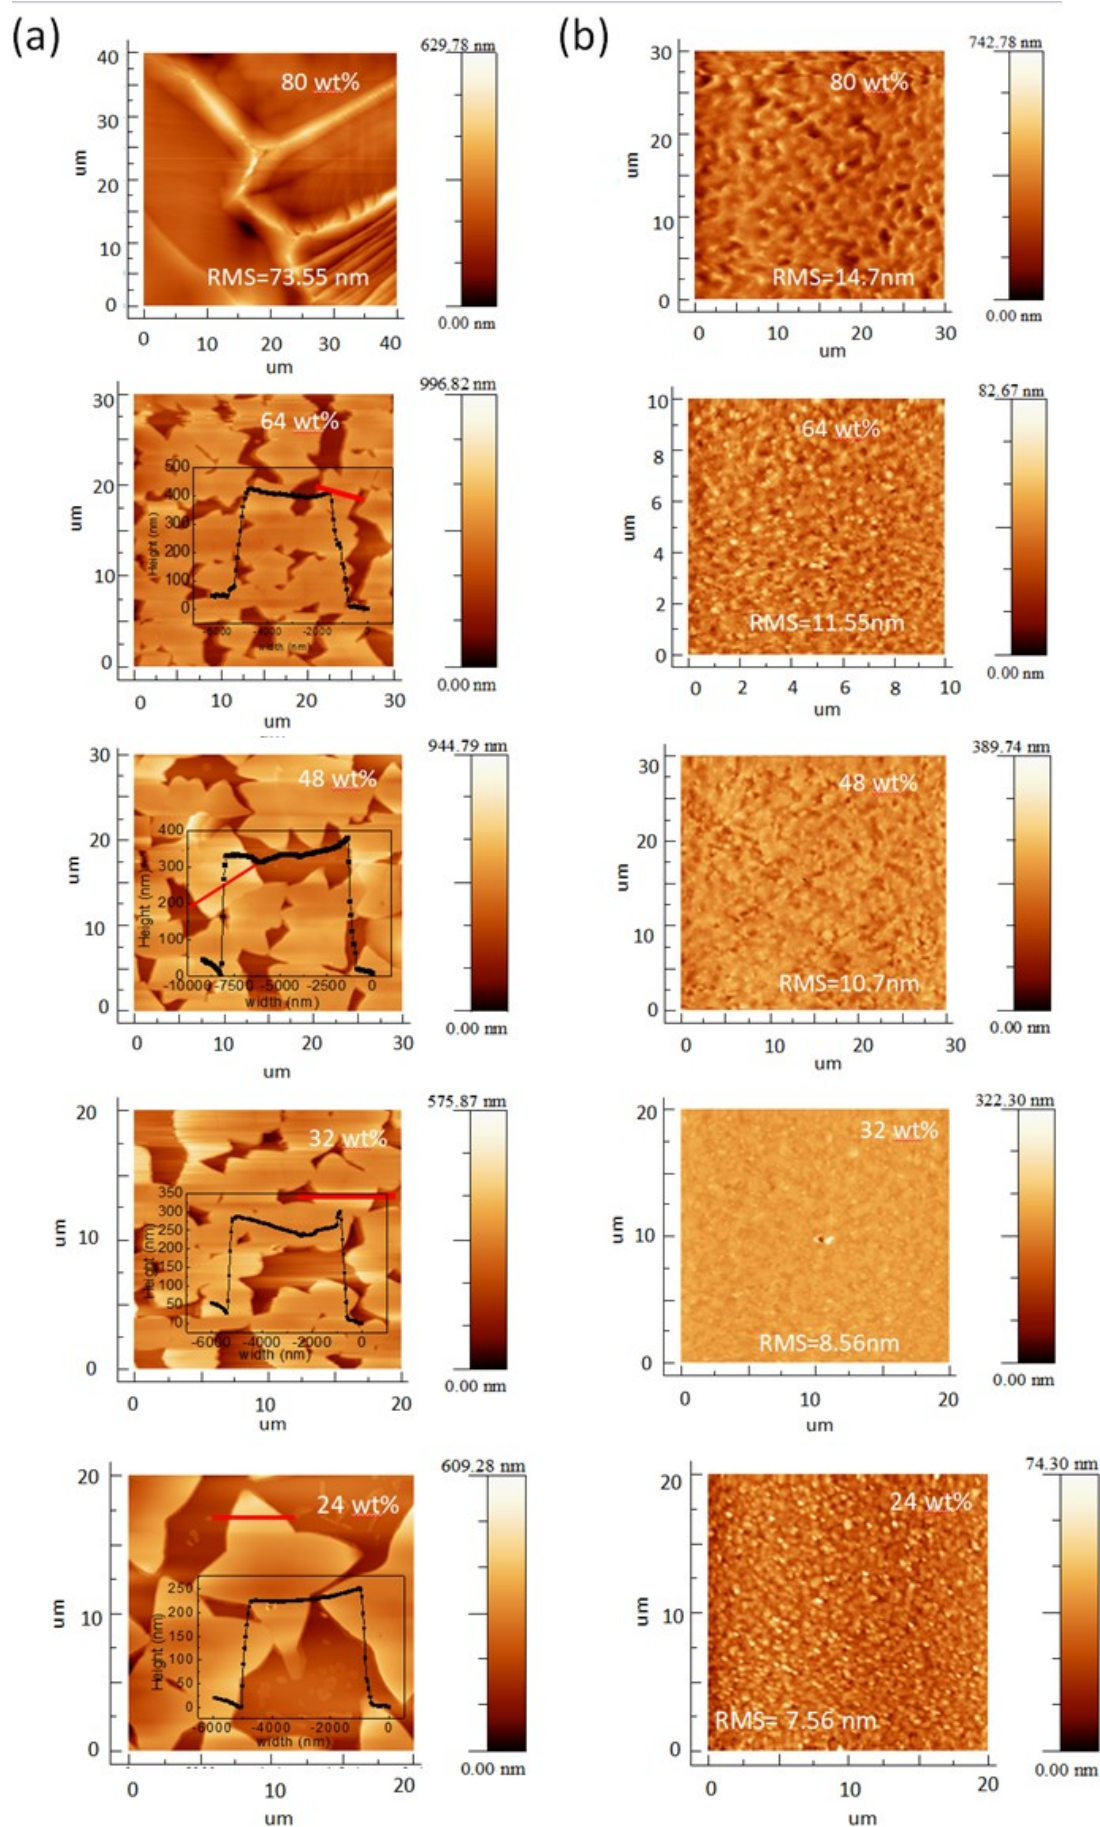

Figure S4: The AFM image of  $(S-BA)_2PbBr_4$  films(a) without and (b) with CB treatment for different concentration of chiral perovskite

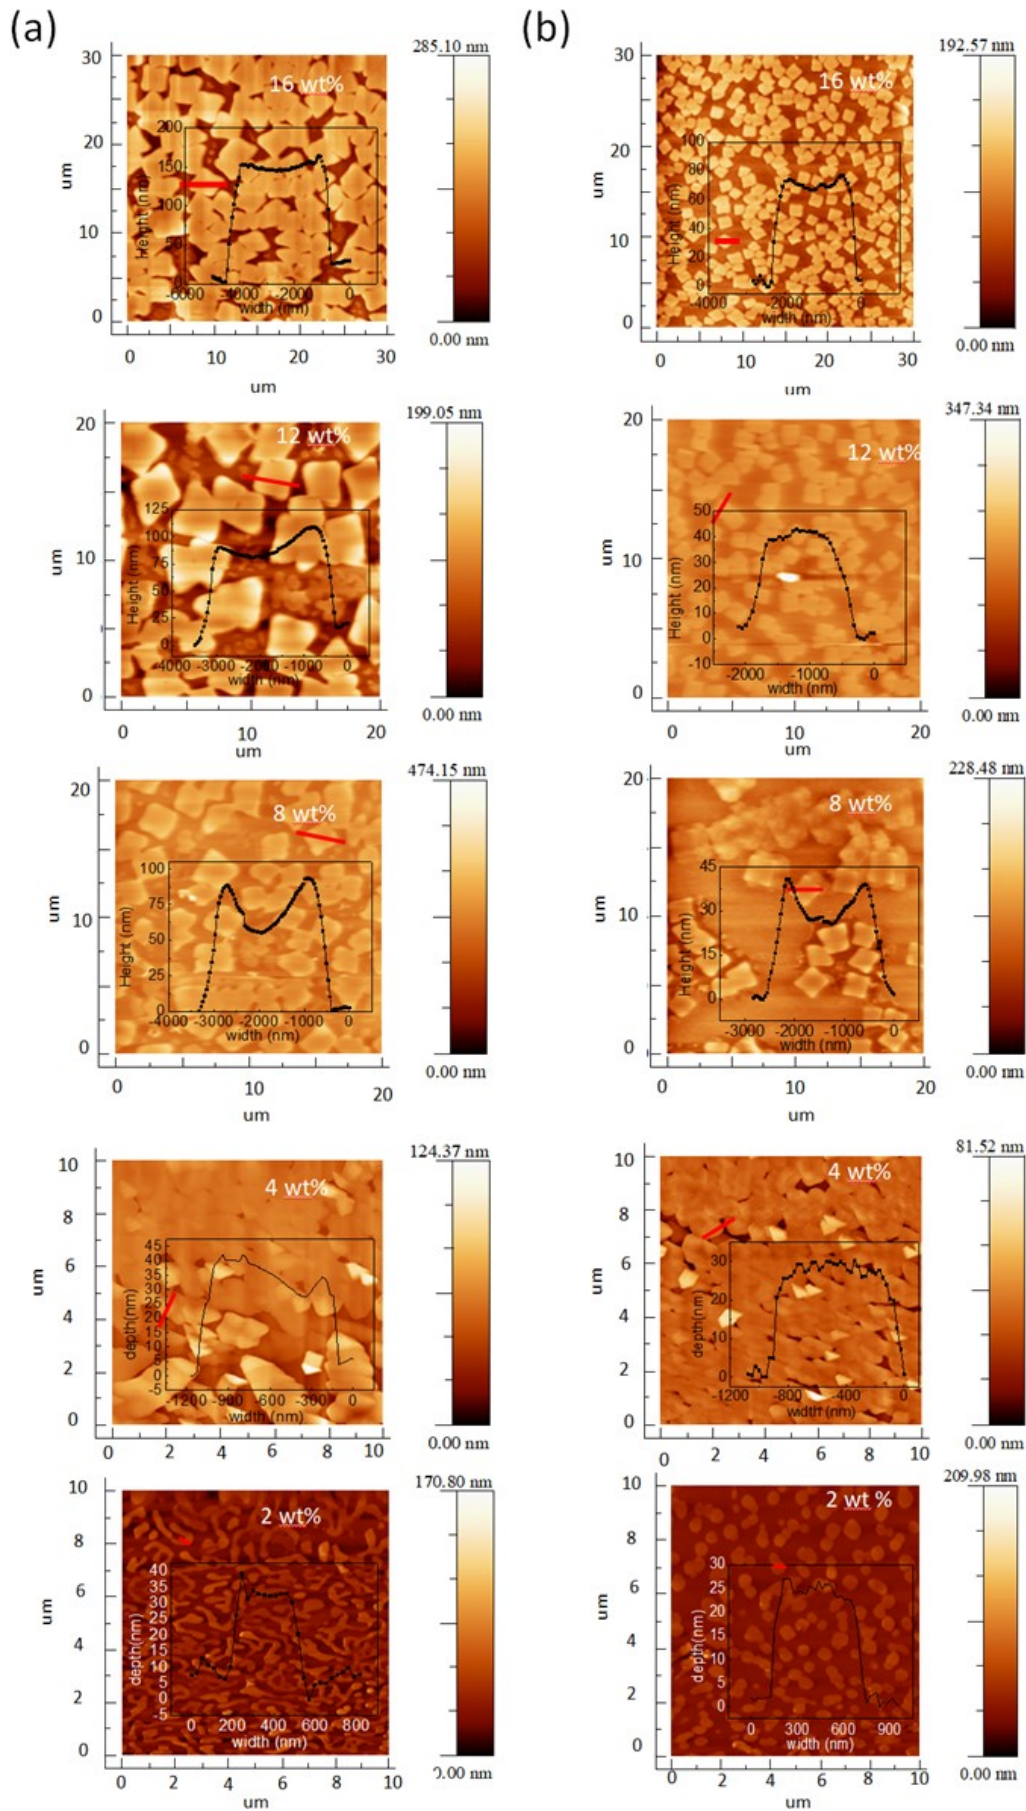

Figure S5: The AFM image of  $(S-BA)_2PbBr_4$  films (a) without and (b) with CB treatment for different concentration of chiral perovskite

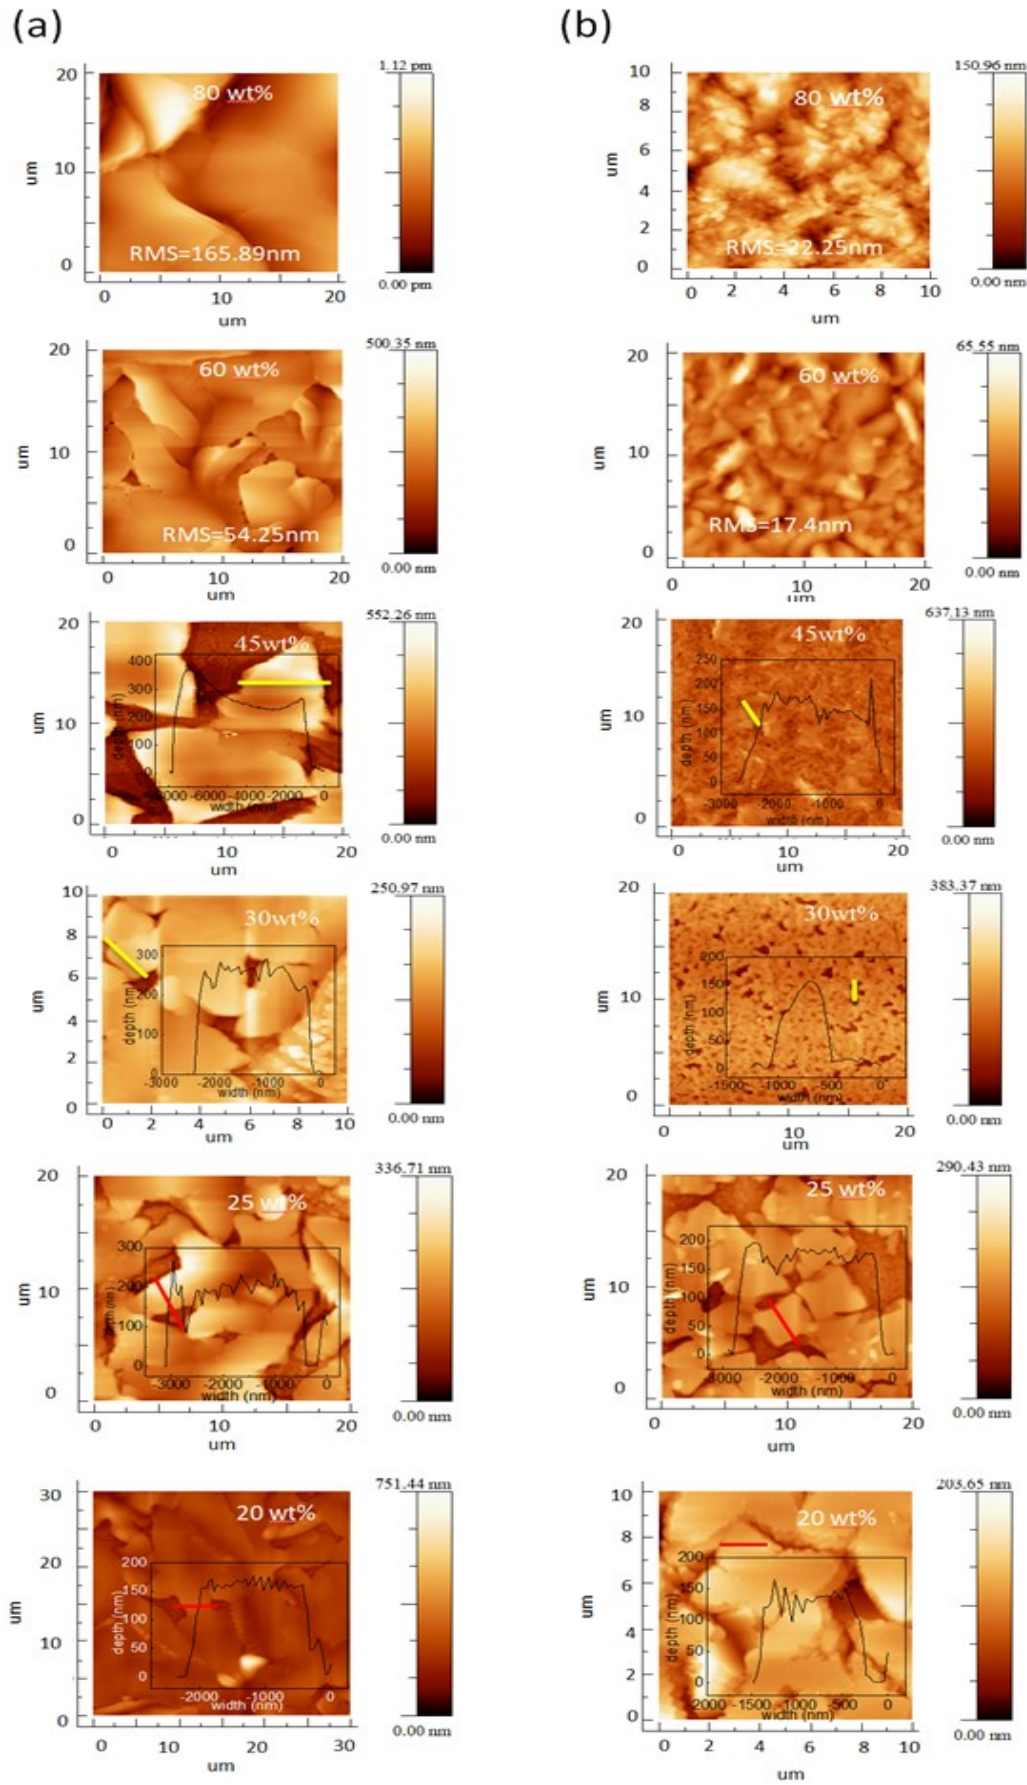

Figure S6: The AFM image of  $(S-BA)_2PbI_4$  films(a) without and (b) with CB treatment for different concentration of chiral perovskite

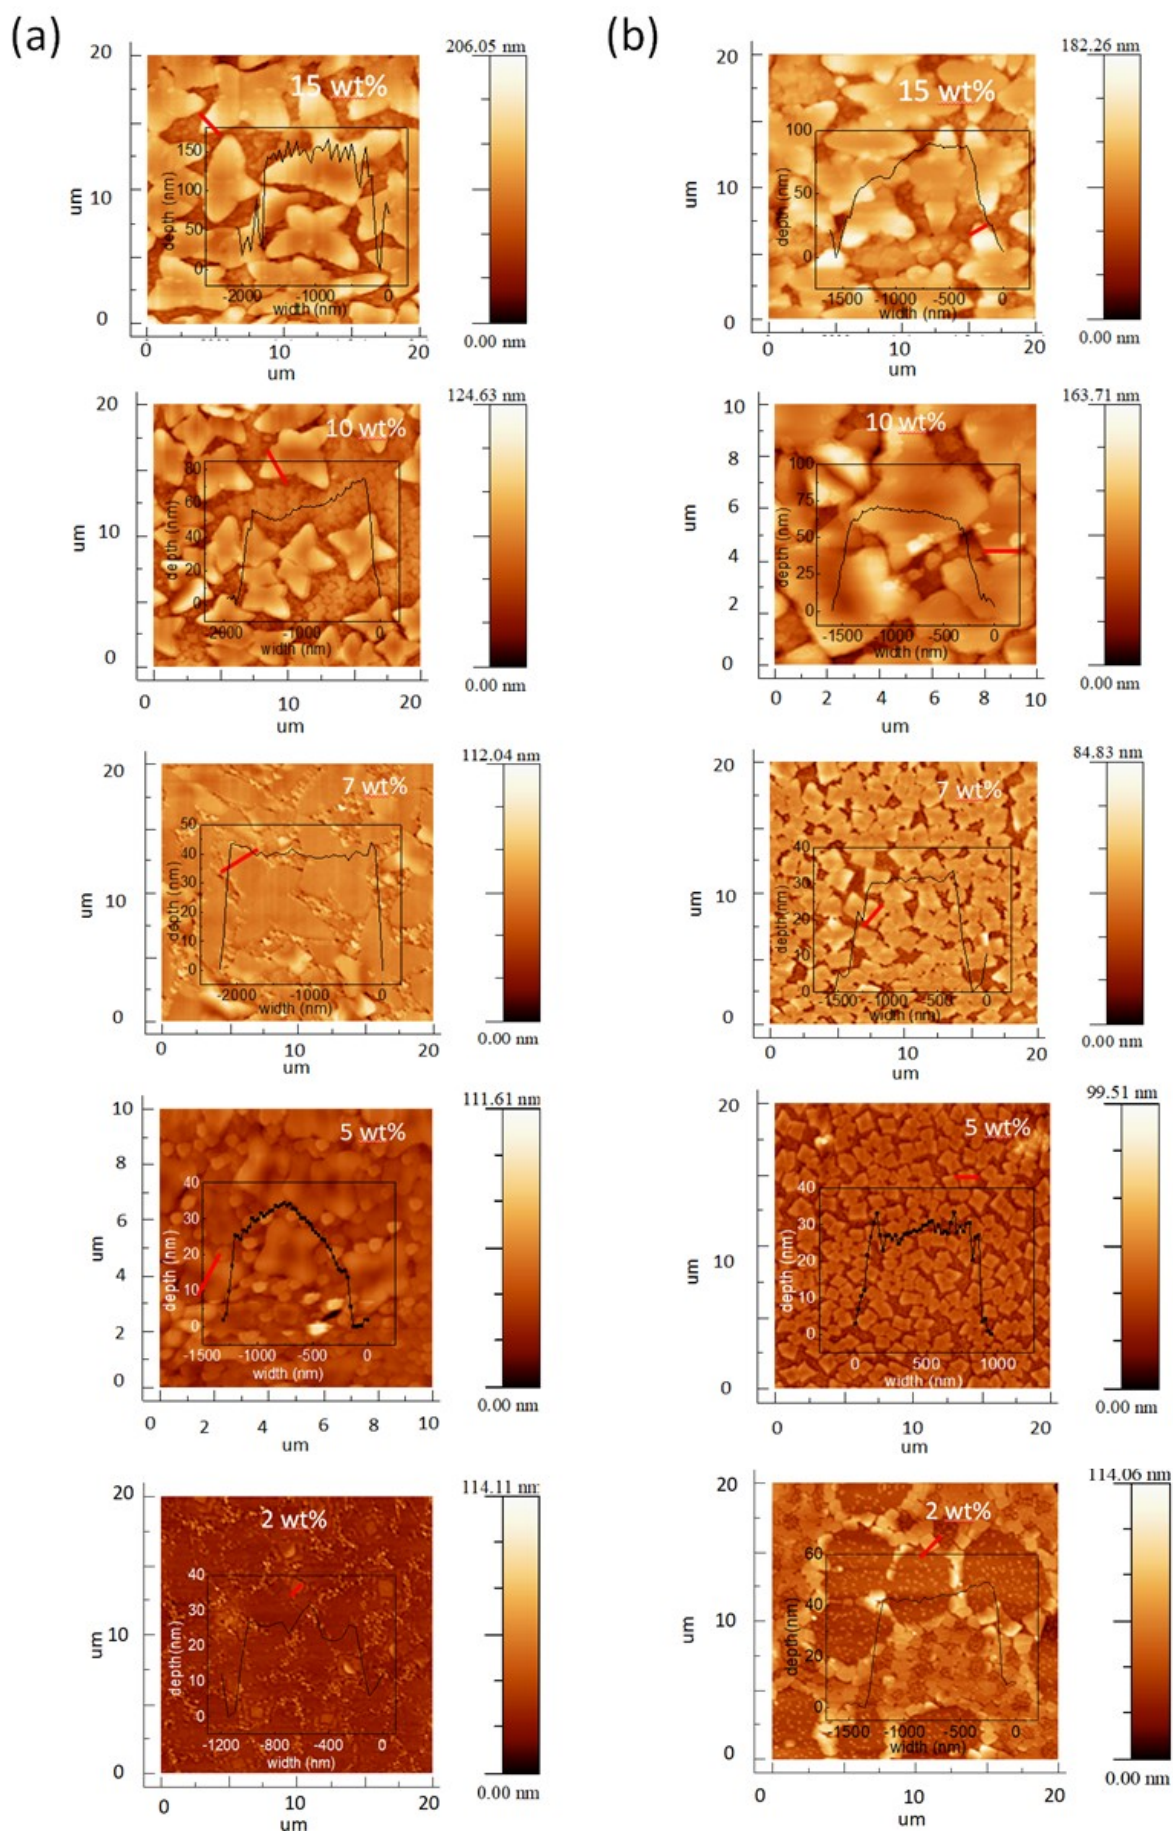

Figure S7: The AFM image of  $(S-BA)_2PbI_4$  films (a) without and (b) with CB treatment for different concentration of chiral perovskite.



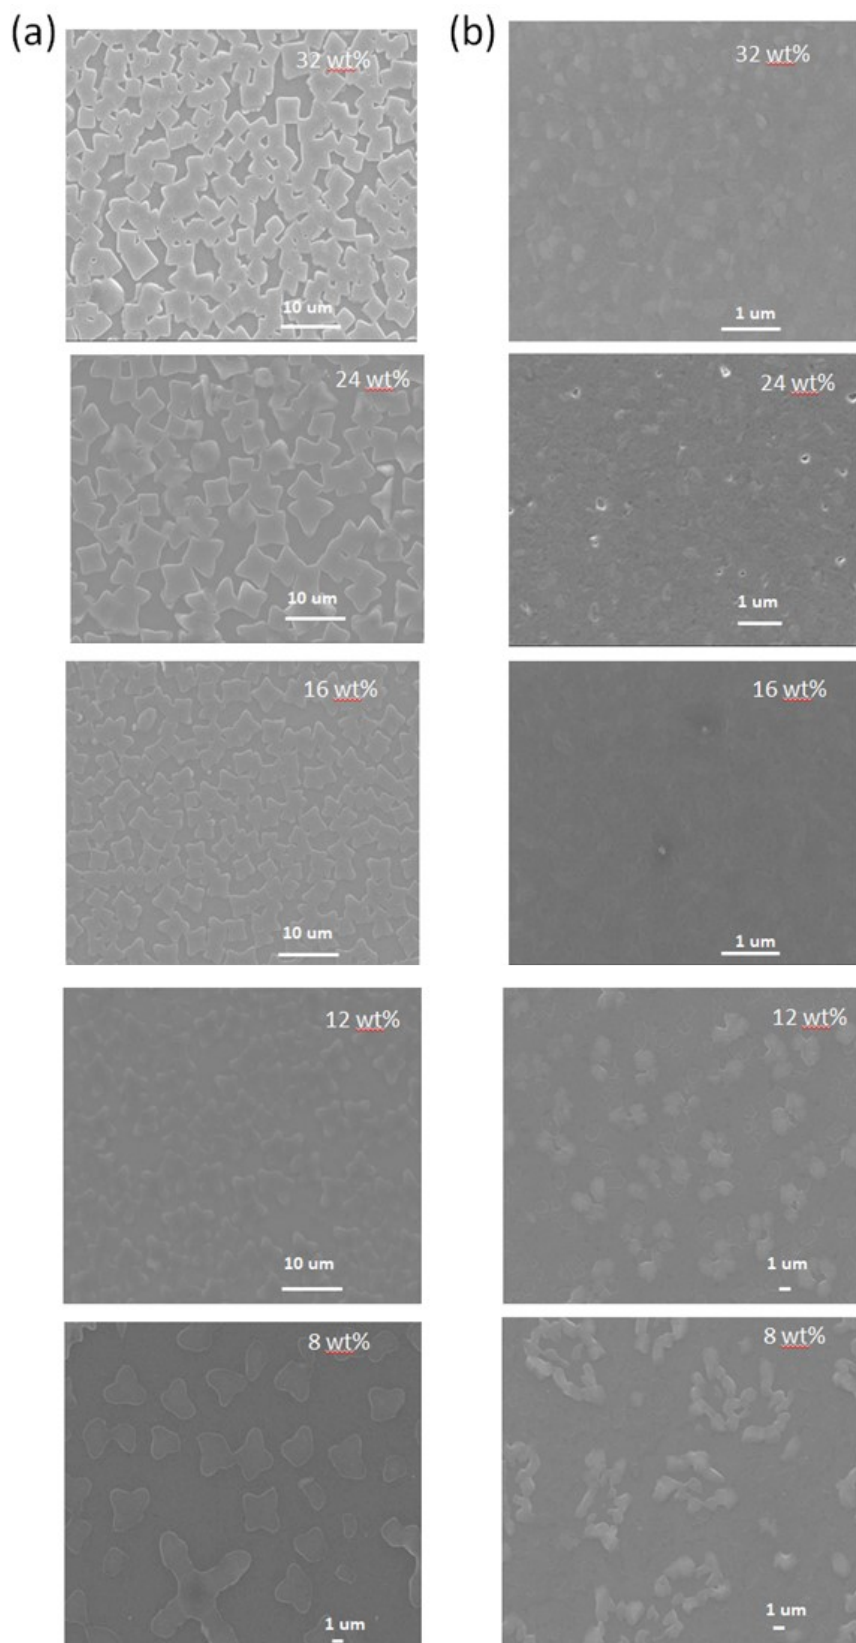

Figure S8: The top view SEM image of  $(S\text{-BA})_2\text{PbBr}_4$  films (a) without and (b) with CB treatment for different concentration of chiral perovskite.

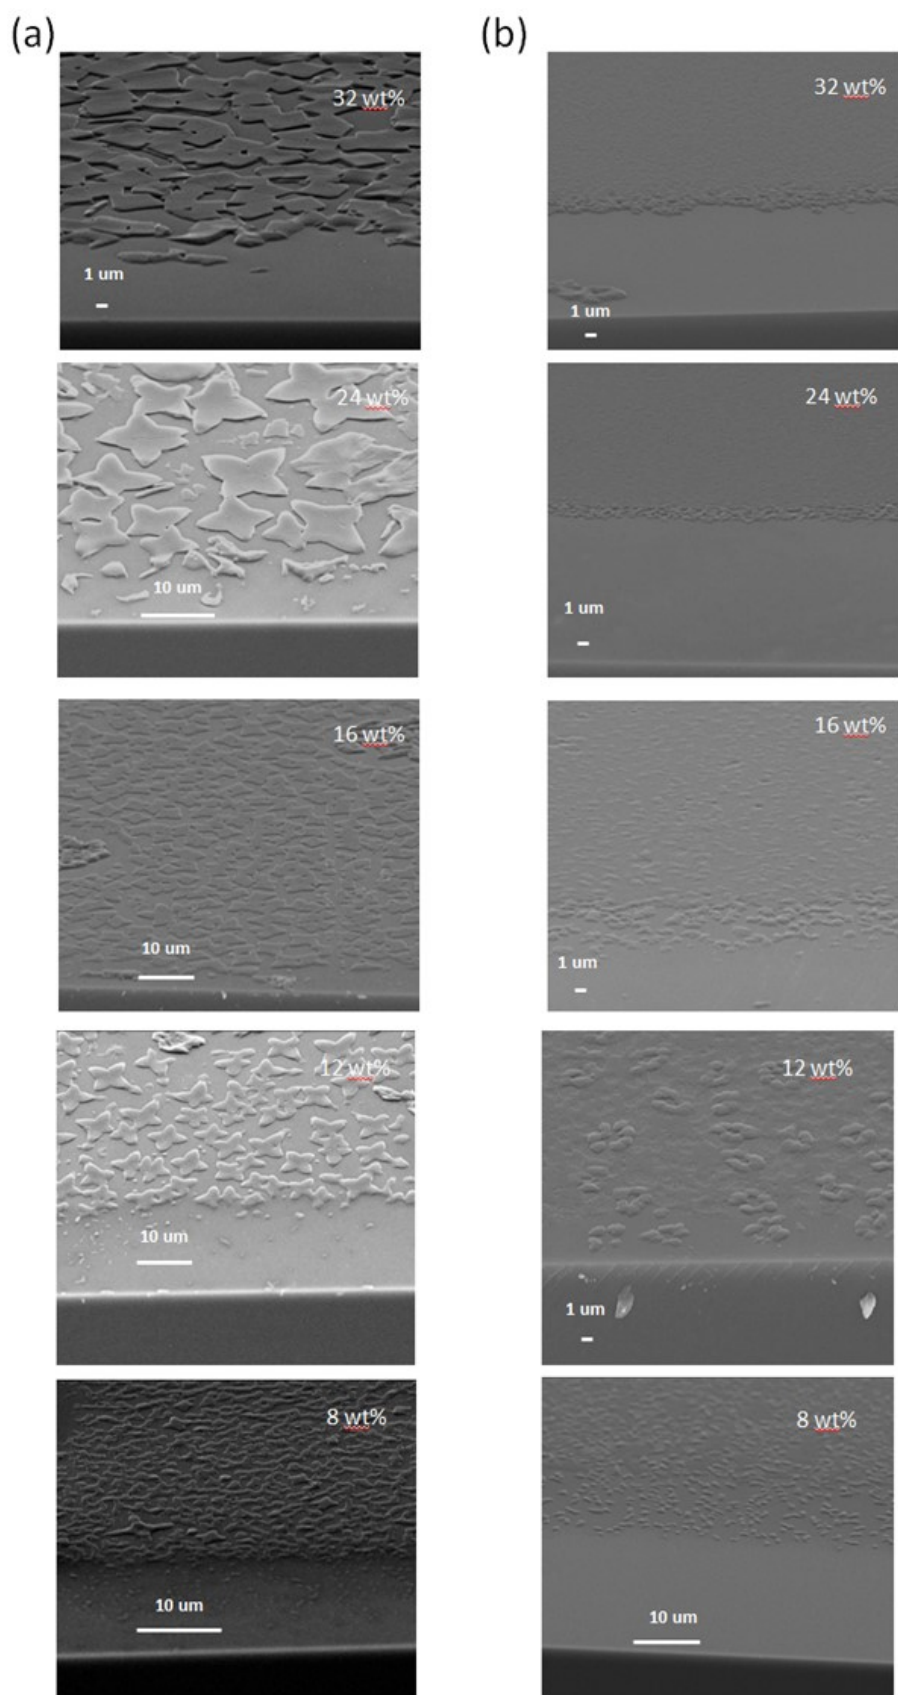

Figure S9: The incline view of SEM image of  $(S-BA)_2PbBr_4$  films (a) without and (b) with CB treatment for different concentration of chiral perovskite.

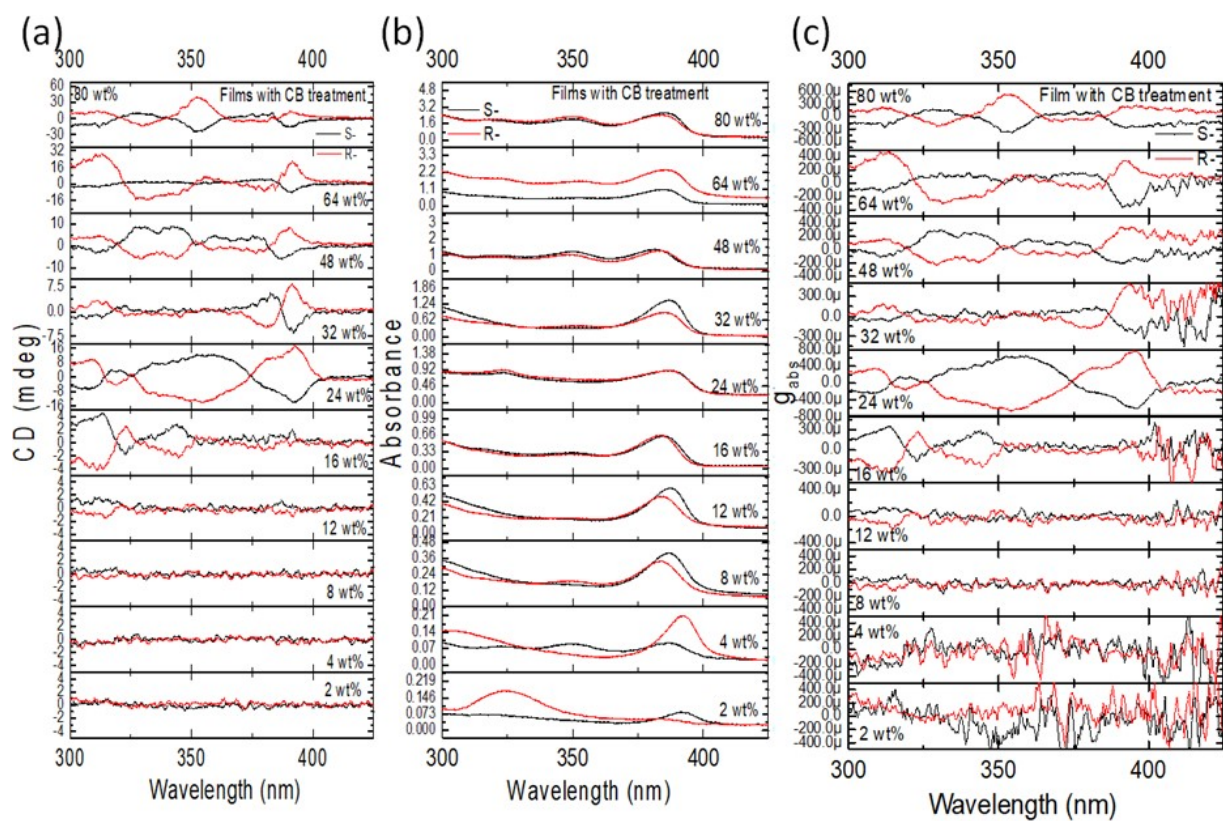

Figure S10: The(a) CD, (b)absorbance, and(c) gabs of the CB-treated (S-/R-BA)<sub>2</sub>PbBr<sub>4</sub> films for different concentration of chiral perovskite

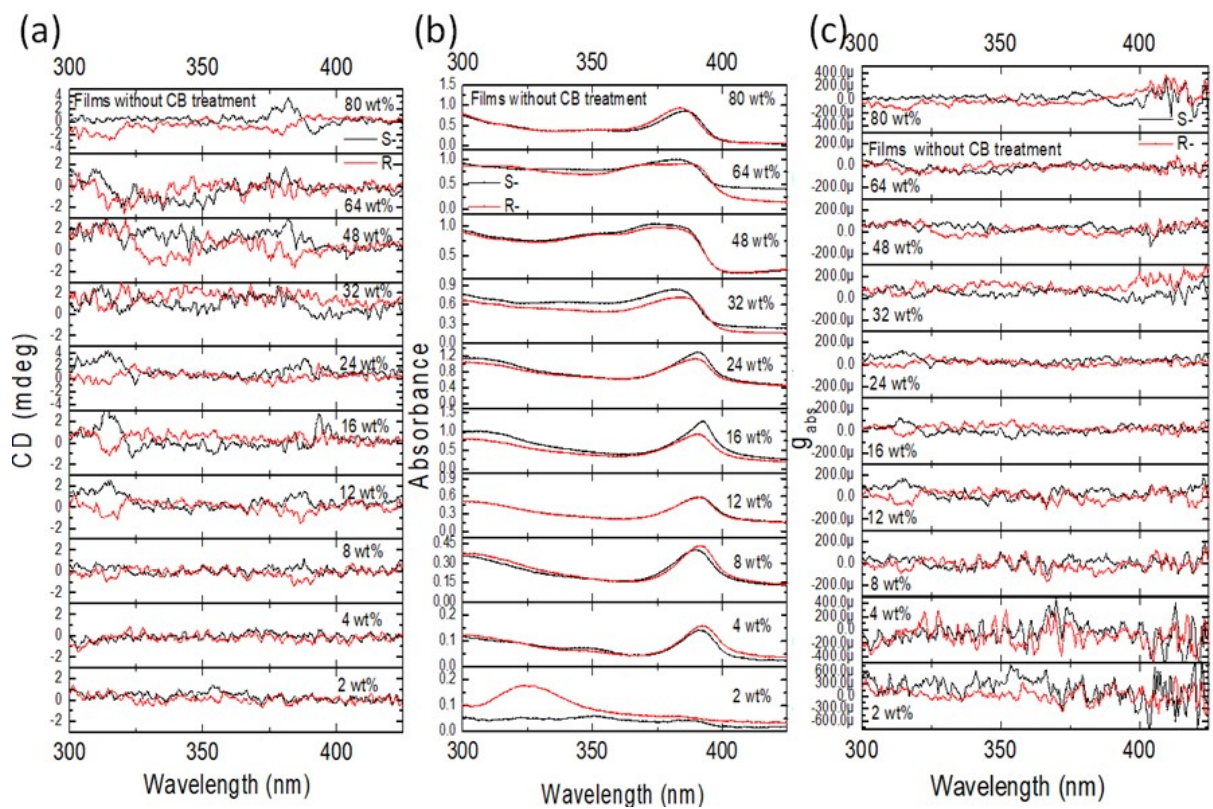

Figure S11: The (a) CD, (b) absorbance, and (c) gabs of the untreated  $(S-/R-BA)_2PbBr_4$  films for different concentration of chiral perovskite.

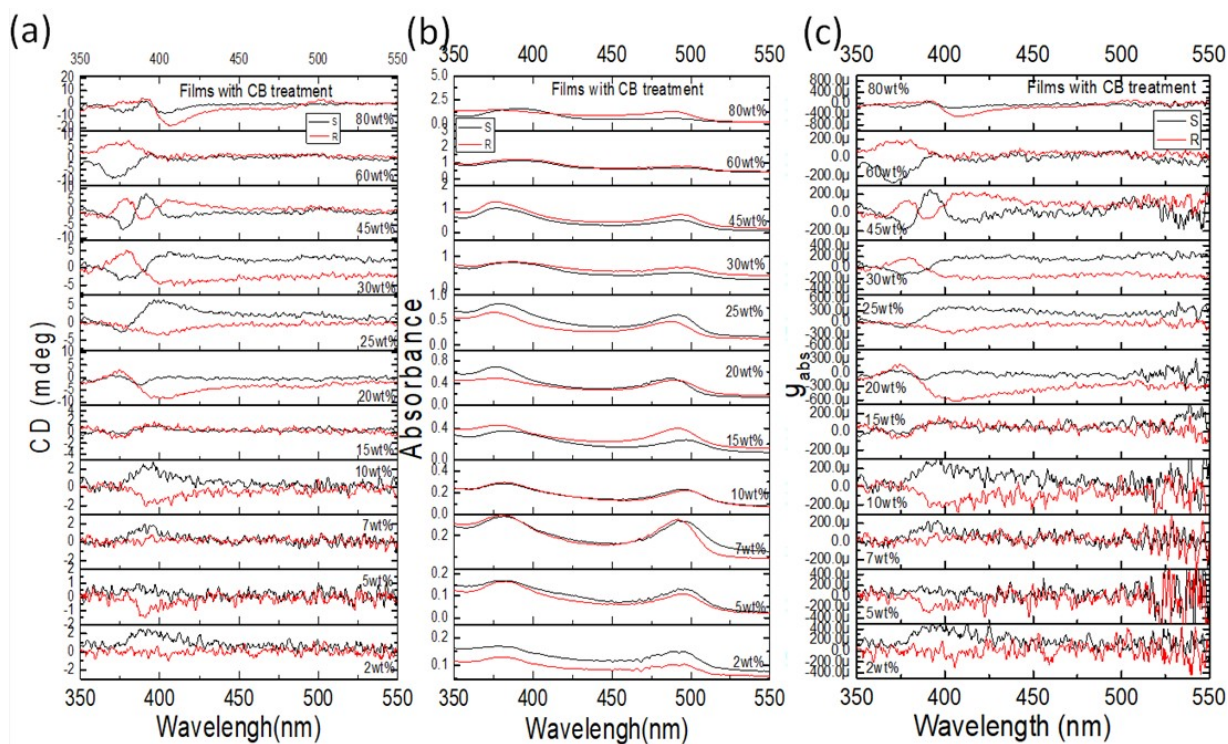

Figure S12: The (a) CD, (b) absorbance, and (c) gaps of the CB-treated (S-/R-BA)<sub>2</sub>PbI<sub>4</sub> films for different concentration of chiral perovskite

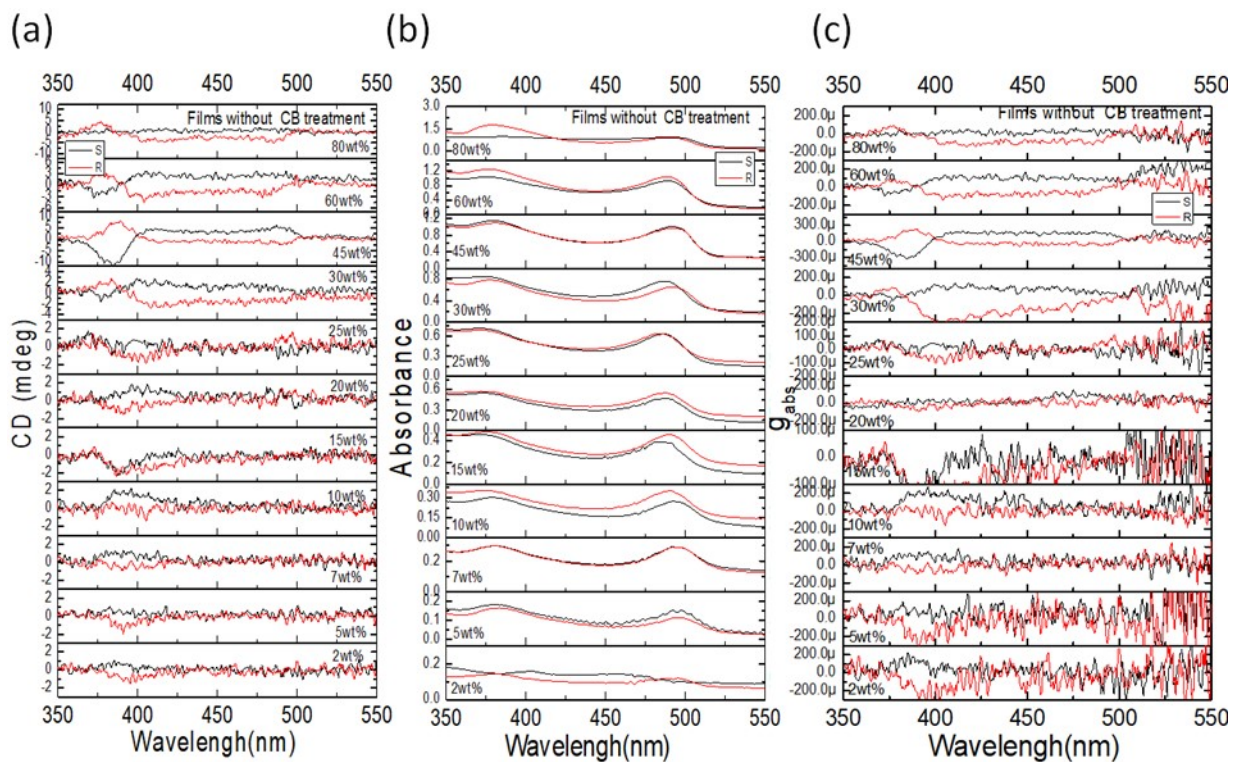

Figure S13: The (a) CD, (b) absorbance, and (c) gabs of the untreated (S-/R-BA)<sub>2</sub>PbI<sub>4</sub> films for different concentration of chiral perovskite

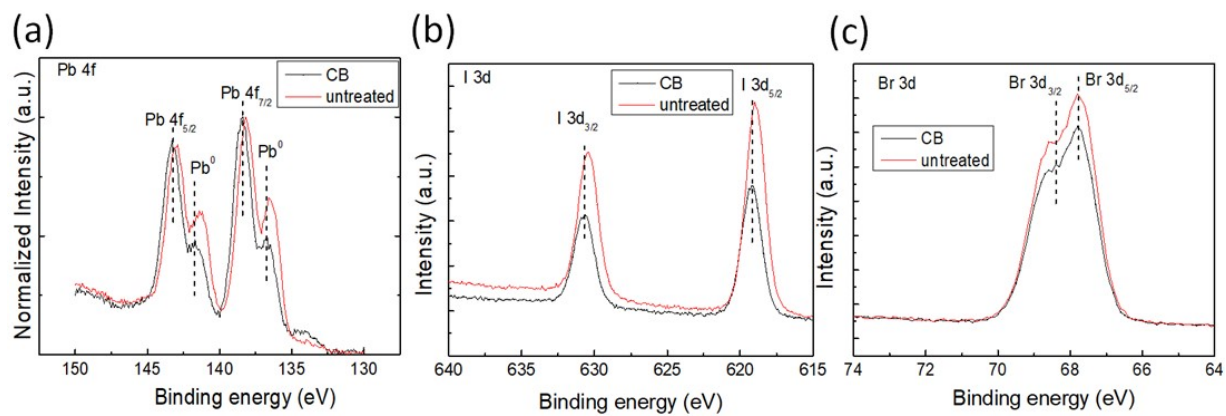

Figure S14: High-resolution XPS of (a) Pb 4f, (b) I 3d, and Br 3d peaks for the untreated and CF-treated films.

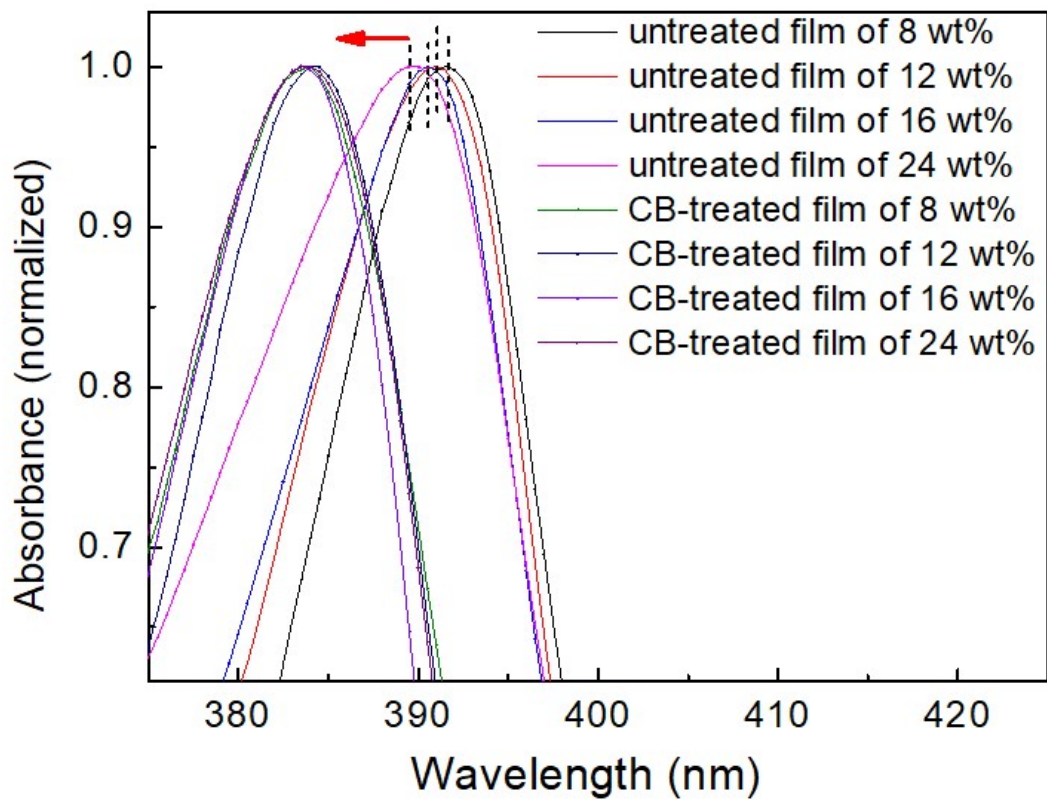

Figure S15: UV-vis absorption spectra of the CB-treated and untreated (R-BA)<sub>2</sub>PbBr<sub>4</sub> film with various concentration of 8 wt%, 12wt%, 16wt% and 24wt%.



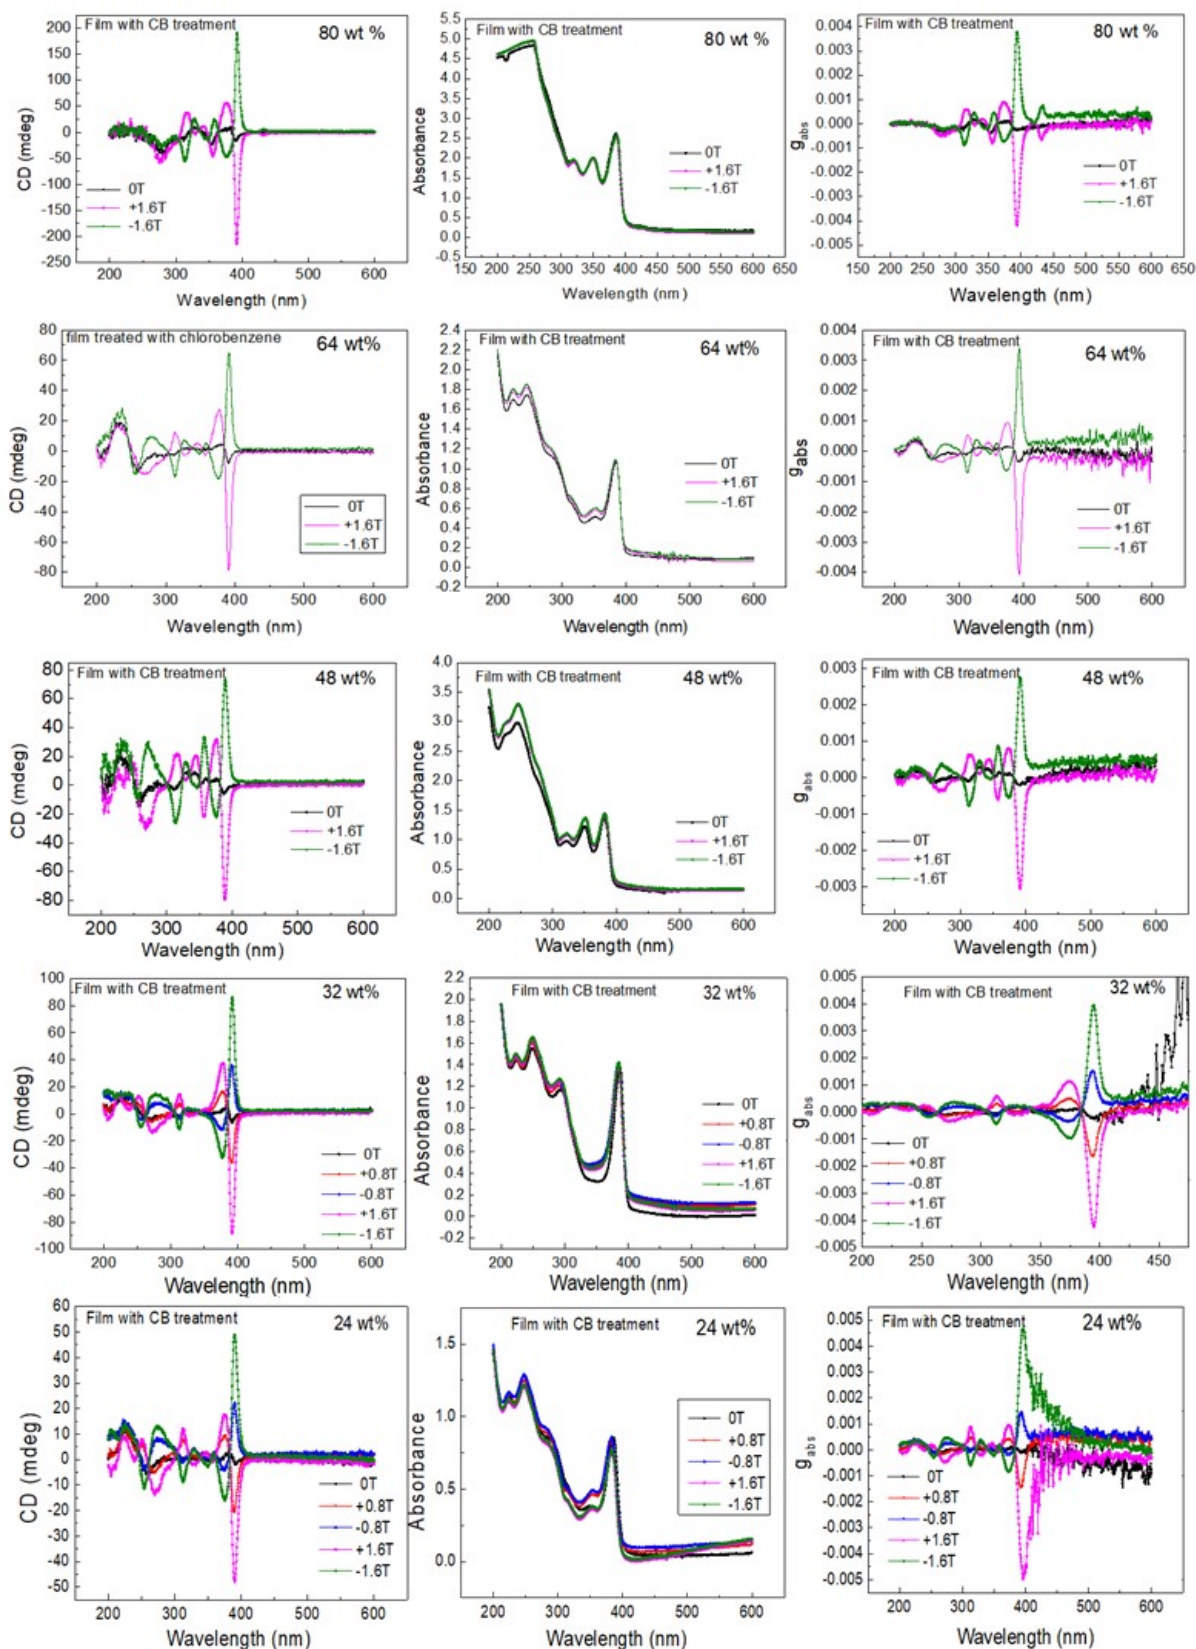

Figure S16: The CD, absorbance, and  $g_{abs}$  of the CB-treated  $(S\text{-}BA)_2\text{PbBr}_4$  films with CB treatment for different concentrations of chiral perovskite at the presence of a magnetic field.

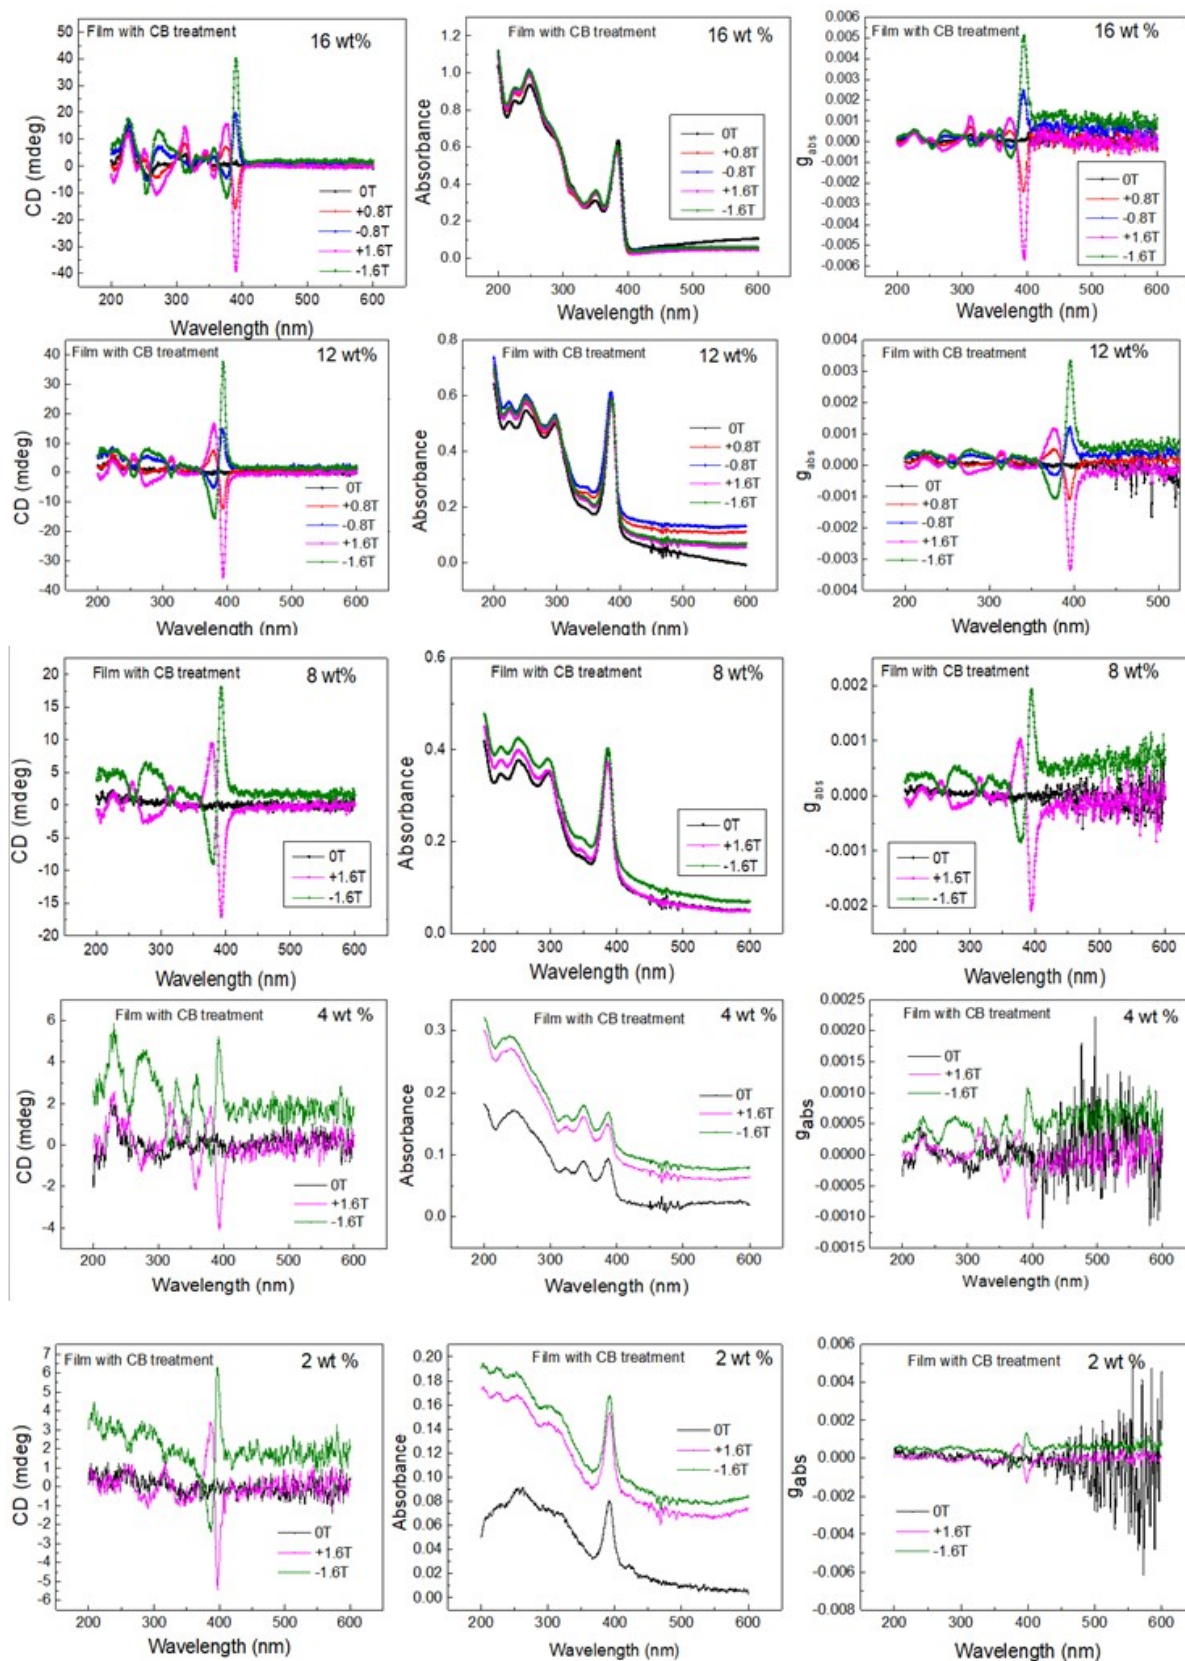

Figure S17: The CD, absorbance, and g<sub>abs</sub> of (S-BA)<sub>2</sub>PbBr<sub>4</sub> films with CB treatment for different concentrations of chiral perovskite at the presence of a magnetic field

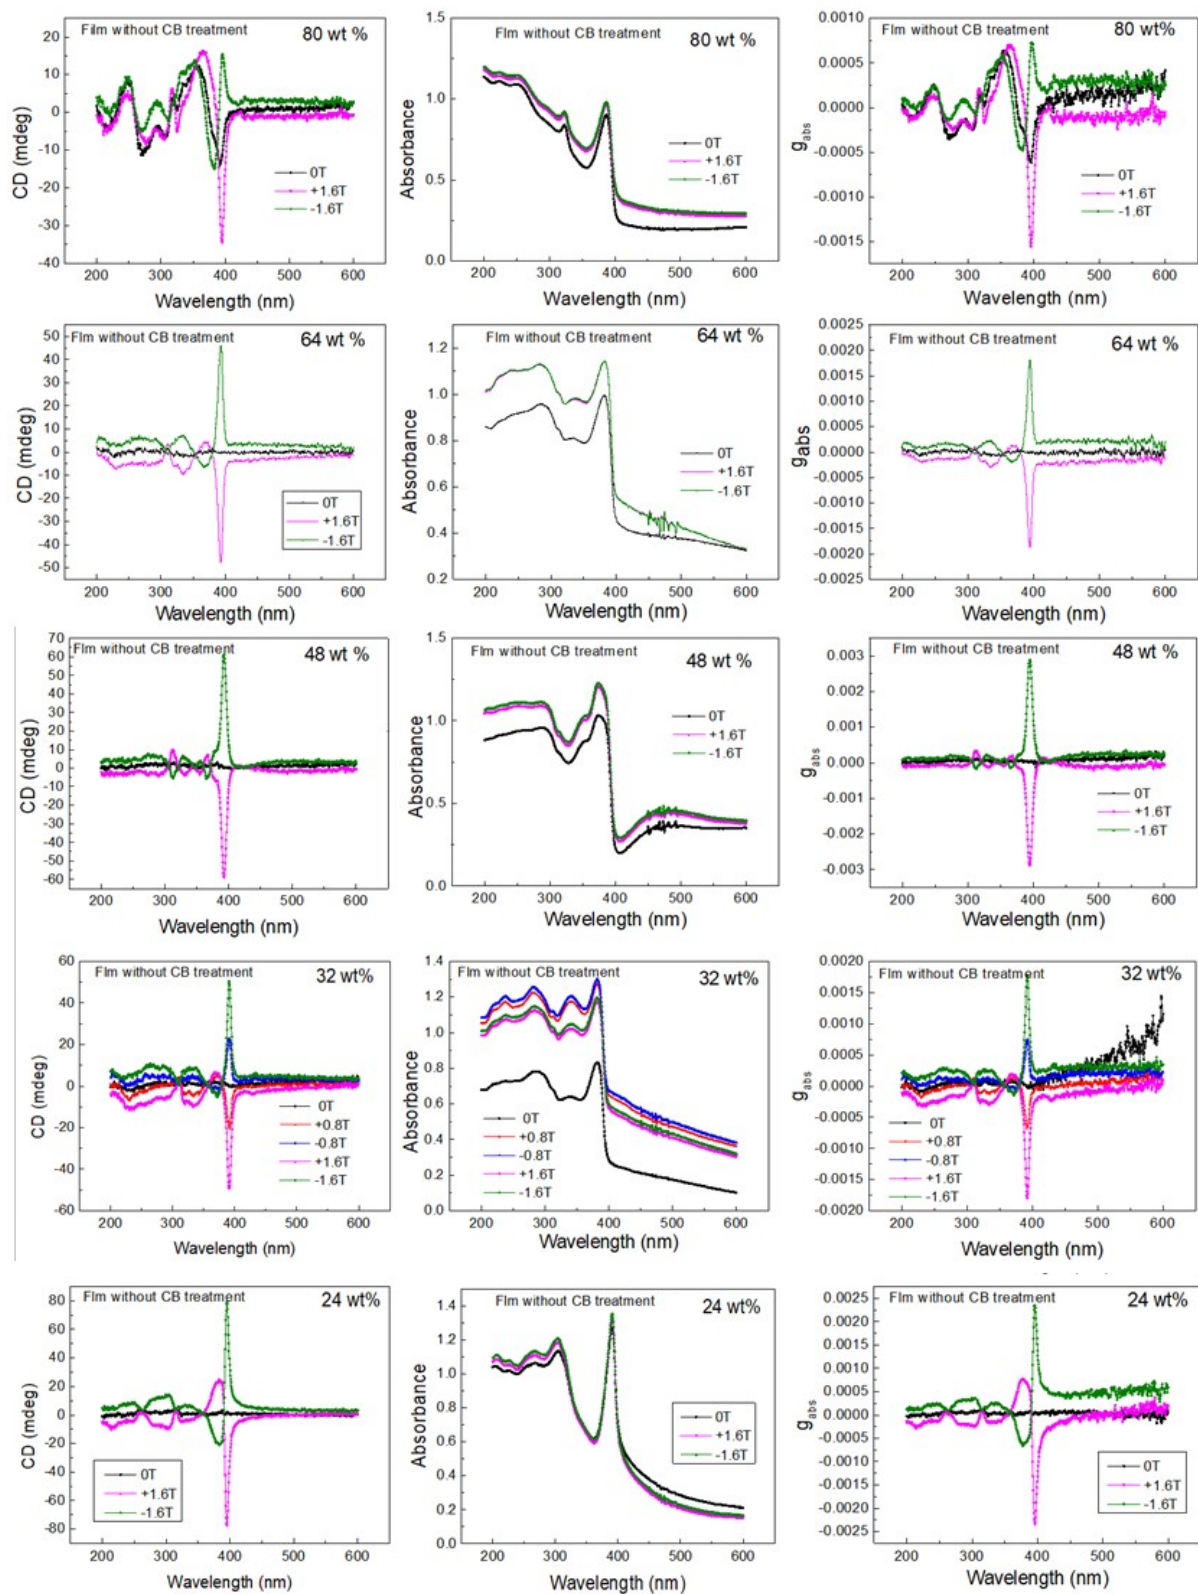

Figure S18: The CD, absorbance, and g<sub>abs</sub> of (S-BA)<sub>2</sub>PbBr<sub>4</sub> films without CB treatment for different concentrations of chiral perovskite at the presence of a magnetic field

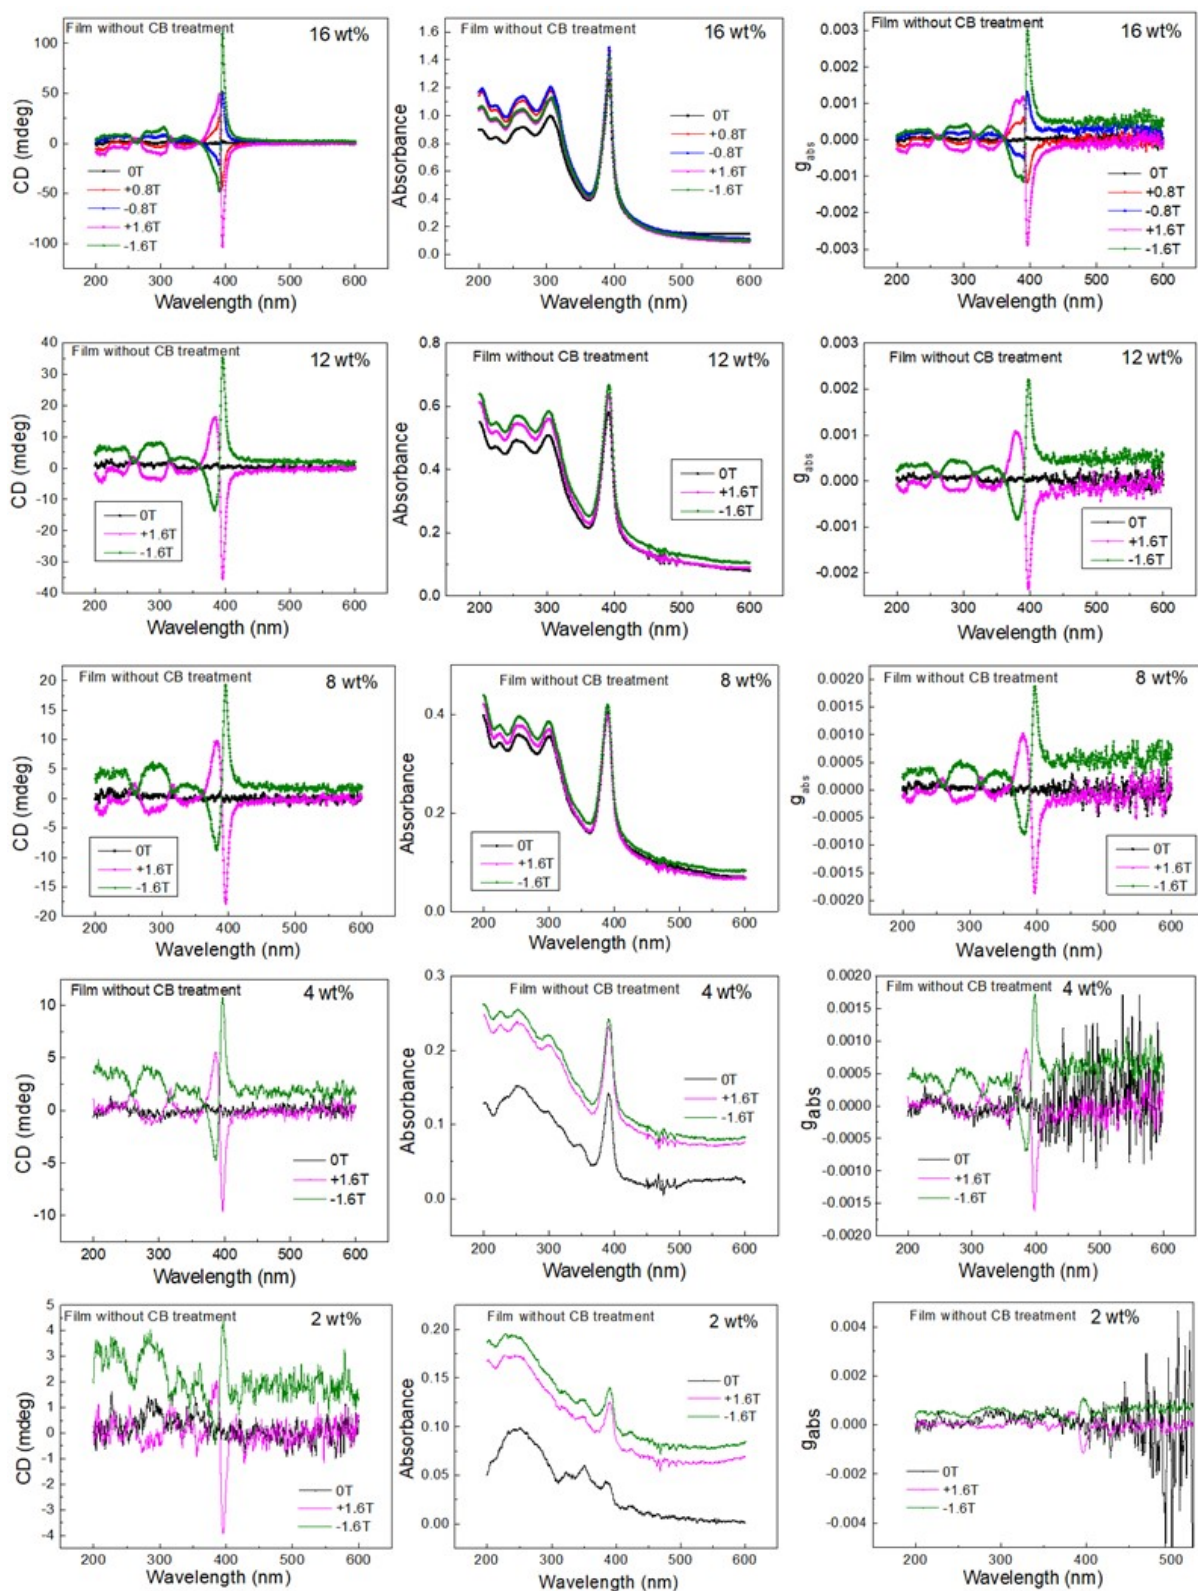

Figure S19: The CD, absorbance, and  $g_{abs}$  of  $(S-BA)_2PbBr_4$  films without CB treatment for different concentrations of chiral perovskite at the presence of a magnetic field

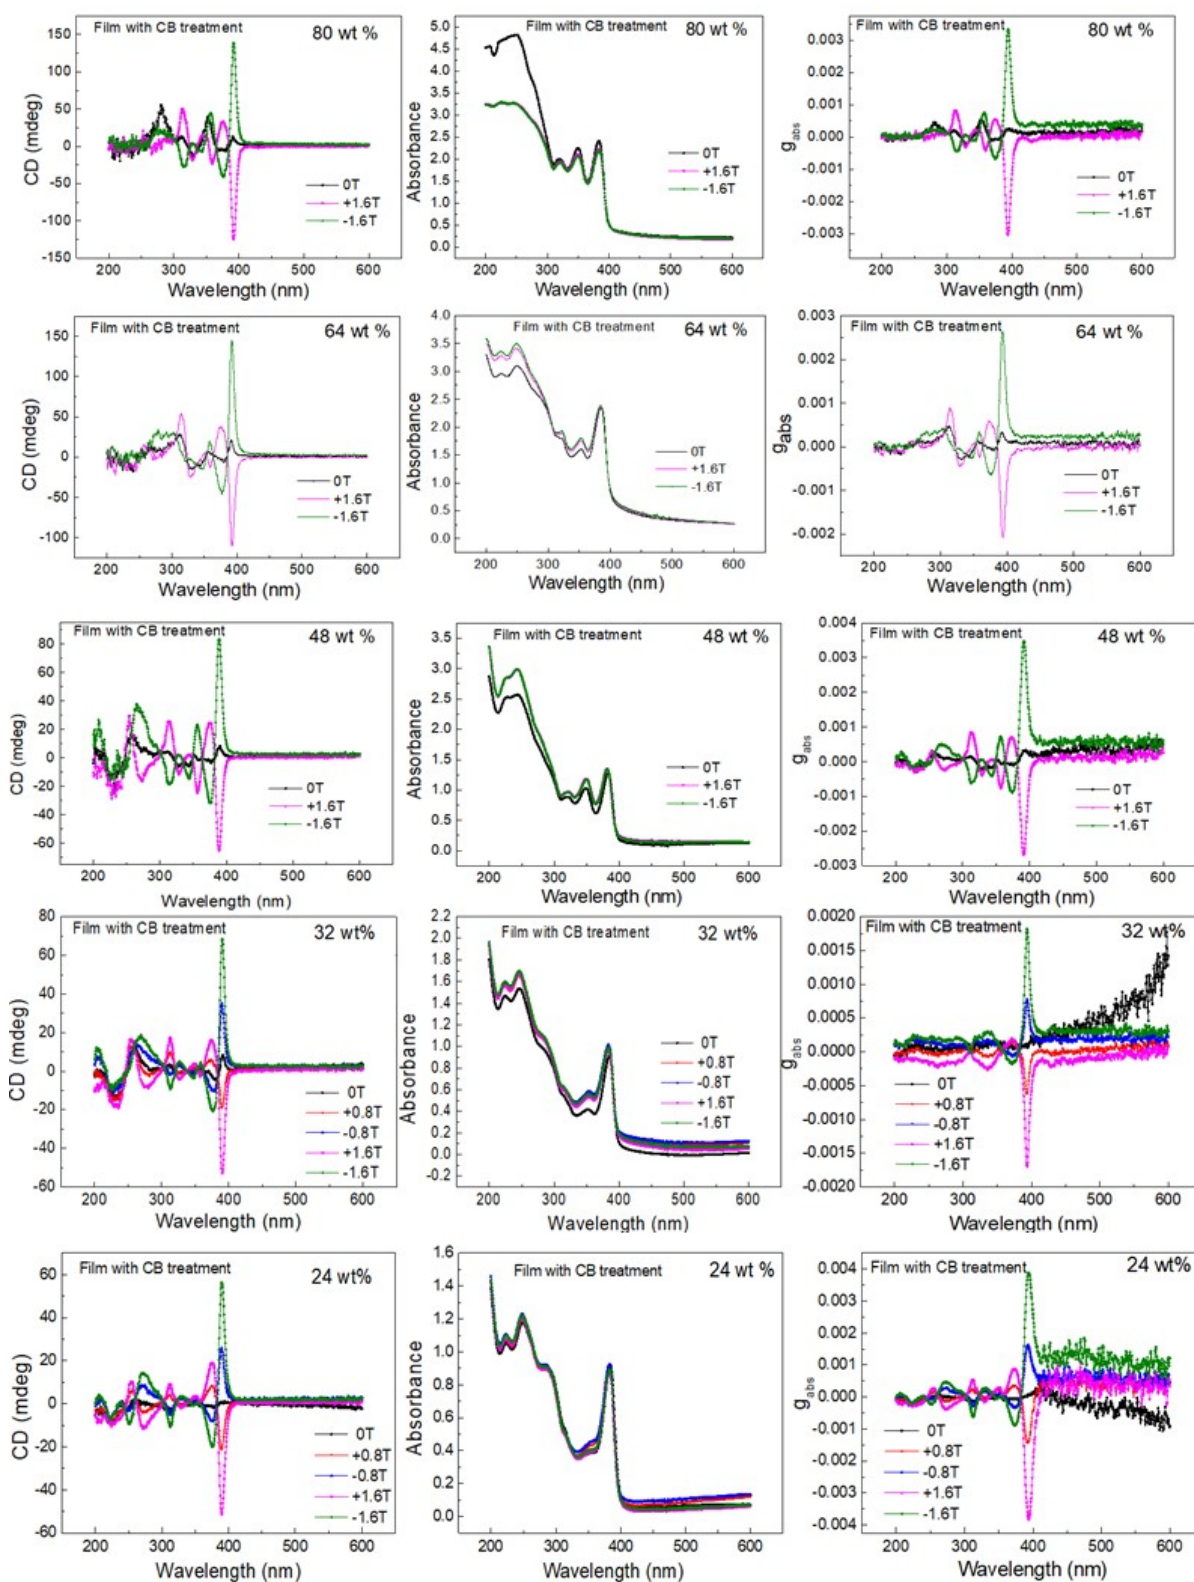

Figure S20: The CD, absorbance, and  $g_{abs}$  of  $(R-BA)_2PbBr_4$  films with CB treatment for different concentrations of chiral perovskite at the presence of a magnetic field

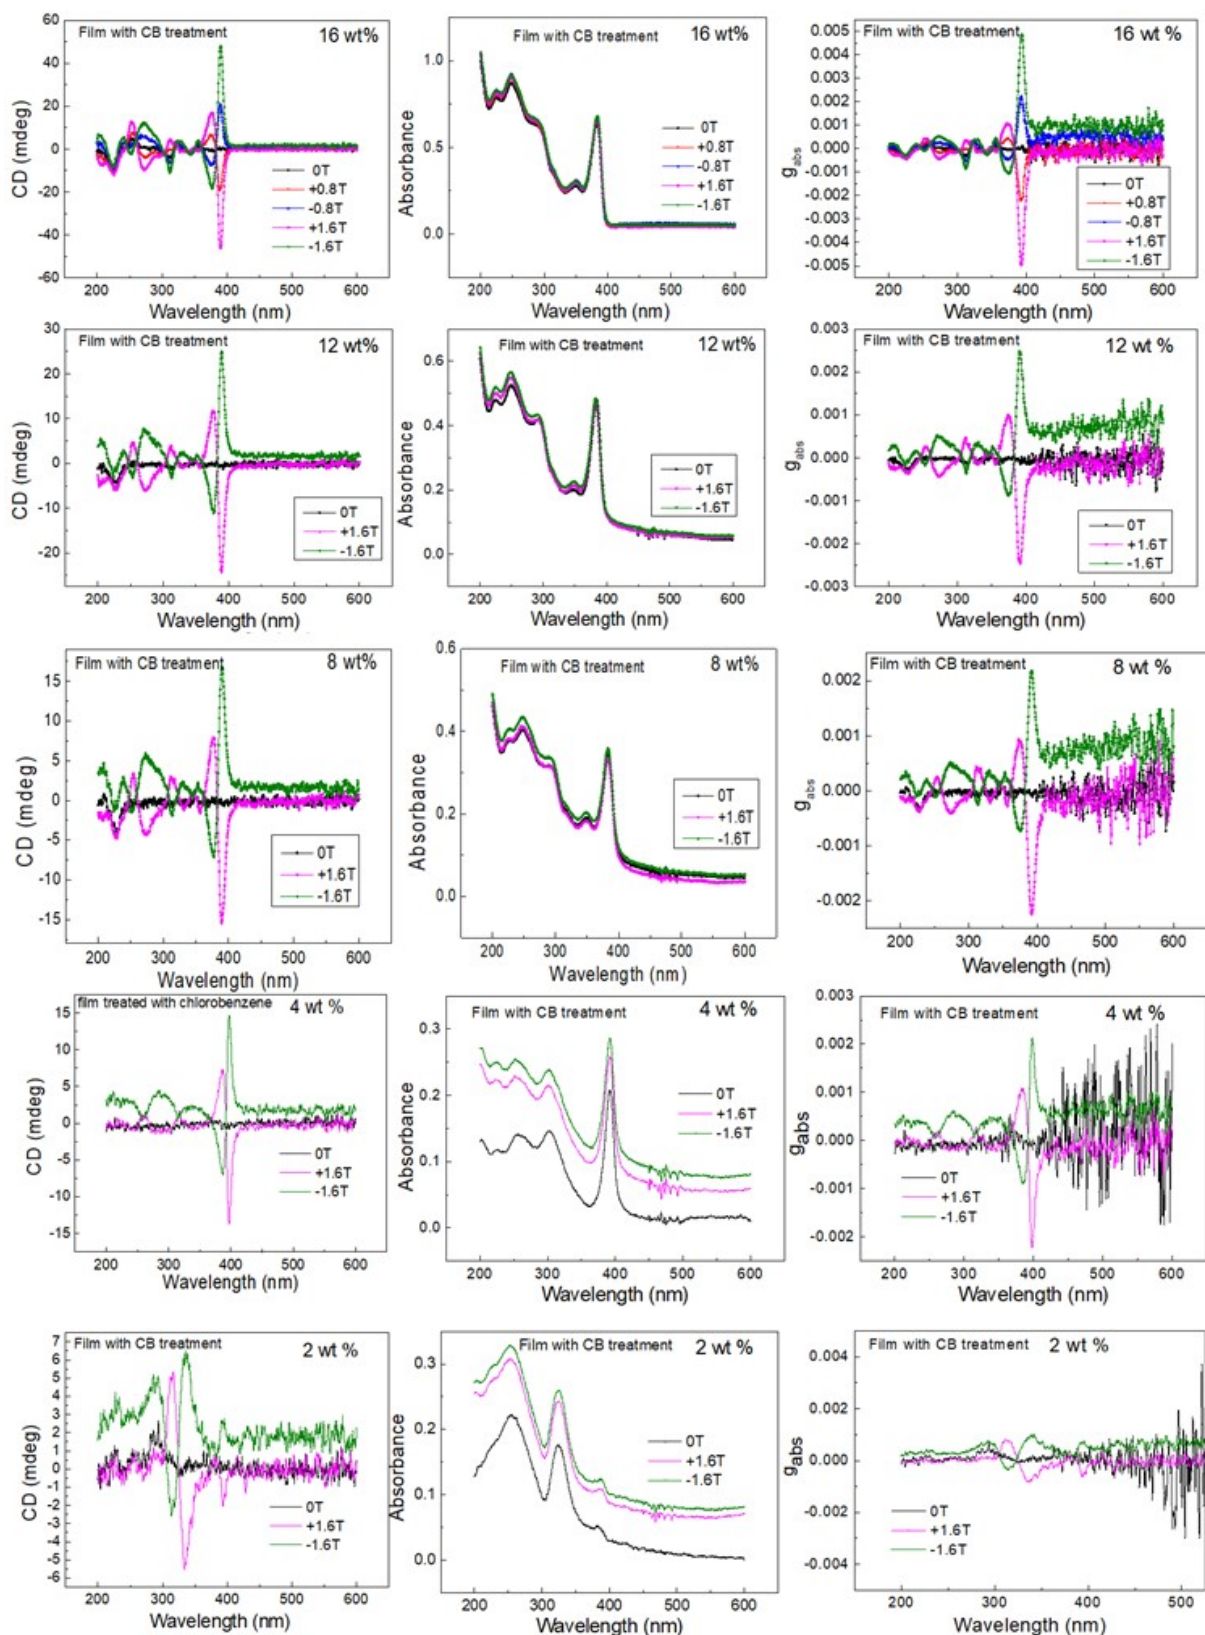

Figure S21: The CD, absorbance, and  $g_{abs}$  of  $(R-BA)_2PbBr_4$  films with CB treatment for different concentrations of chiral perovskite at the presence of a magnetic field

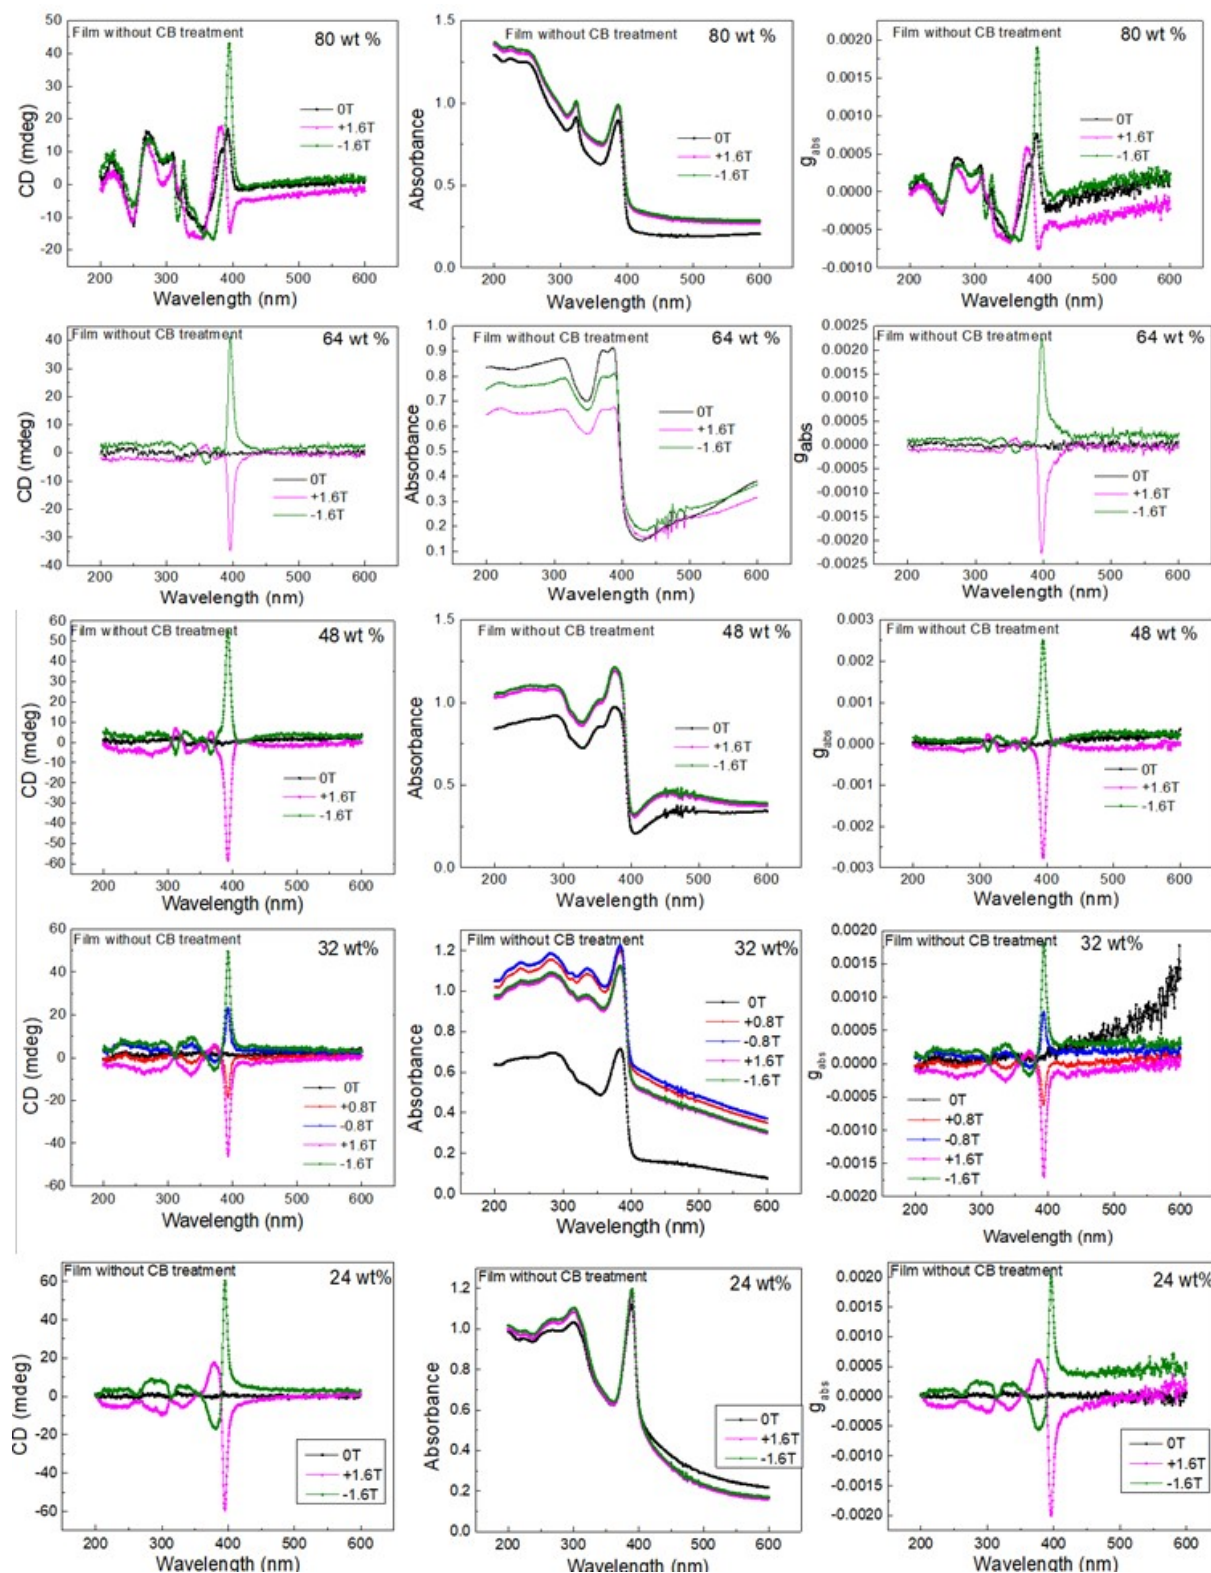

Figure S22: The CD, absorbance, and  $g_{abs}$  of  $(R\text{-BA})_2\text{PbBr}_4$  films without CB treatment for different concentrations of chiral perovskite at the presence of a magnetic field

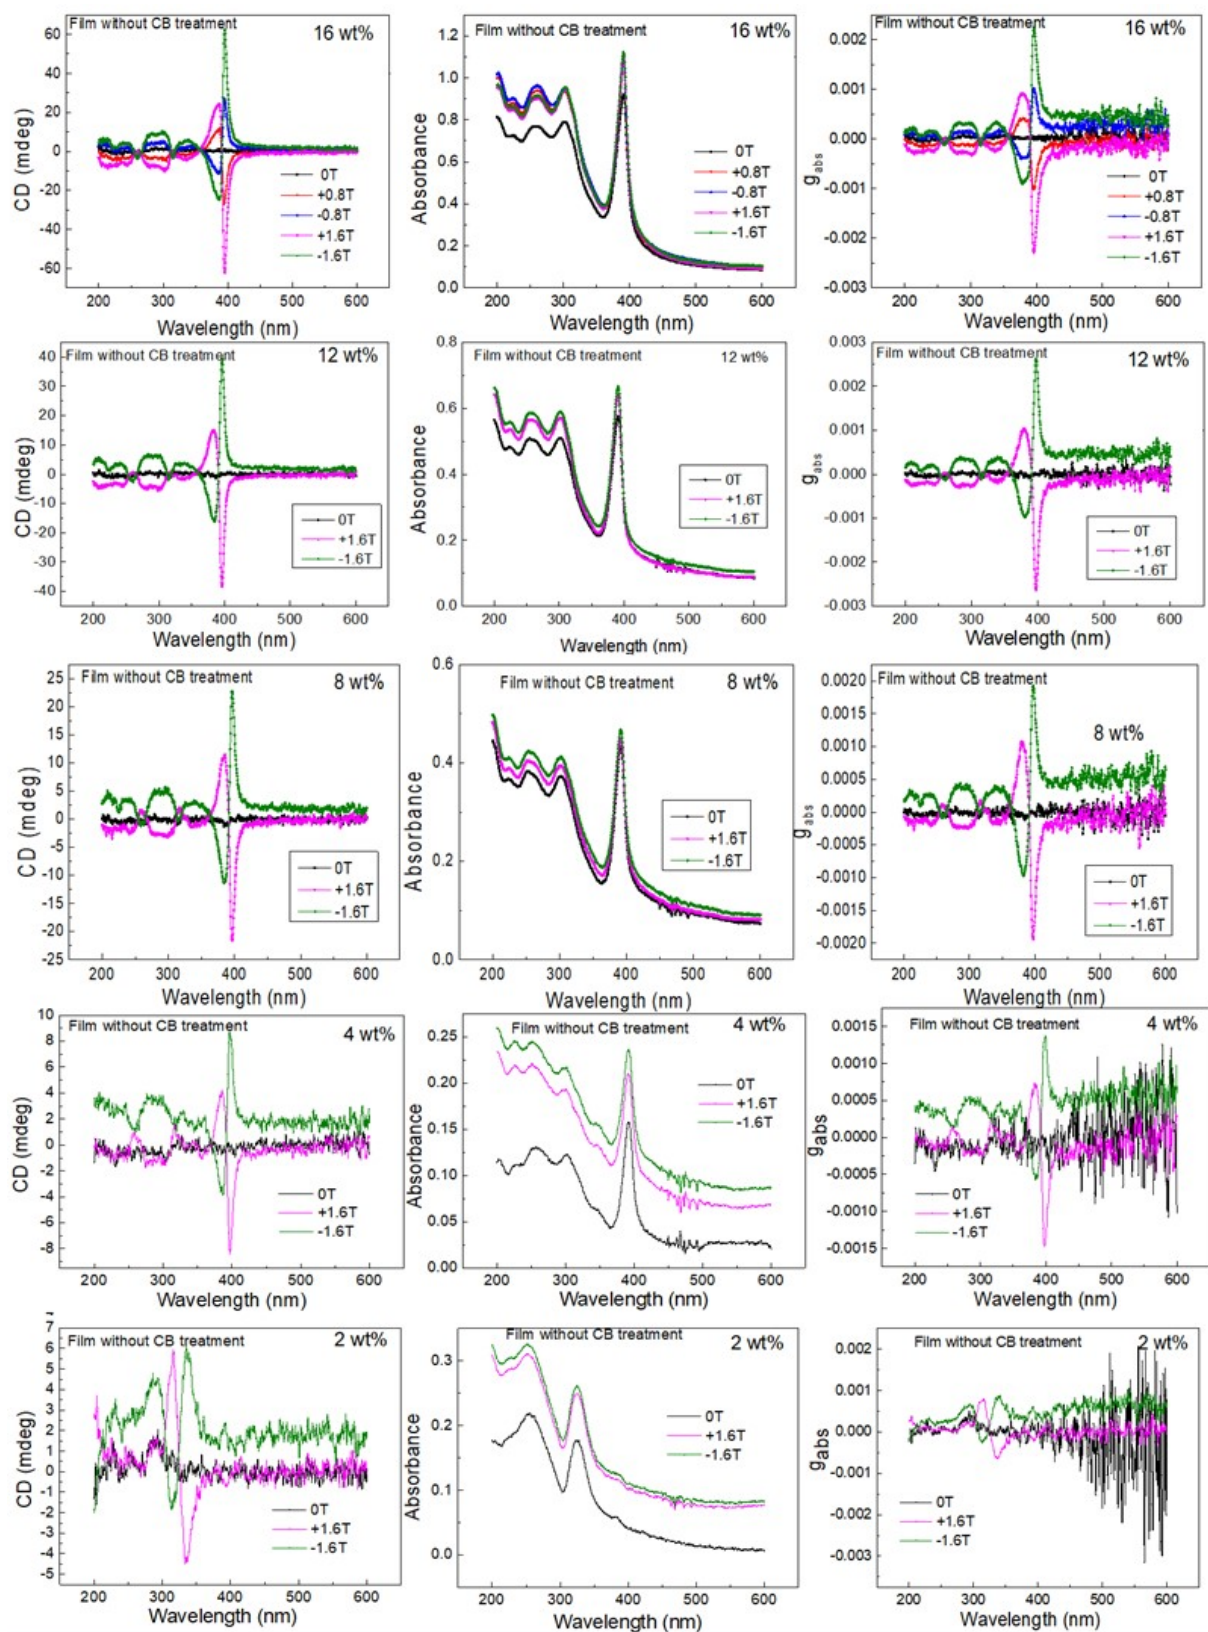

Figure S23: The CD, absorbance, and  $g_{abs}$  of  $(R\text{-BA})_2\text{PbBr}_4$  films without CB treatment for different concentrations of chiral perovskite at the presence of a magnetic field



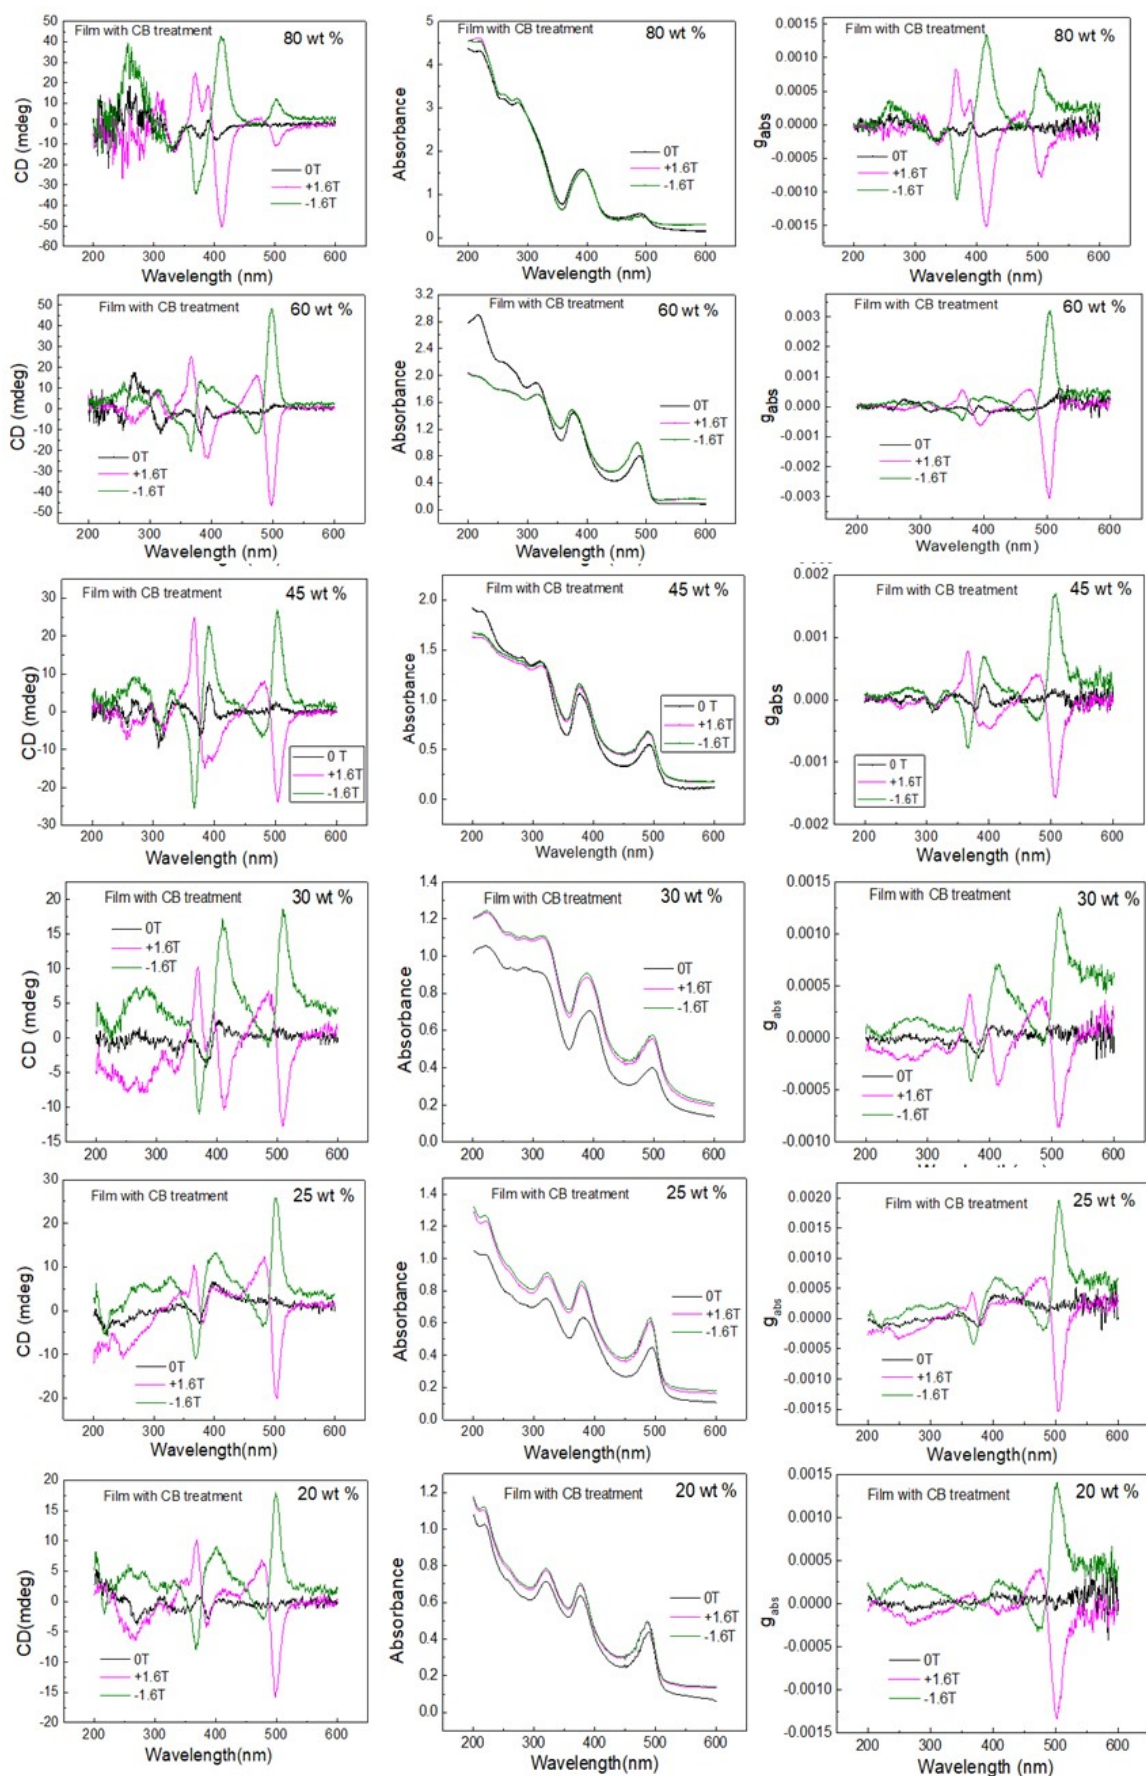

Figure S24: The CD, absorbance, and g<sub>abs</sub> of (S-BA)<sub>2</sub>PbI<sub>4</sub> films with CB treatment for different concentrations of chiral perovskite at the presence of a magnetic field.

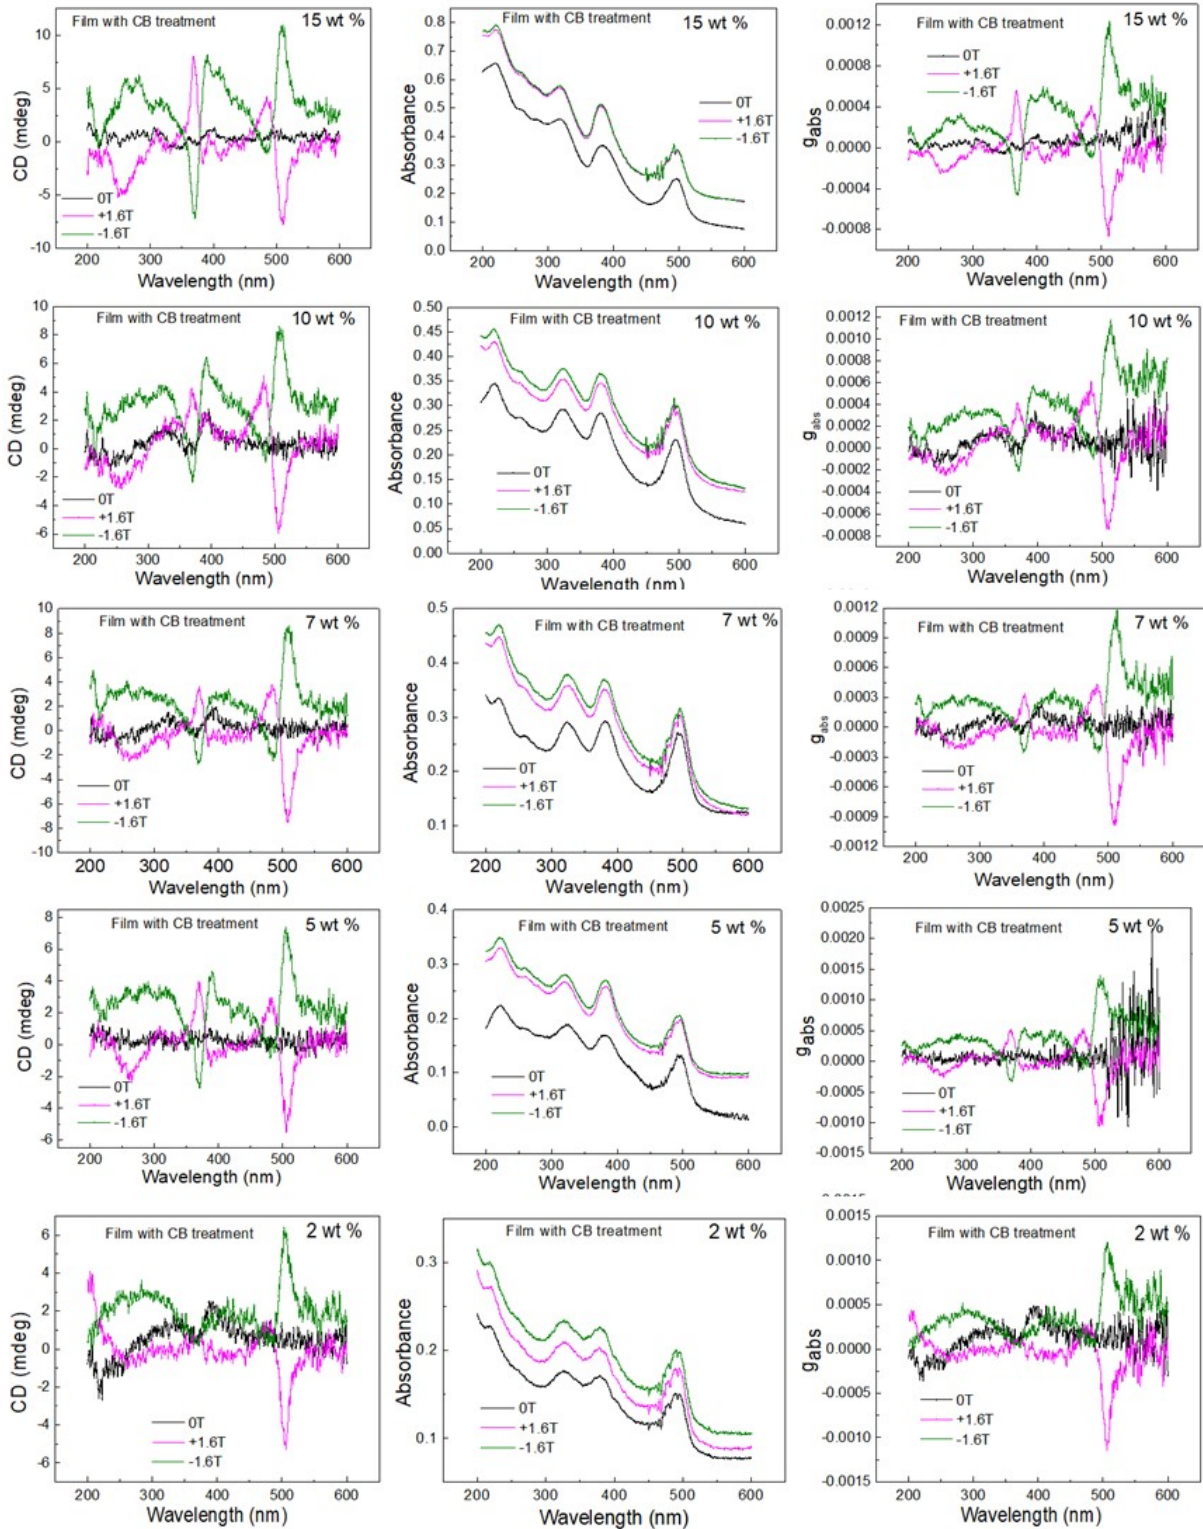

Figure S25: The CD, absorbance, and g<sub>abs</sub> of (S-BA)<sub>2</sub>PbI<sub>4</sub> films with CB treatment for different concentrations of chiral perovskite at the presence of a magnetic field.

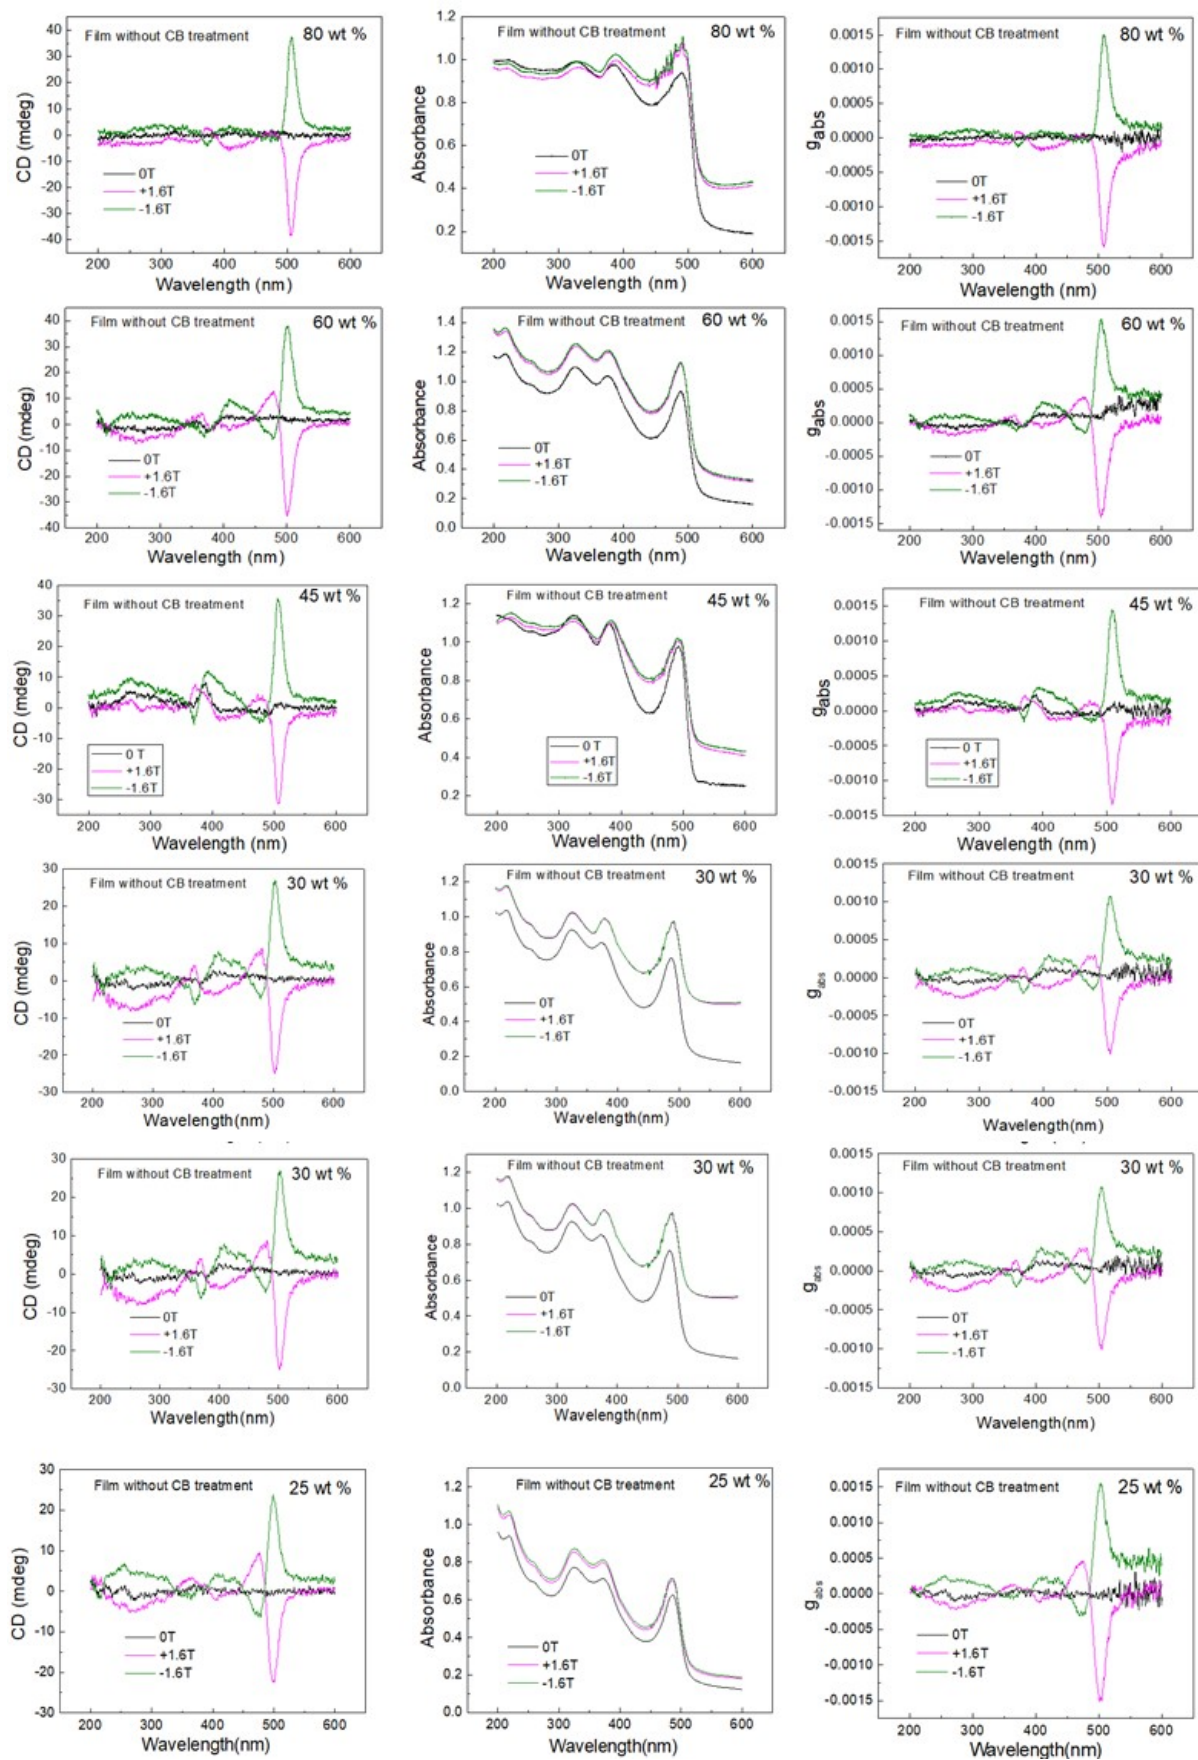

Figure S26: The CD, absorbance, and  $g_{\text{abs}}$  of  $(S\text{-BA})_2\text{PbI}_4$  films without CB treatment for different concentrations of chiral perovskite at the presence of a magnetic field

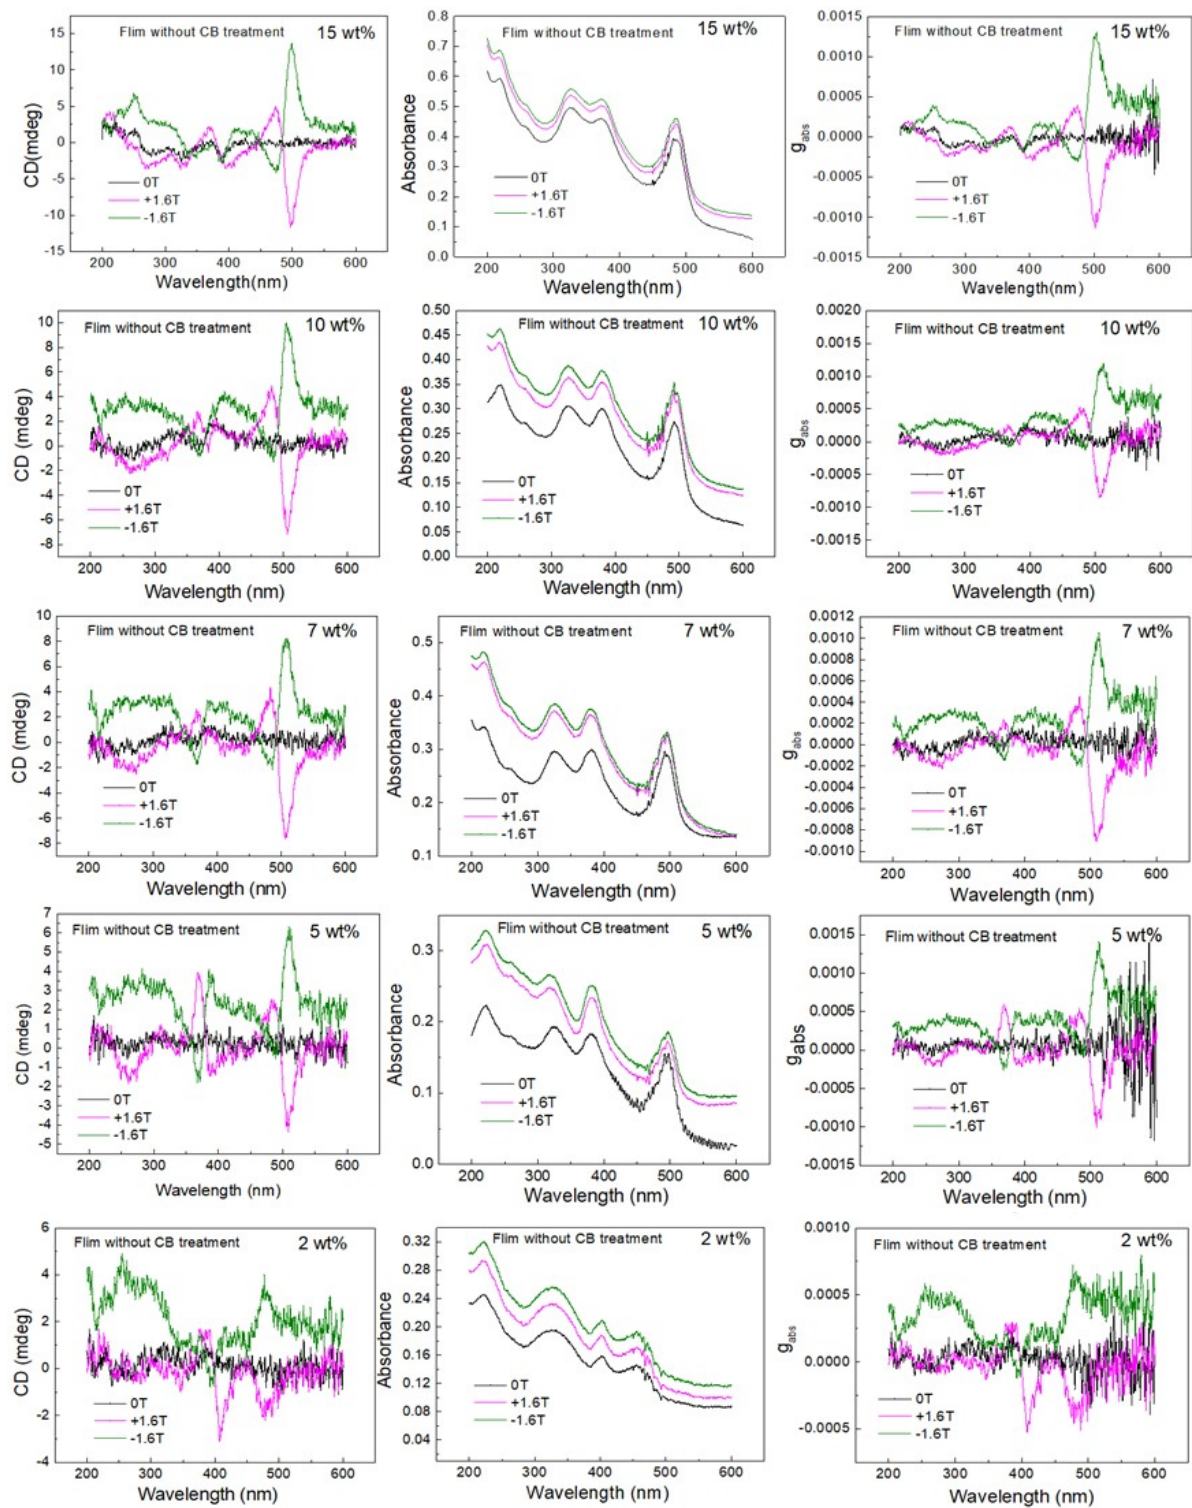

Figure S27: The CD, absorbance, and  $g_{\text{abs}}$  of  $(S\text{-BA})_2\text{PbI}_4$  films without CB treatment for different concentrations of chiral perovskite at the presence of a magnetic field

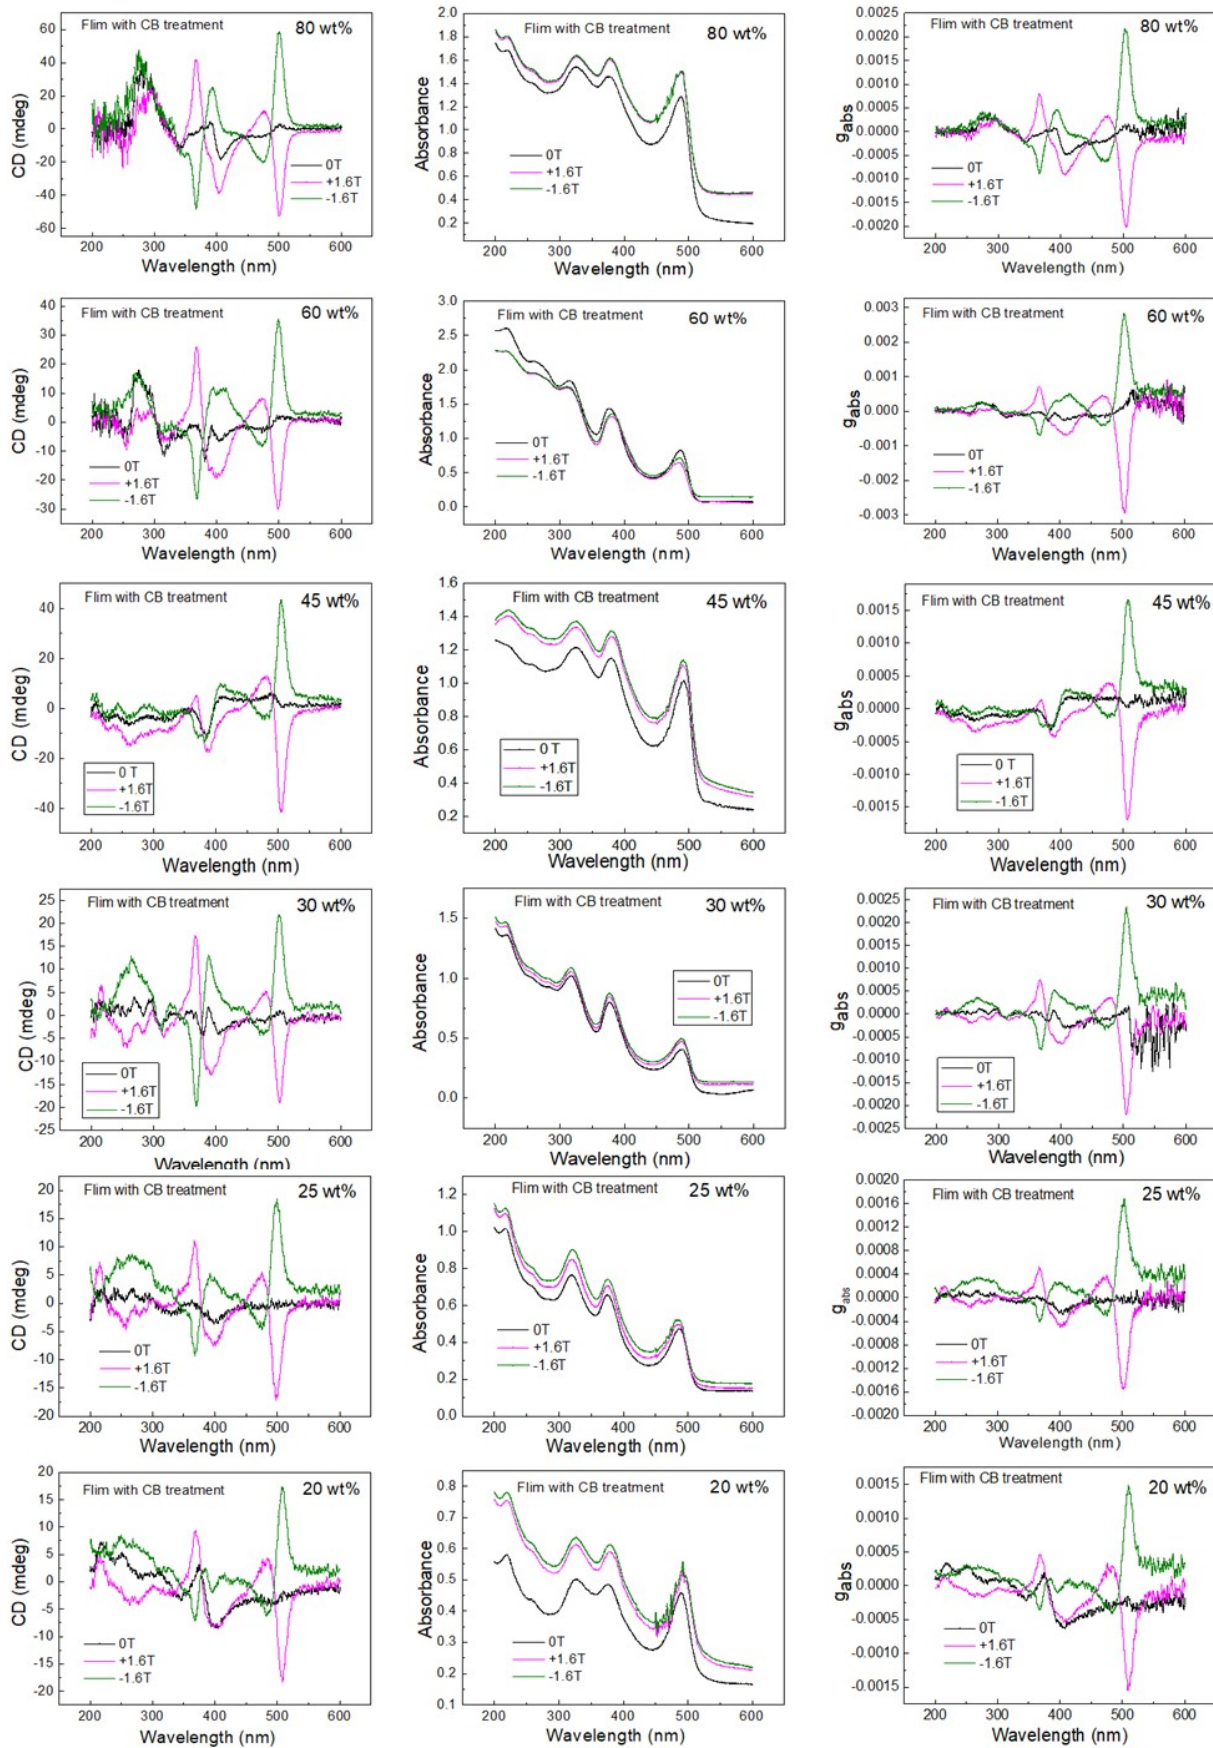

Figure S28: The CD, absorbance, and  $g_{\text{abs}}$  of  $(R\text{-BA})_2\text{PbI}_4$  films with CB treatment for different concentrations of chiral perovskite at the presence of a magnetic field

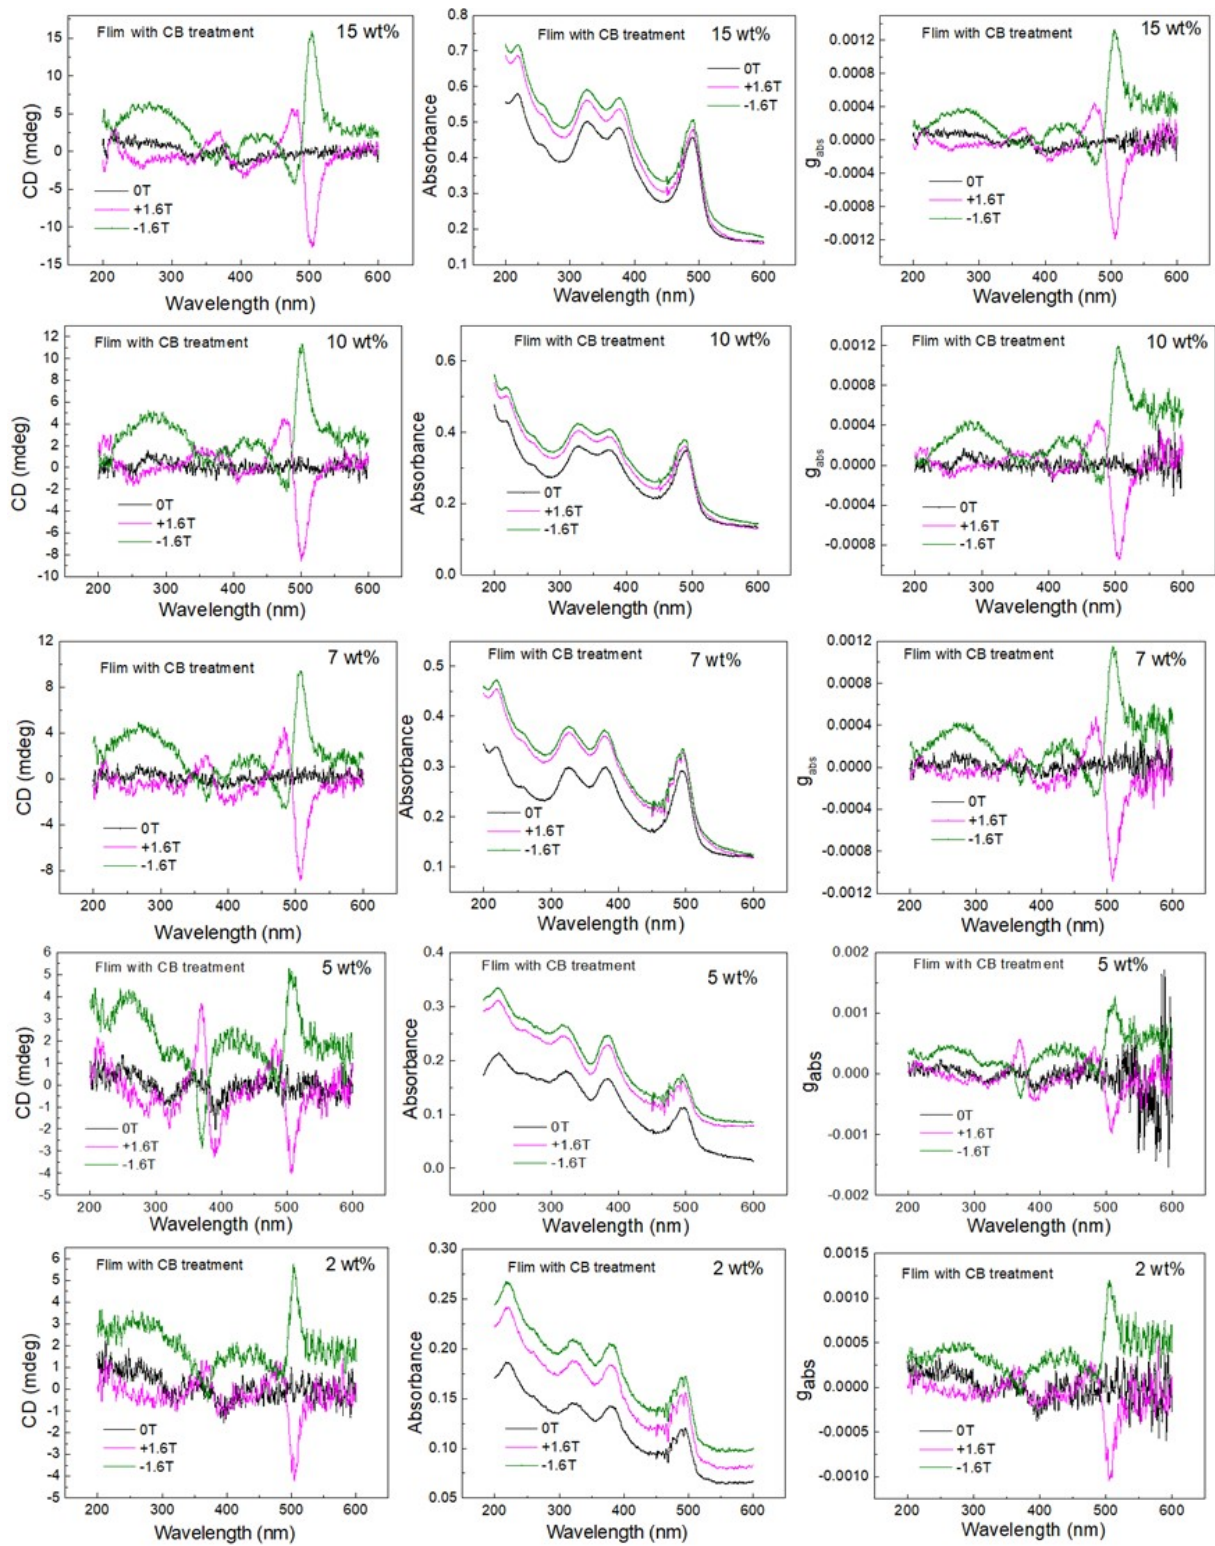

Figure S29: The CD, absorbance, and g<sub>abs</sub> of (R-BA)<sub>2</sub>PbI<sub>4</sub> films with CB treatment for different concentrations of chiral perovskite at the presence of a magnetic field

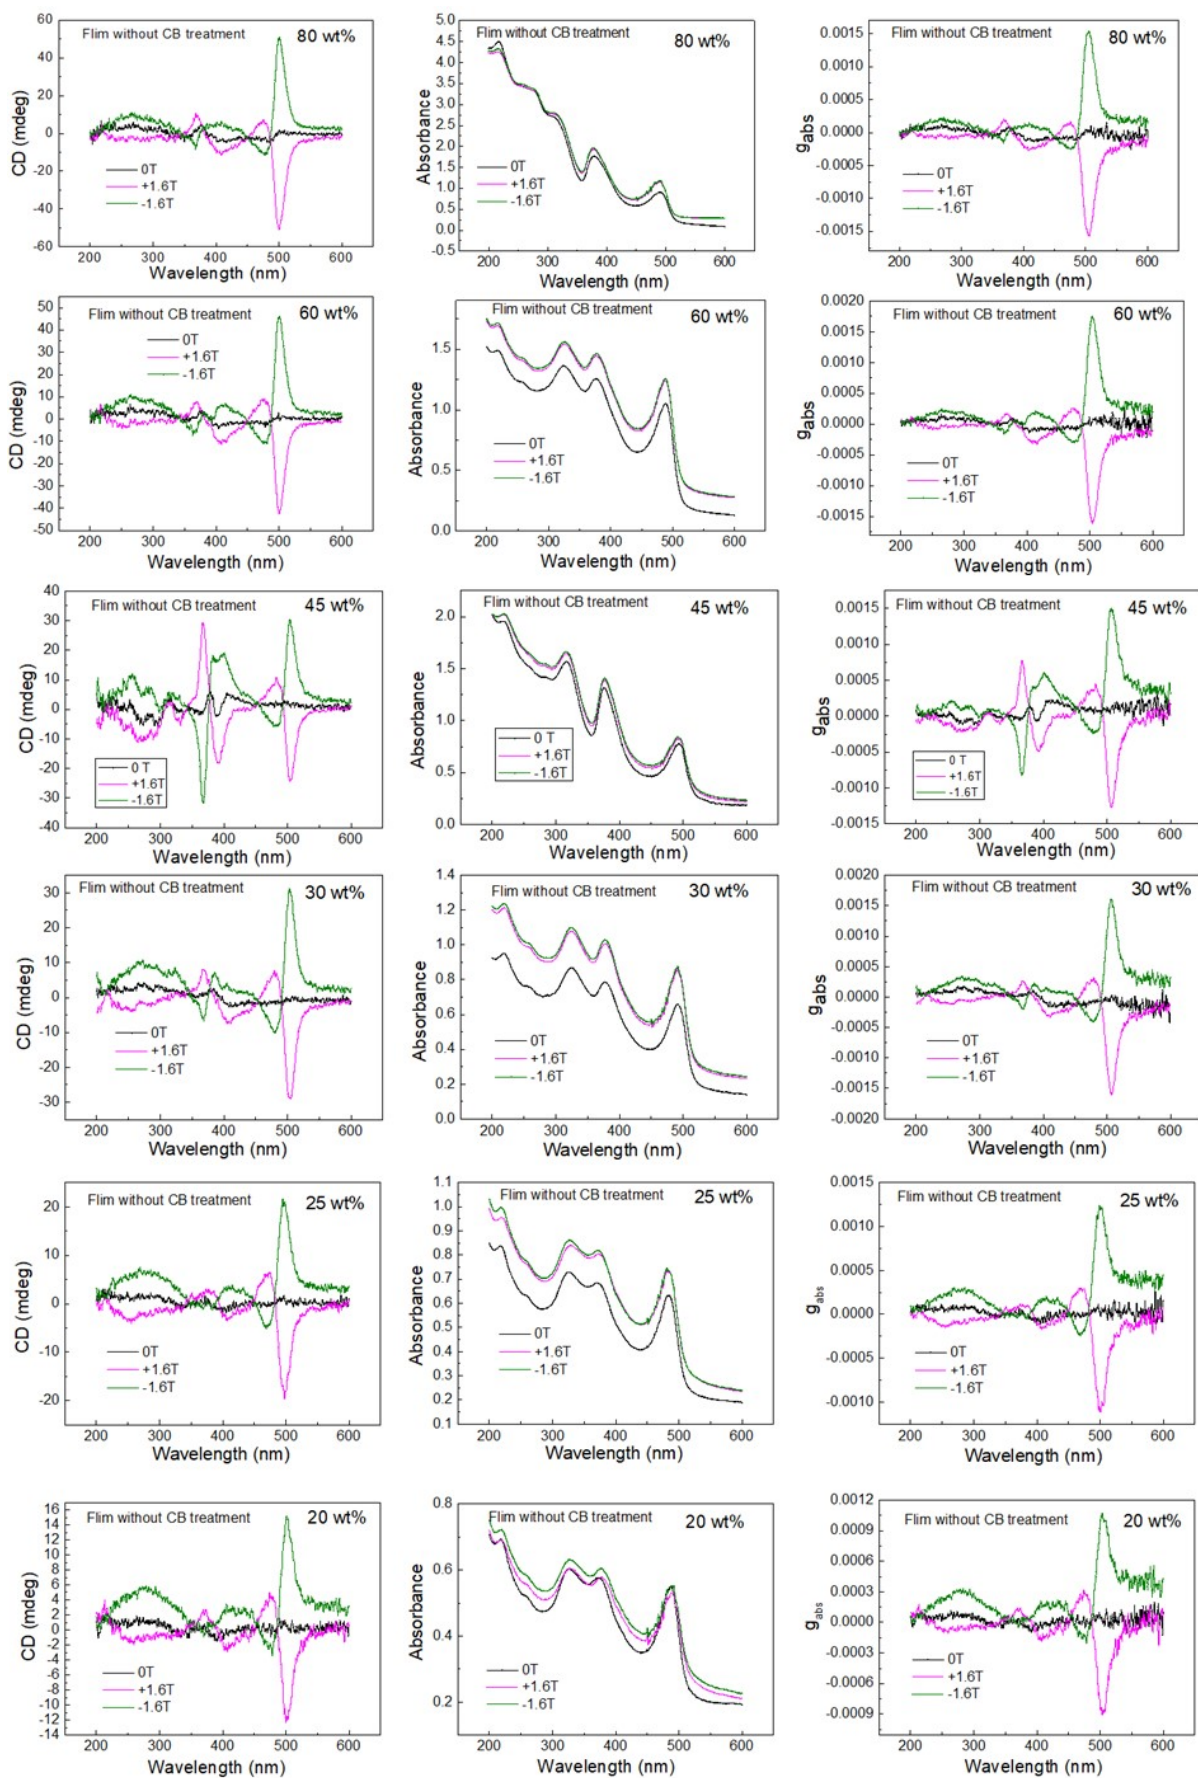

Figure S30: The CD, absorbance, and  $g_{\text{abs}}$  of  $(R\text{-BA})_2\text{PbI}_4$  films without CB treatment for different concentrations of chiral perovskite at the presence of a magnetic field

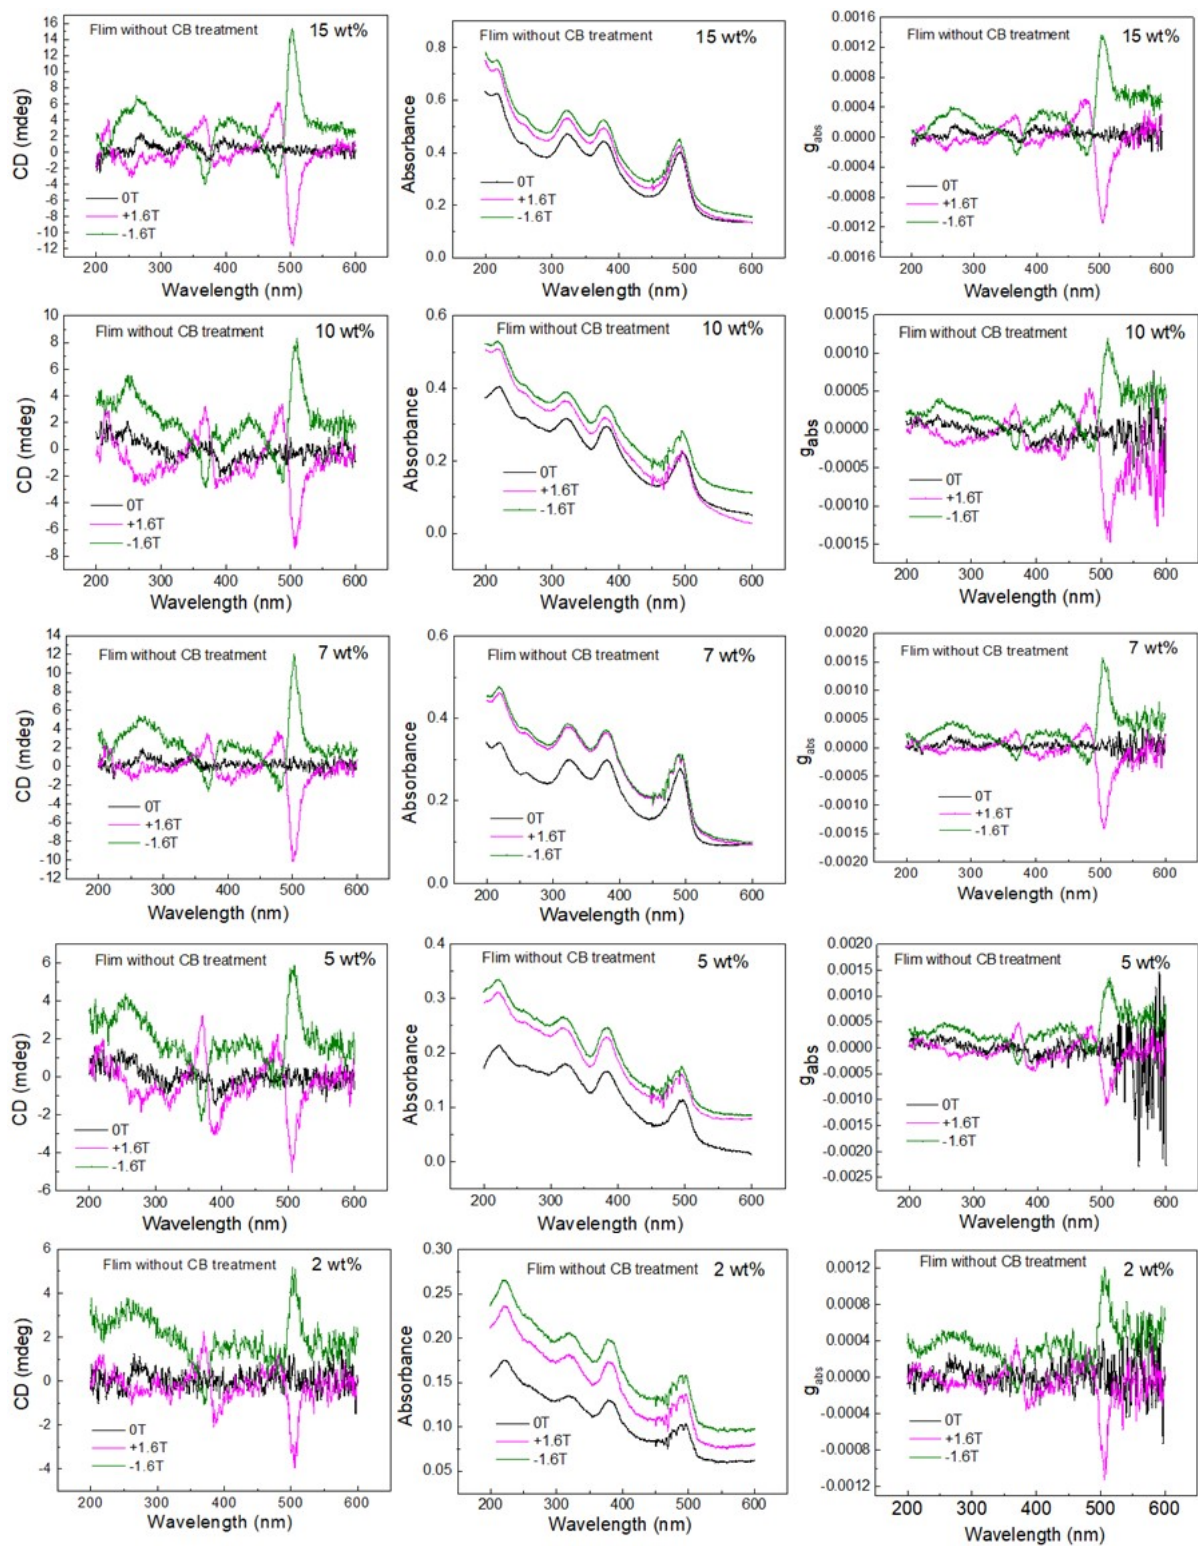

Figure S31: The CD, absorbance, and  $g_{\text{abs}}$  of  $(R\text{-BA})_2\text{PbI}_4$  films without CB treatment for different concentrations of chiral perovskite at the presence of a magnetic field



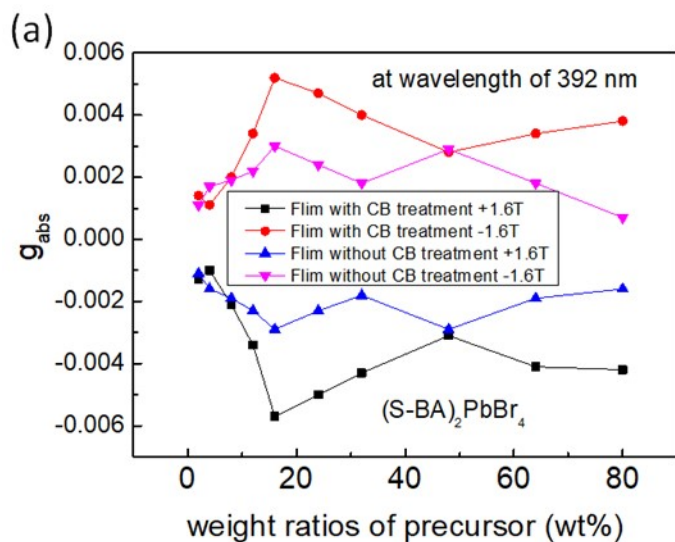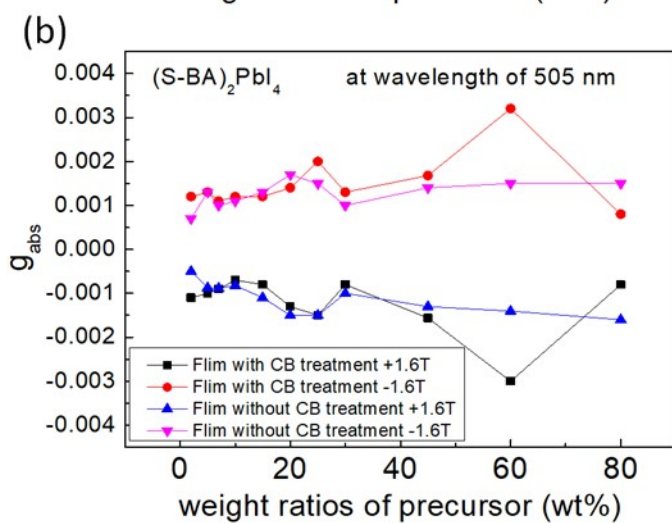

Figure S32: The  $g_{abs}$  as a function of precursor concentration of (a) (S-BA)<sub>2</sub>PbBr<sub>4</sub> and (b) (S-BA)<sub>2</sub>PbI<sub>4</sub> films with CB treatment for different concentration of chiral perovskite

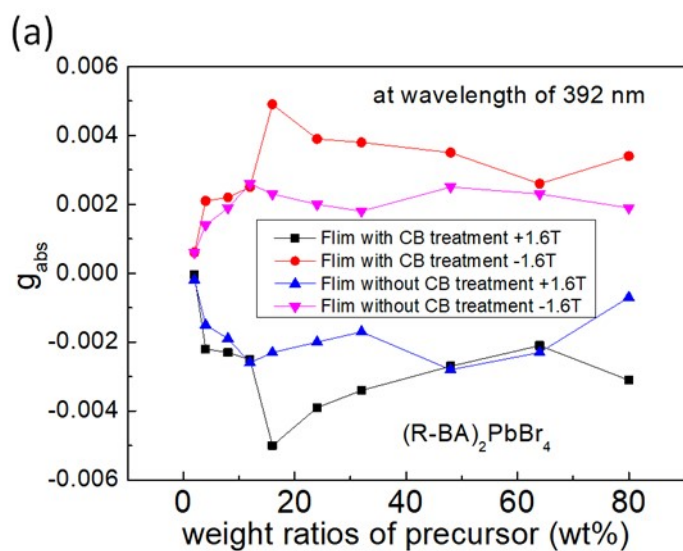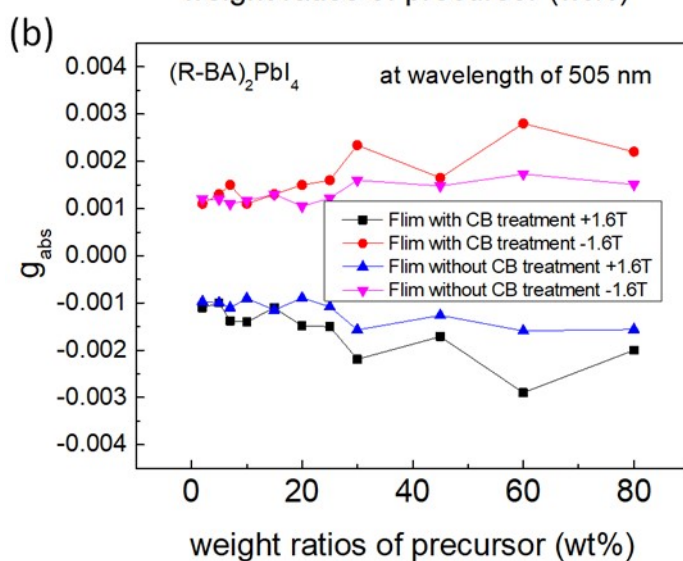

Figure S33: The  $g_{abs}$  as a function of precursor concentration of (a) (R-BA)<sub>2</sub>PbBr<sub>4</sub> and (b) (R-BA)<sub>2</sub>PbI<sub>4</sub> films with and without CB treatment for different concentration of chiral perovskite.

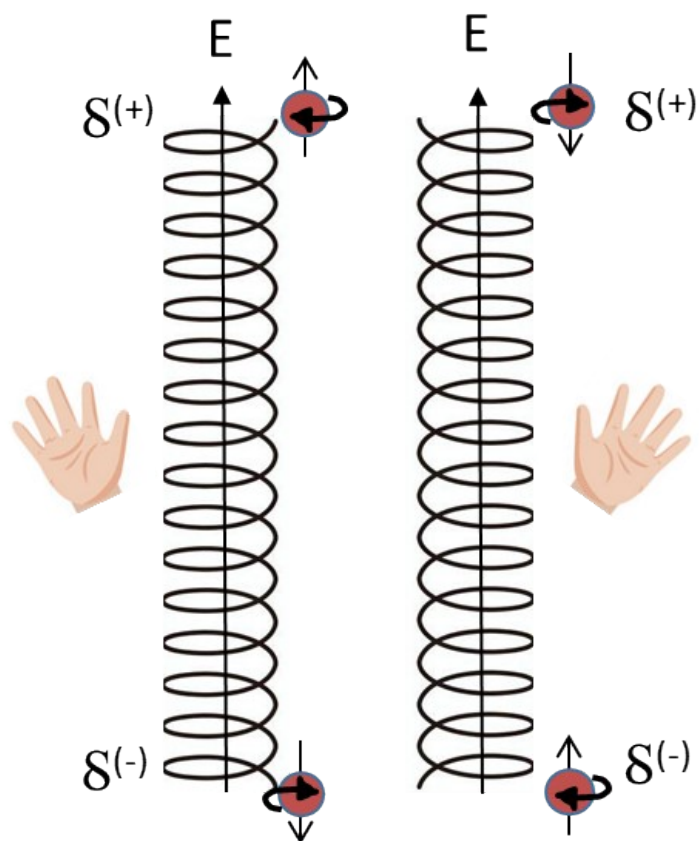

Figure S34: A schematic illustration of charge and spin polarization in a chiral molecule when the molecule is exposed to an electric field acting along its axis (black arrow). The electric field induces spin-selective electron movement, resulting in transient spin polarization at the poles ( $\delta(+)$  and  $\delta(-)$ ) at the ends of the helix). The spin correlated with each pole depends on the handedness of the molecule.

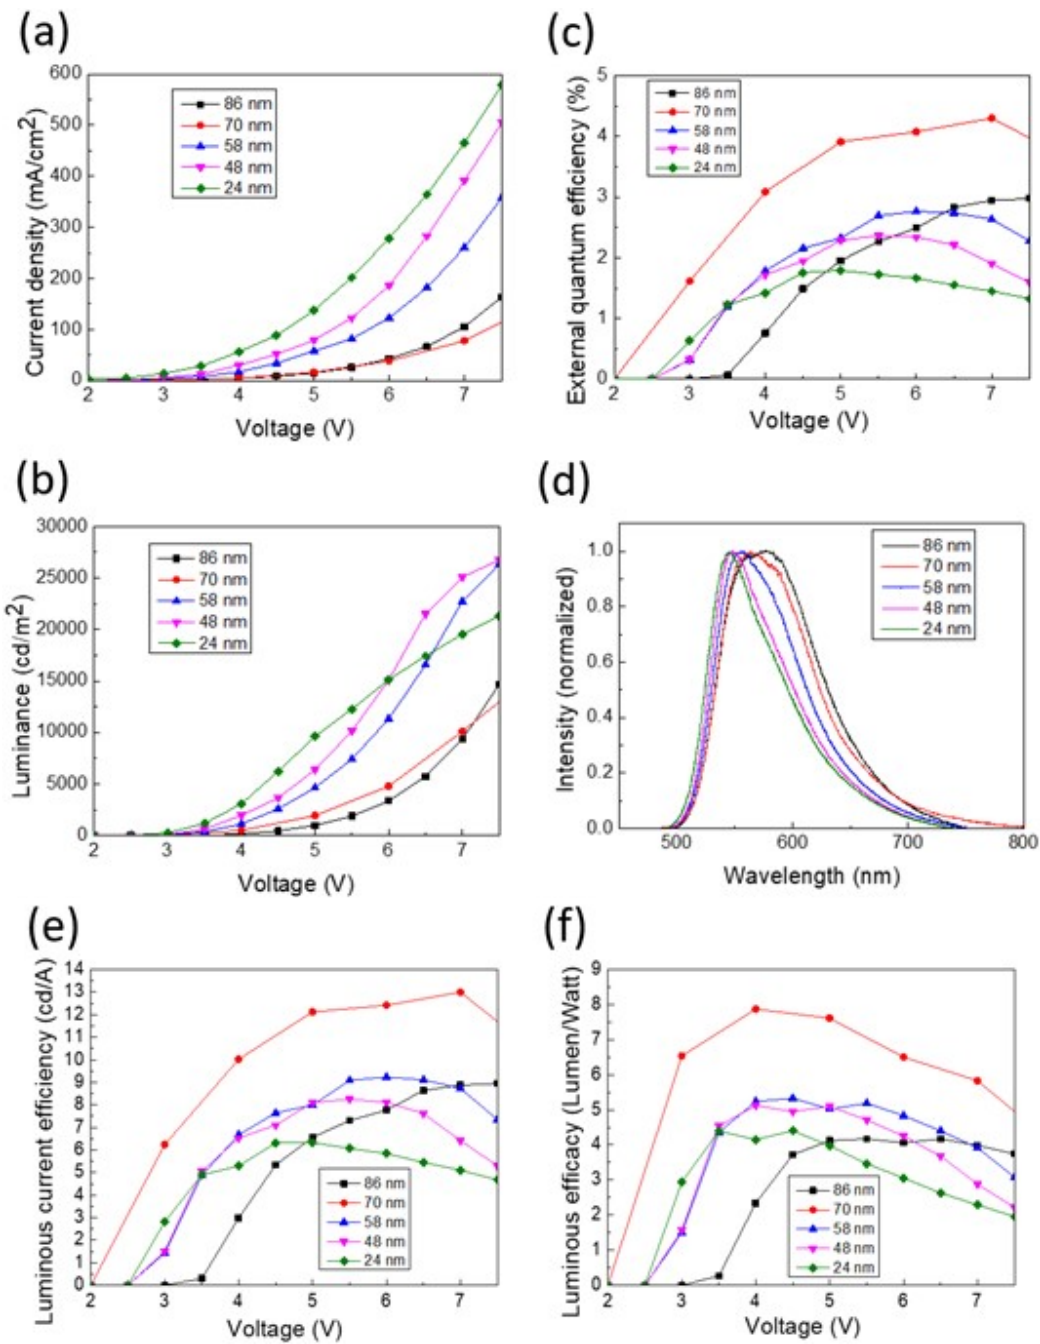

Figure S35: The electric performance of OLED device without chiral perovskites with various thickness of the emissive layer

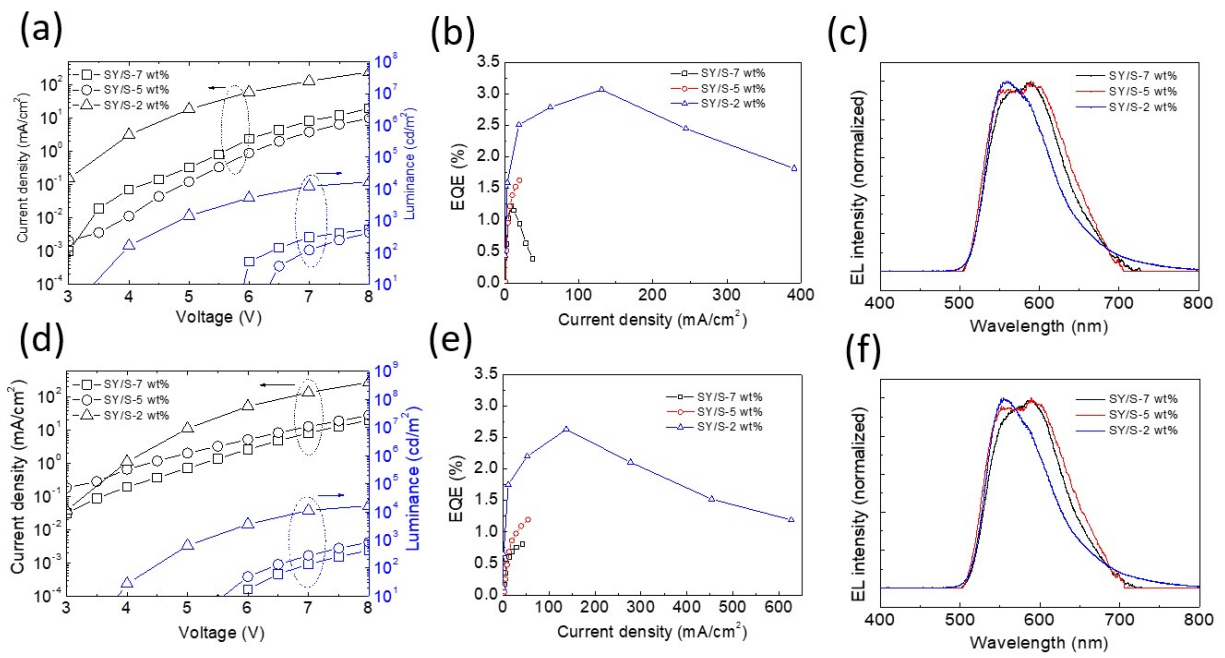

Figure S36: Performance of device based on (a,b,c) CB-treated and (d,e,f) untreated  $(S-BA)_2PbI_4$ , (a,d) J-V-L curves as a function of voltage (b,e) EQE as a function of current density and (c,f) normalized EL as a function of wavelength.

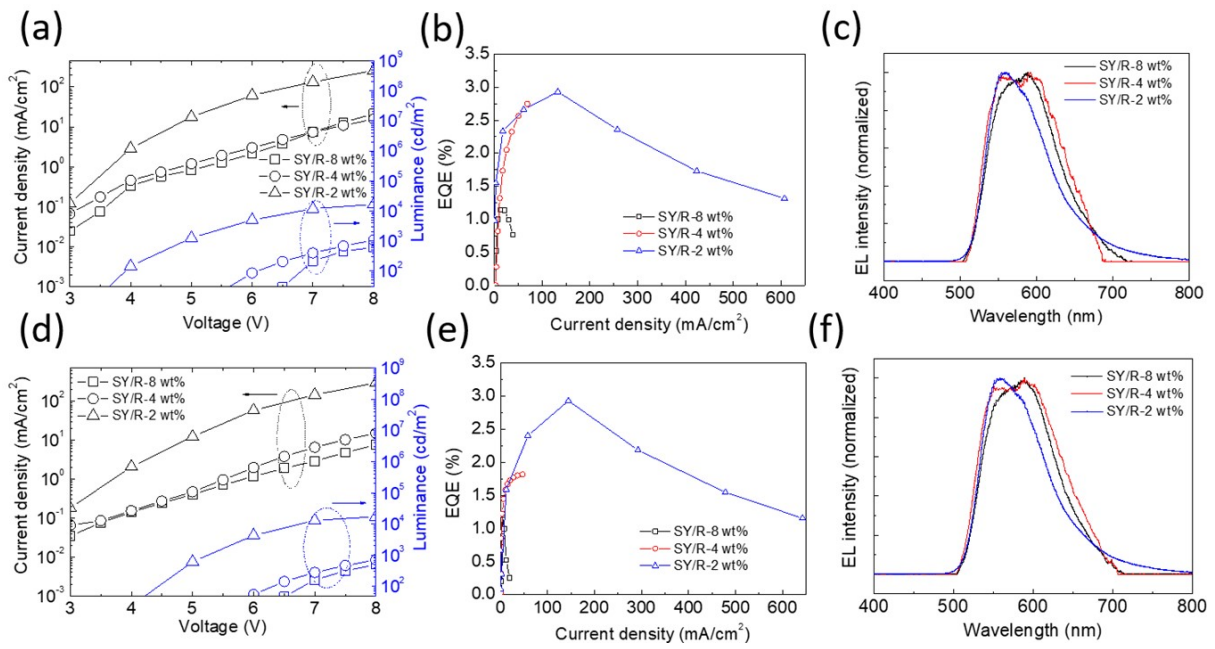

Figure S37: Performance of device based on (a,b,c) CB-treated and (d,e,f) untreated  $(R-BA)_2PbBr_4$ , (a,d) J-V-L curves as a function of voltage (b,e) EQE as a function of current density and (c,f) normalized EL as a function of wavelength.

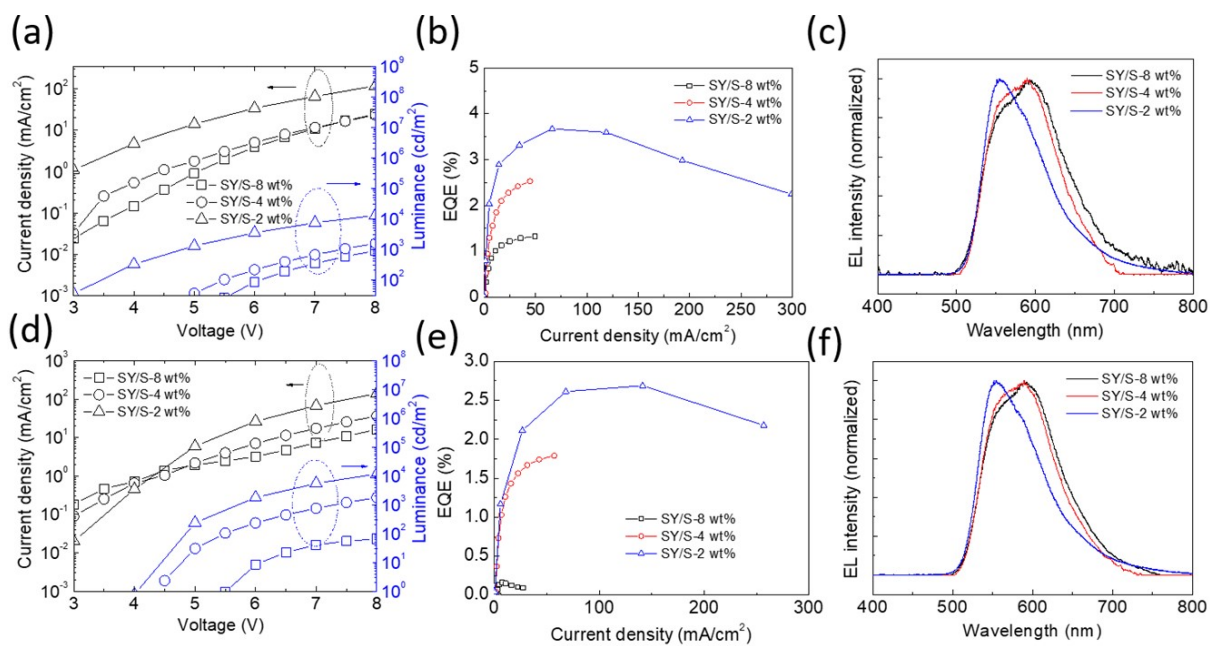

Figure S38: Performance of device based on (a,b,c) CB-treated and (d,e,f) untreated (S-BA)<sub>2</sub>PbBr<sub>4</sub>, (a,d) J-V-L curves as a function of voltage (b,e) EQE as a function of current density and (c,f) normalized EL as a function of wavelength.

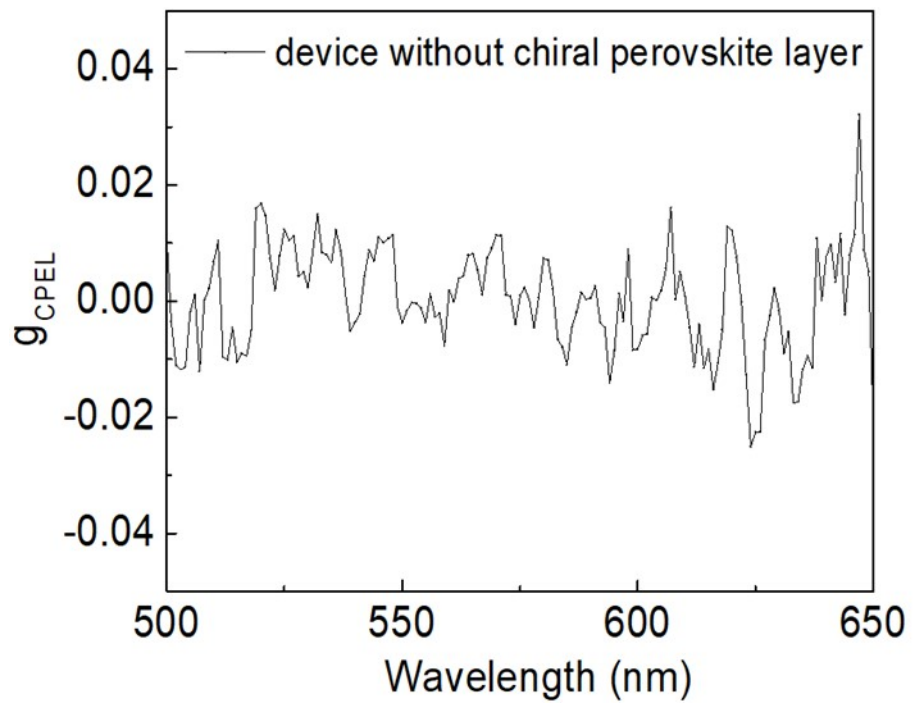

Figure S39: The  $g_{\text{CPEL}}$  as a function of wavelength for OLED device without chiral perovskites as CISS layer



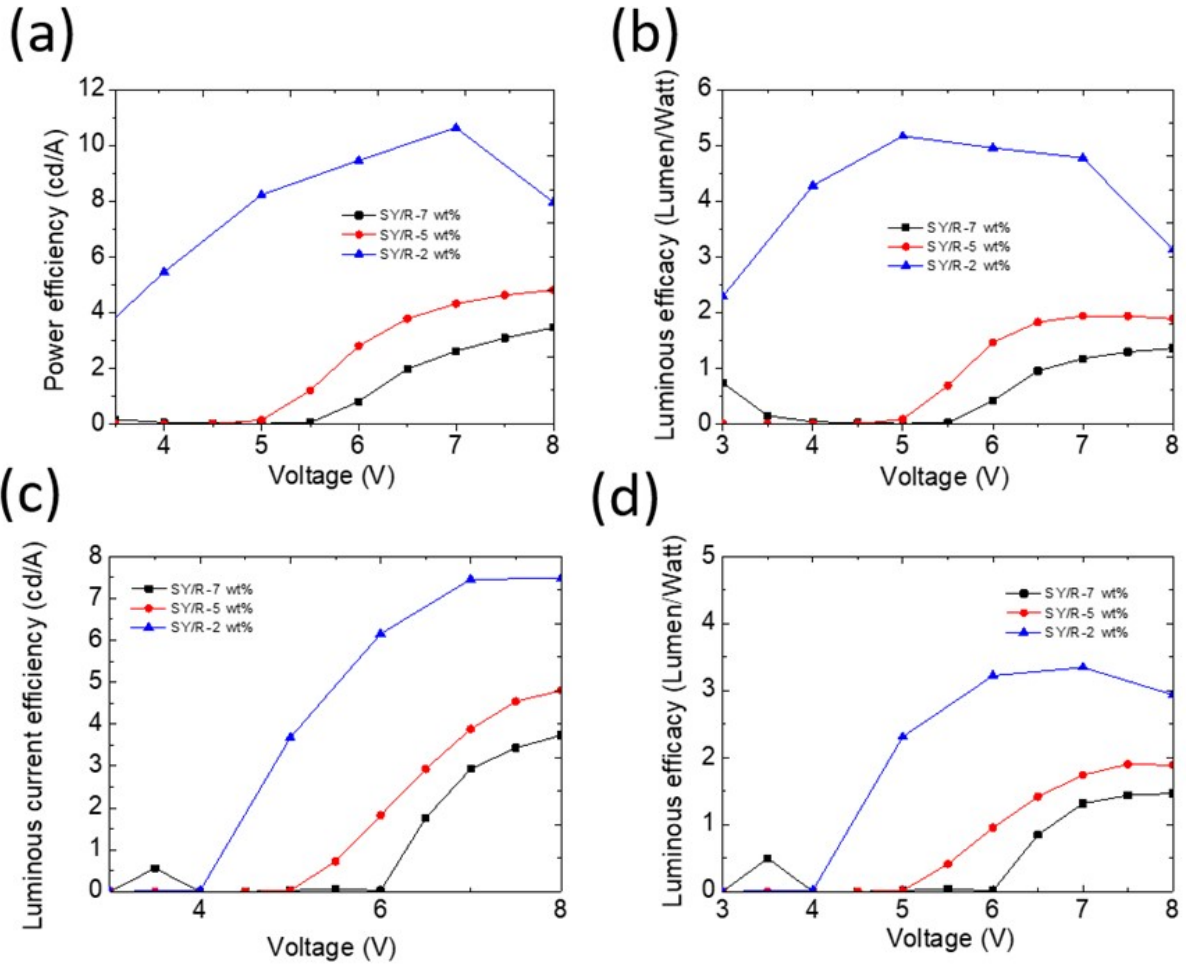

Figure S40: Performance of device based on (a,b) CB-treated and (c,d) untreated (R-BA)<sub>2</sub>PbI<sub>4</sub>, (a,c) power efficiencies (Cd/A) and (b,d) luminous efficiencies (Lm/W) as a function of voltage

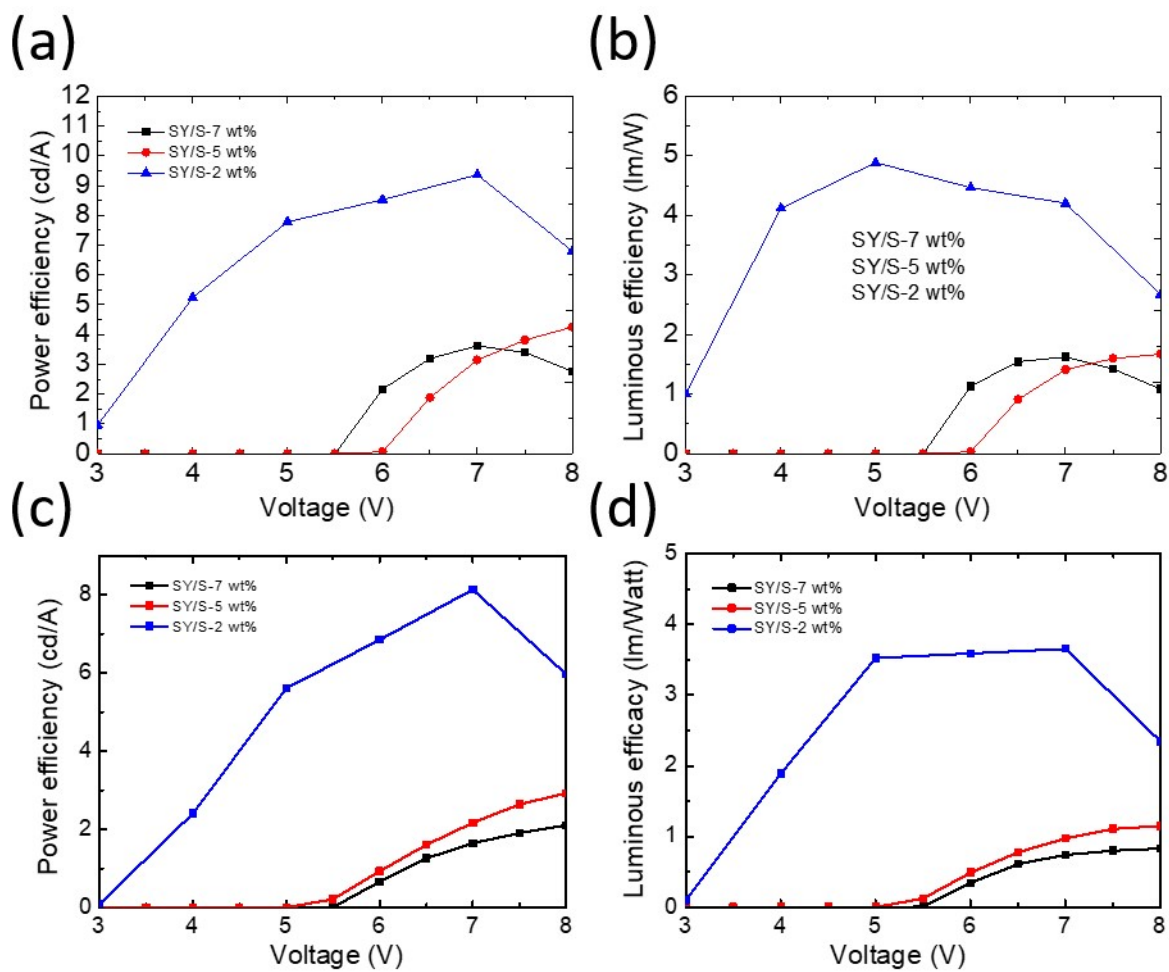

Figure S41: Performance of device based on (a,b) CB-treated and (c,d) untreated  $(S-BA)_2PbI_4$ , (a,c) power efficacies (Cd/A) and (b,d) luminous efficacies (Lm/W) as a function of voltage

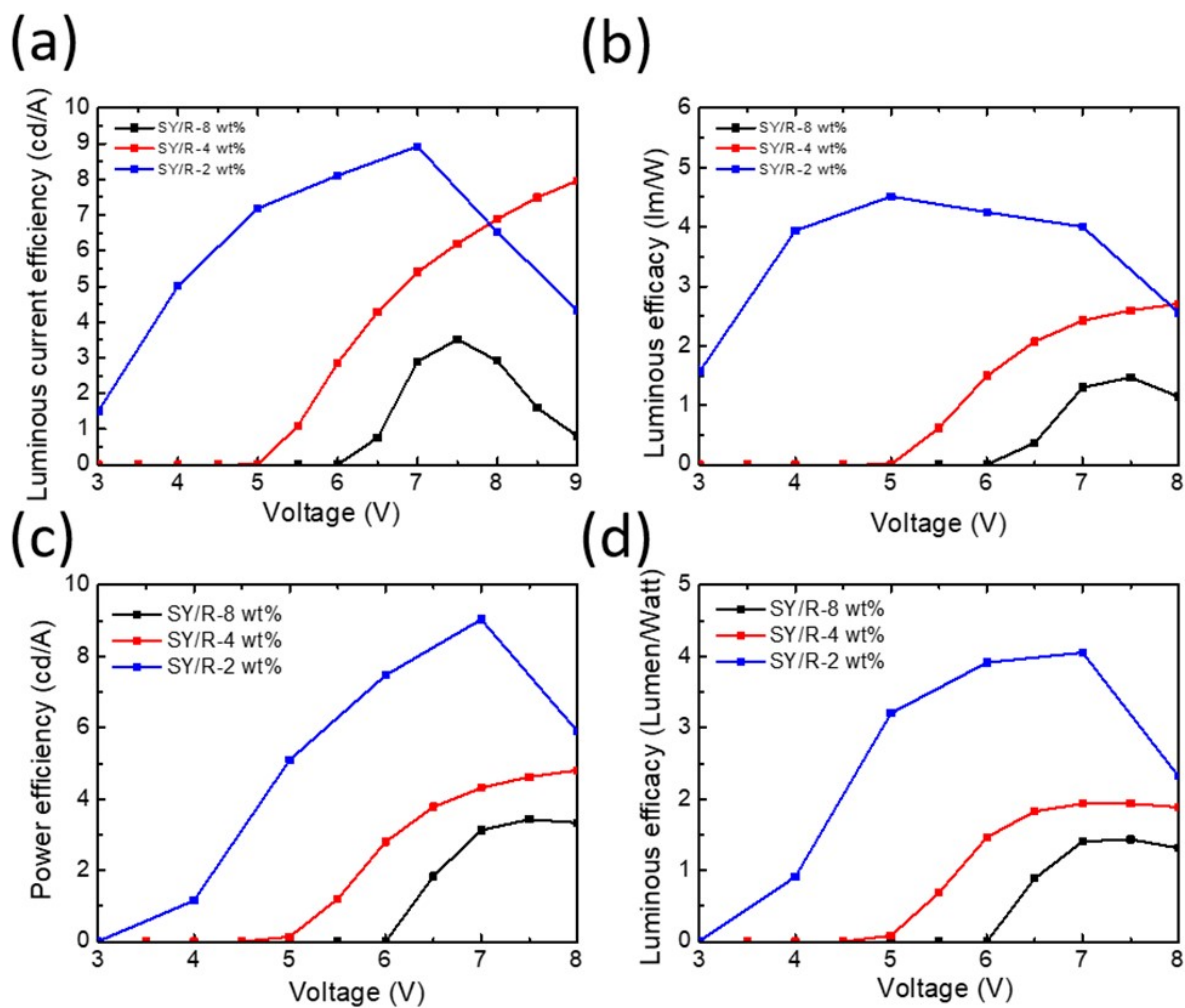

Figure S42: Performance of device based on (a,b) CB-treated and (c,d) untreated (R-BA)<sub>2</sub>PbBr<sub>4</sub>, (a,c) power efficiencies (Cd/A) and (b,d) luminous efficacies (Lm/W) as a function of voltage

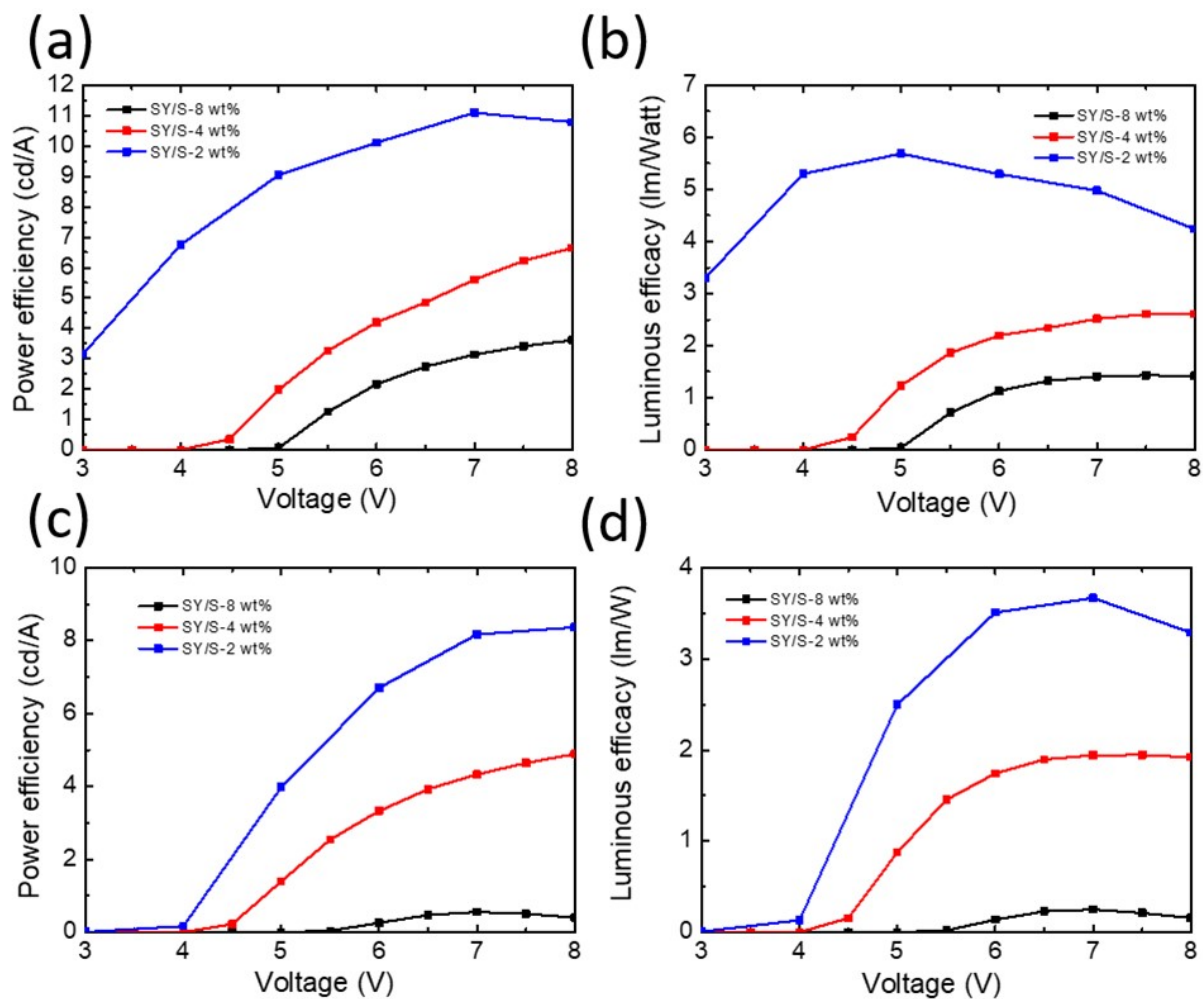

Figure S43: Performance of device based on (a,b) CB-treated and (c,d) untreated (S-BA)<sub>2</sub>PbBr<sub>4</sub>, (a,c) power efficiencies (Cd/A) and (b,d) luminous efficacies (lm/W) as a function of voltage

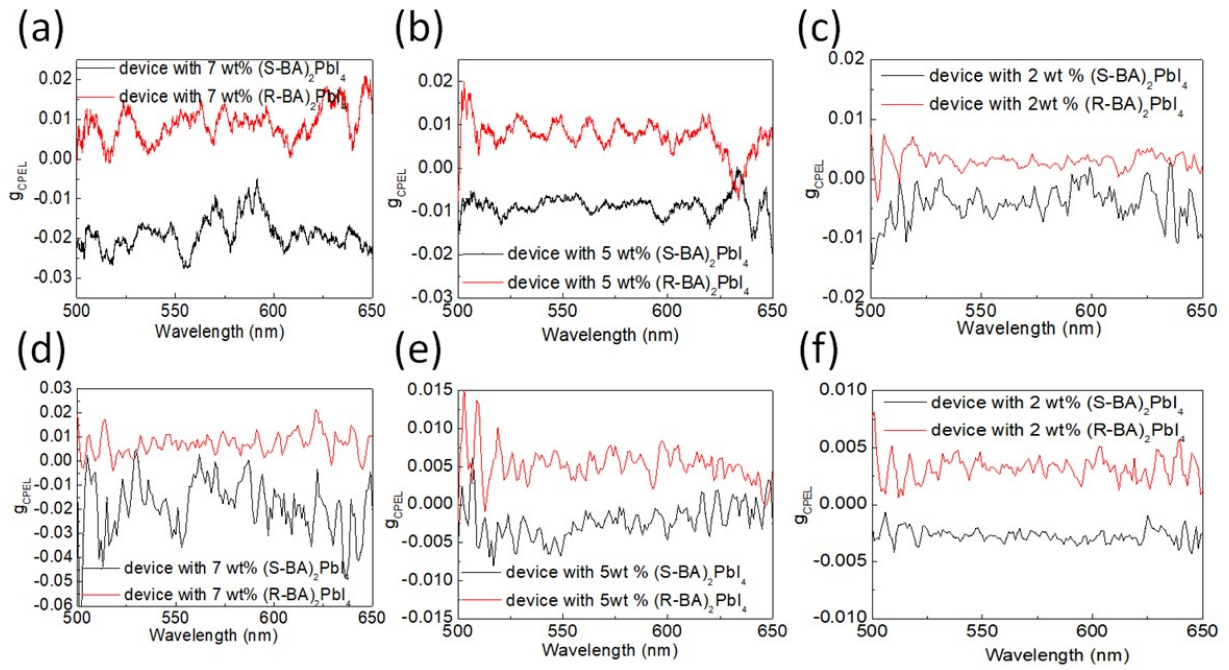

Figure S44: The  $g_{CP-EL}$  of various precursor concentration as a function of wavelength, (a), (b) and (c) for the OLED devices based on  $(S-/R-BA)_2PbI_4$  films with CB treatment and (d), (e) and (f) for the OLED devices based on  $(S-/R-BA)_2PbI_4$  films without CB treatment.

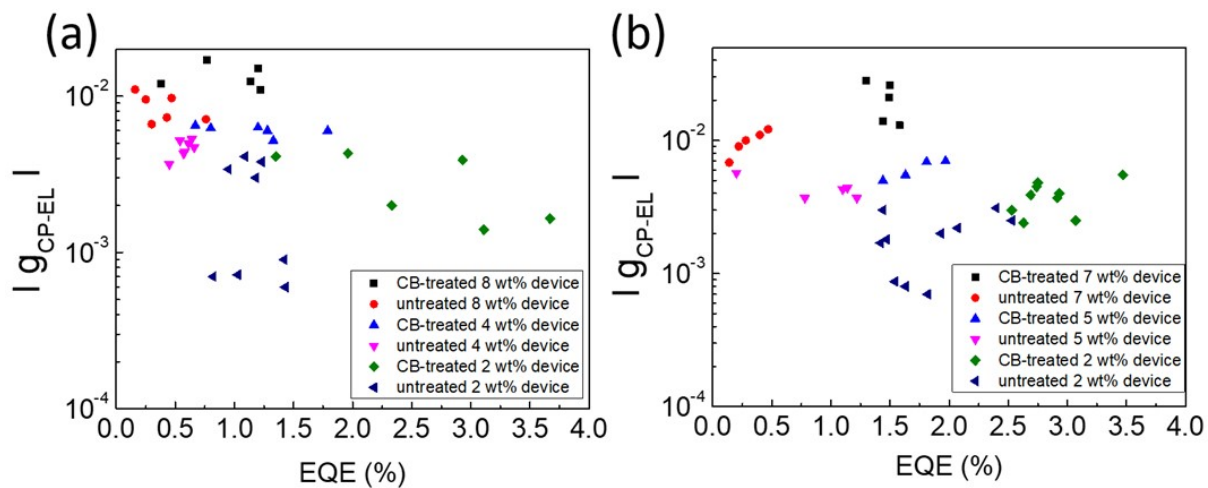

Figure S45: The statistics for  $|g_{CP-EL}|$  and EQE of various chiral perovskites precursor concentration for spin-OLED devices based on CB-treated and untreated (a)  $(S-/R-BA)_2PbBr_4$  films and (b)  $(S-/R-BA)_2PbI_4$  films.

Table S1: The grain size and roughness of the CB-treated and untreated (S-BA)<sub>2</sub>PbBr<sub>4</sub> films for different concentration of chiral perovskite

| <b>(S-BA)<sub>2</sub>PbBr<sub>4</sub> film with CB treatment</b> | <b>Film type</b> | <b>Size or roughness</b>    | <b>(S-BA)<sub>2</sub>PbBr<sub>4</sub> film without CB treatment</b> | <b>Film type</b> | <b>Size or roughness</b> |
|------------------------------------------------------------------|------------------|-----------------------------|---------------------------------------------------------------------|------------------|--------------------------|
| 80 wt%                                                           | Smooth film      | RMS=14.7nm                  | 80 wt%                                                              | rough film       | RMS=73.5nm               |
| 64wt%                                                            | Smooth film      | RMS=11.5nm                  | 64wt%                                                               | nanosheets       | 7um x 7um x 425nm        |
| 48 wt%                                                           | Smooth film      | RMS=10.7nm                  | 48 wt%                                                              | nanosheets       | 7um x 7um x 350nm        |
| 32 wt%                                                           | Smooth film      | RMS= 8.56 nm/<br>(141.7 nm) | 32 wt%                                                              | nanosheets       | 4um x 4um x 275nm        |
| 24 wt%                                                           | Smooth film      | RMS= 7.56 nm/<br>(98.6 nm)  | 24 wt%                                                              | nanosheets       | 4um x 4um x 225nm        |
| 16 wt%                                                           | nanosheets       | 1um x 1um x 70nm            | 16 wt%                                                              | nanosheets       | 3um x 3um x 140nm        |
| 12 wt%                                                           | nanosheets       | 1um x 1um x 40nm            | 12 wt%                                                              | nanosheets       | 2um x 2um x 90nm         |
| 8 wt%                                                            | nanosheets       | 1um x 1um x 30nm            | 8 wt%                                                               | nanosheets       | 1um x 1um x 70nm         |
| 4 wt%                                                            | nanosheets       | 0.9um x 0.9um x 30nm        | 4 wt%                                                               | nanosheets       | 0.8um x 0.8um x 30nm     |
| 2 wt%                                                            | nanosheets       | 0.8um x 0.8um x 30nm        | 2 wt%                                                               | nanosheets       | 0.5um x 0.5um x 30nm     |

Table S2: The gabs of the CB-treated and untreated (S-BA)<sub>2</sub>PbBr<sub>4</sub> films for different concentration of chiral perovskite in the presence of a magnetic field

| <b>(S-BA)<sub>2</sub>PbBr<sub>4</sub> film with CB treatment</b> | <b>g<sub>MCD</sub> under +1.6T/-1.6T</b> | <b>(S-BA)<sub>2</sub>PbBr<sub>4</sub> film without CB treatment</b> | <b>g<sub>MCD</sub> under +1.6T/-1.6T</b> |
|------------------------------------------------------------------|------------------------------------------|---------------------------------------------------------------------|------------------------------------------|
| 80 wt%                                                           | -0.0042/0.0038                           | 80 wt%                                                              | -0.0016/0.0007                           |
| 64 wt%                                                           | -0.0041/0.0034                           | 64 wt%                                                              | -0.0019/0.0018                           |
| 48 wt%                                                           | -0.0031/0.0028                           | 48 wt%                                                              | -0.0029/0.0029                           |
| 32 wt%                                                           | -0.0043/0.004                            | 32 wt%                                                              | -0.0018/0.0018                           |
| 24 wt%                                                           | -0.005/0.0047                            | 24 wt%                                                              | -0.0023/0.0024                           |
| 16 wt%                                                           | -0.0057/0.0052                           | 16 wt%                                                              | -0.0029/0.003                            |
| 12 wt%                                                           | -0.0034/0.0034                           | 12 wt%                                                              | -0.0023/0.0022                           |
| 8 wt%                                                            | -0.0021/0.002                            | 8 wt%                                                               | -0.0019/0.0019                           |
| 4 wt%                                                            | -0.001/0.0011                            | 4 wt%                                                               | -0.0016/0.0017                           |
| 2 wt%                                                            | -0.0013/0.0014                           | 2 wt%                                                               | -0.0011/0.0011                           |



Table S3: The gabs of the CB-treated and untreated (S-BA)<sub>2</sub>PbI<sub>4</sub>films for different concentration of chiral perovskite in the presence of a magnetic field

| <b>(S-BA)<sub>2</sub>PbI<sub>4</sub> film with<br/>CB treatment</b> | <b>g<sub>MCD</sub> under<br/>+1.6T/-1.6T</b> | <b>(S-BA)<sub>2</sub>PbI<sub>4</sub> film without<br/>CB treatment</b> | <b>g<sub>MCD</sub> under<br/>+1.6T/-1.6T</b> |
|---------------------------------------------------------------------|----------------------------------------------|------------------------------------------------------------------------|----------------------------------------------|
| 80 wt%                                                              | -0.0002/0.0022                               | 80 wt%                                                                 | -0.00156/0.00151                             |
| 60 wt%                                                              | -0.0029/0.0028                               | 60 wt%                                                                 | -0.00159/0.00173                             |
| 30 wt%                                                              | -0.0032/0.0029                               | 30 wt%                                                                 | -0.00157/0.0016                              |
| 25 wt%                                                              | -0.0015/0.0016                               | 25 wt%                                                                 | -0.00108/0.00122                             |
| 20 wt%                                                              | -0.0015/0.0015                               | 20 wt%                                                                 | -0.00089/0.00105                             |
| 15 wt%                                                              | -0.0011/0.0013                               | 15 wt%                                                                 | -0.00115/0.0013                              |
| 10 wt%                                                              | -0.0014/0.0011                               | 10 wt%                                                                 | -0.0009/0.00117                              |
| 7 wt%                                                               | -0.0014/0.0015                               | 7 wt%                                                                  | -0.0011/0.0011                               |
| 5 wt%                                                               | -0.001/0.0013                                | 5 wt%                                                                  | -0.001/0.0012                                |
| 2 wt%                                                               | -0.0011/0.0011                               | 2 wt%                                                                  | -0.001/0.0012                                |

Table S4: The  $g_{\text{MCD}}$  of the CB-treated and untreated  $(\text{R-BA})_2\text{PbBr}_4$  films for different concentration of chiral perovskite in the presence of a magnetic field

| <b><math>(\text{R-BA})_2\text{PbBr}_4</math> film with CB treatment</b> | <b><math>g_{\text{MCD}}</math> under +1.6T/-1.6T</b> | <b><math>(\text{R-BA})_2\text{PbBr}_4</math> film without CB treatment</b> | <b><math>g_{\text{MCD}}</math> under +1.6T/-1.6T</b> |
|-------------------------------------------------------------------------|------------------------------------------------------|----------------------------------------------------------------------------|------------------------------------------------------|
| 80 wt%                                                                  | -0.0031/0.0034                                       | 80 wt%                                                                     | -0.0007/0.0019                                       |
| 64 wt%                                                                  | -0.0021/0.0026                                       | 64 wt%                                                                     | -0.0023/0.0023                                       |
| 48 wt%                                                                  | -0.0027/0.0035                                       | 48 wt%                                                                     | -0.0028/0.0025                                       |
| 32 wt%                                                                  | -0.0034/0.0038                                       | 32 wt%                                                                     | -0.0017/0.0018                                       |
| 24 wt%                                                                  | -0.0039/0.0039                                       | 24 wt%                                                                     | -0.002/0.002                                         |
| 16 wt%                                                                  | -0.005/0.0049                                        | 16 wt%                                                                     | -0.0023/0.0023                                       |
| 12 wt%                                                                  | -0.0025/0.0025                                       | 12 wt%                                                                     | -0.0026/0.0026                                       |
| 8 wt%                                                                   | -0.0023/0.0022                                       | 8 wt%                                                                      | -0.0019/0.0019                                       |
| 4 wt%                                                                   | -0.0022/0.0021                                       | 4 wt%                                                                      | -0.0015/0.0014                                       |
| 2 wt%                                                                   | -0.0005/0.0006                                       | 2 wt%                                                                      | -0.0002/0.0006                                       |

Table S5: The  $g_{\text{MCD}}$  of the CB-treated and untreated  $(\text{R-BA})_2\text{PbI}_4$  films for different concentration of chiral perovskite in the presence of a magnetic field

| <b><math>(\text{R-BA})_2\text{PbI}_4</math> film with CB treatment</b> | <b><math>g_{\text{MCD}}</math> under +1.6T/-1.6T</b> | <b><math>(\text{R-BA})_2\text{PbI}_4</math> film without CB treatment</b> | <b><math>g_{\text{MCD}}</math> under +1.6T/-1.6T</b> |
|------------------------------------------------------------------------|------------------------------------------------------|---------------------------------------------------------------------------|------------------------------------------------------|
| 80 wt%                                                                 | -0.0008/0.0008                                       | 80 wt%                                                                    | -0.0016/0.0015                                       |
| 60 wt%                                                                 | -0.003/0.0032                                        | 60 wt%                                                                    | -0.0014/0.0015                                       |
| 30 wt%                                                                 | -0.0008/0.0013                                       | 30 wt%                                                                    | -0.0013/0.0014                                       |
| 25 wt%                                                                 | -0.0015/0.002                                        | 25 wt%                                                                    | -0.0015/0.0015                                       |
| 20 wt%                                                                 | -0.0013/0.0014                                       | 20 wt%                                                                    | -0.0015/0.0017                                       |
| 15 wt%                                                                 | -0.0008/0.0012                                       | 15 wt%                                                                    | -0.0011/0.0013                                       |
| 10 wt%                                                                 | -0.0007/0.0012                                       | 10 wt%                                                                    | -0.00082/0.0011                                      |
| 7 wt%                                                                  | -0.0009/0.0011                                       | 7 wt%                                                                     | -0.00088/0.001                                       |
| 5 wt%                                                                  | -0.001/0.0013                                        | 5 wt%                                                                     | -0.00087/0.0013                                      |
| 2 wt%                                                                  | -0.0011/0.0012                                       | 2 wt%                                                                     | -0.0005/0.0007                                       |

Table S6: The Rashba splitting and Zeeman splitting of the CB-treated and untreated (S-BA)<sub>2</sub>PbBr<sub>4</sub> films for different concentration of chiral perovskite

| <b>(S-BA)<sub>2</sub>PbBr<sub>4</sub> film with CB treatment</b> | <b>Rashba splitting <math>\Delta E</math> under 0 Tesla</b> | <b>Zeeman splitting <math>\Delta E</math> under +1.6 Tesla</b> | <b>(S-BA)<sub>2</sub>PbBr<sub>4</sub> film without CB treatment</b> | <b>Rashba splitting <math>\Delta E</math> under 0 Tesla</b> | <b>Zeeman splitting <math>\Delta E</math> under +1.6 Tesla</b> |
|------------------------------------------------------------------|-------------------------------------------------------------|----------------------------------------------------------------|---------------------------------------------------------------------|-------------------------------------------------------------|----------------------------------------------------------------|
| 32 wt%                                                           | 29.9 $\mu eV$                                               | +315 $\mu eV$                                                  | 32 wt%                                                              | ~10 $\mu eV$                                                | +286 $\mu eV$                                                  |
| 24 wt%                                                           | 20.3 $\mu eV$                                               | +240 $\mu eV$                                                  | 24 wt%                                                              | ~10 $\mu eV$                                                | +370 $\mu eV$                                                  |
| 16 wt%                                                           | 12.4 $\mu eV$                                               | +380.3 $\mu eV$                                                | 16 wt%                                                              | ~10 $\mu eV$                                                | +372 $\mu eV$                                                  |
| 12 wt%                                                           | ~10 $\mu eV$                                                | +376 $\mu eV$                                                  | 12 wt%                                                              | ~10 $\mu eV$                                                | +355 $\mu eV$                                                  |
| 8 wt%                                                            | ~10 $\mu eV$                                                | +334 $\mu eV$                                                  | 8 wt%                                                               | ~10 $\mu eV$                                                | +339 $\mu eV$                                                  |

Table S7: Summary on EL parameters of spin OLED device based on CB-treated and untreated (S-/R-BA)<sub>2</sub>PbI<sub>4</sub> films as CISS layer

|                                 | <b>Luminance<sub>max</sub></b><br><b>[cd m<sup>-2</sup>]</b> | <b>EQE<sub>max</sub></b><br><b>[%]</b> | <b>Power efficiency</b><br><b>[Cd/A]</b> | <b>luminous efficiency</b><br><b>[lm/W]</b> |
|---------------------------------|--------------------------------------------------------------|----------------------------------------|------------------------------------------|---------------------------------------------|
| CB-treated R form-7wt% devices  | 336                                                          | 1.51                                   | 3.46                                     | 1.36                                        |
| CB-treated R form-5wt% devices  | 715                                                          | 1.82                                   | 4.8                                      | 1.94                                        |
| CB-treated R form -2wt% devices | 16803                                                        | 3.47                                   | 10.63                                    | 5.17                                        |
| untreated R form -7wt% devices  | 208                                                          | 1.49                                   | 3.73                                     | 1.47                                        |
| untreated R form -5wt% devices  | 639                                                          | 1.82                                   | 4.8                                      | 1.9                                         |
| untreated R form -2wt% devices  | 11520                                                        | 2.4                                    | 7.48                                     | 3.35                                        |
| CB-treated S form -7wt% devices | 438                                                          | 1.22                                   | 3.62                                     | 1.62                                        |
| CB-treated S form -5wt% devices | 938                                                          | 1.63                                   | 4.3                                      | 1.67                                        |
| CB-treated S form -2wt% devices | 18063                                                        | 3.07                                   | 9.4                                      | 4.89                                        |
| untreated S form -7wt% devices  | 772                                                          | 0.69                                   | 2.11                                     | 0.83                                        |
| untreated S form -5wt% devices  | 1889                                                         | 1.2                                    | 2.92                                     | 1.15                                        |
| untreated S form -2wt% devices  | 18722                                                        | 2.63                                   | 8.14                                     | 3.65                                        |

Table S8: Summary on EL parameters of spin OLED device based on CB-treated and untreated (S-/R-BA)<sub>2</sub>PbBr<sub>4</sub> films as CISS layer

|                                  | <b>Luminance<sub>max</sub></b><br><b>[cd m<sup>-2</sup>]</b> | <b>EQE<sub>max</sub></b><br><b>[%]</b> | <b>Power efficiency</b><br><b>[Cd/A]</b> | <b>luminous efficiency</b><br><b>[lm/W]</b> |
|----------------------------------|--------------------------------------------------------------|----------------------------------------|------------------------------------------|---------------------------------------------|
| CB-treated R form - 8wt% devices | 309                                                          | 1.14                                   | 3.5                                      | 1.47                                        |
| CB-treated R form - 4wt% devices | 2339                                                         | 2.75                                   | 6.89                                     | 2.71                                        |
| CB-treated R form - 2wt% devices | 19098                                                        | 2.94                                   | 8.92                                     | 4.52                                        |
| untreated R form - 8wt% devices  | 772                                                          | 1.2                                    | 3.43                                     | 1.43                                        |
| untreated R form - 4wt% devices  | 2416                                                         | 1.82                                   | 4.81                                     | 1.94                                        |
| untreated R form - 2wt% devices  | 18746                                                        | 2.93                                   | 9.03                                     | 4.05                                        |
| CB-treated S form - 8wt% devices | 1900                                                         | 1.33                                   | 3.61                                     | 1.43                                        |
| CB-treated S form - 4wt% devices | 3223                                                         | 2.53                                   | 6.65                                     | 2.61                                        |
| CB-treated S form - 2wt% devices | 17563                                                        | 3.68                                   | 11.1                                     | 5.69                                        |
| untreated S form - 8wt% devices  | 79                                                           | 0.163                                  | 0.55                                     | 0.25                                        |
| untreated S form - 4wt% devices  | 3578                                                         | 1.791                                  | 4.89                                     | 1.94                                        |
| untreated S form - 2wt% devices  | 16201                                                        | 2.69                                   | 8.37                                     | 3.67                                        |

Table S9: Relevant chiroptical properties reported for the chiral perovskite applied to spin-LEDs.

| Spin filter                                                 | Emissive layer                                                              | EQE [%](max) | luminous efficiency max[lm/W] | Power efficiency [cd/A](max) | Luminescence dissymmetry factor gCPEL(max) | Ref.      |
|-------------------------------------------------------------|-----------------------------------------------------------------------------|--------------|-------------------------------|------------------------------|--------------------------------------------|-----------|
| CB-treated <b>(R-BA)<sub>2</sub>PbI<sub>4</sub></b> -7wt%   | Organic polymer                                                             | 1.51         | 5.17                          | 3.46                         | 0.016                                      | This work |
| CB-treated <b>(S-BA)<sub>2</sub>PbI<sub>4</sub></b> - 7wt%  | Organic polymer                                                             | 1.22         | 1.62                          | 3.62                         | -0.026                                     | This work |
| CB-treated <b>(R-BA)<sub>2</sub>PbI<sub>4</sub></b> - 2wt%  | Organic polymer                                                             | 3.47         | 1.36                          | 10.63                        | 0.0055                                     | This work |
| CB-treated <b>(S-BA)<sub>2</sub>PbI<sub>4</sub></b> - 2wt%  | Organic polymer                                                             | 3.07         | 4.89                          | 9.4                          | -0.0048                                    | This work |
| CB-treated <b>(R-BA)<sub>2</sub>PbBr<sub>4</sub></b> - 8wt% | Organic polymer                                                             | 1.14         | 1.47                          | 3.5                          | 0.015                                      | This work |
| CB-treated <b>(S-BA)<sub>2</sub>PbBr<sub>4</sub></b> - 8wt% | Organic polymer                                                             | 1.33         | 1.43                          | 3.61                         | -0.017                                     | This work |
| CB-treated <b>(R-BA)<sub>2</sub>PbBr<sub>4</sub></b> - 2wt% | Organic polymer                                                             | 2.94         | 4.52                          | 8.92                         | 0.0041                                     | This work |
| CB-treated <b>(S-BA)<sub>2</sub>PbBr<sub>4</sub></b> - 2wt% | Organic polymer                                                             | 3.68         | 5.69                          | 11.1                         | -0.0039                                    | This work |
| <b>(R-MBA)<sub>2</sub>PbI<sub>4</sub></b>                   | QDs (CdSe)                                                                  | 0.9          | -                             | -                            | 0.02                                       | [24]      |
| <b>(S-MBA)<sub>2</sub>PbI<sub>4</sub></b>                   | QDs (CdSe)                                                                  | 1            | -                             | -                            | -0.005                                     | [24]      |
| -                                                           | MAPbBr <sub>3</sub> NCs with with a chiral low-dimensional perovskite shell | -            | -                             | -                            | +/-0.006                                   | [95]      |
| -                                                           | Quasi-2D chiral perovskites                                                 | 3.7          | -                             | -                            | +0.004                                     | [96]      |
| -                                                           | Quasi-2D chiral perovskites                                                 | 3.7          | -                             | -                            | -0.0032                                    | [96]      |
| <b>(R-MBA)<sub>2</sub>PbI<sub>4</sub></b>                   | CsPbI <sub>3</sub> /Br <sub>3</sub> NCs                                     | 10           | -                             | -                            | +0.026                                     | [19]      |
| <b>(S-MBA)<sub>2</sub>PbI<sub>4</sub></b>                   | CsPbI <sub>3</sub> /Br <sub>3</sub> NCs                                     | 10.5         | -                             | -                            | -0.026                                     | [19]      |
